# Supplementary material for: Synthesis and biological evaluation of new naphthalimide–thiourea derivatives as potent antimicrobial agents active against multidrug-resistant Staphylococcus aureus and Mycobacterium tuberculosis
Source: Royal Society of Chemistry journal article supplement (doi:10.1039/d4md00062e), 2024-01-01
Supplement: d4md00062e1.pdf [file d4md00062e1.pdf]

## Supplementary Information

### **Synthesis and Biological Evaluation of New Naphthalimide-thiourea Derivatives as Potent Antimicrobial Agents Active against multidrug-resistant *Staphylococcus aureus* and *Mycobacterium tuberculosis***

Preeti Rana<sup>a</sup>, Ramulu Parupalli<sup>a</sup>, Abdul Akhir<sup>b</sup>, Deepanshi Saxena<sup>b</sup>, Rahul Maitra<sup>b</sup>, Mohammad Imran<sup>b</sup>, Pradip Malik<sup>b</sup>, Shaik Mahammad Ghouse<sup>a</sup>, Swanand Vinayak Joshi<sup>a</sup>, Danaboina Srikanth<sup>a</sup>, Y.V. Madhavi<sup>a</sup>, Arunava Dasgupta<sup>b,c</sup>, Sidharth Chopra<sup>b,c\*</sup> and Srinivas Nanduri<sup>a\*</sup>

<sup>a</sup>Department of Chemical Sciences, National Institute of Pharmaceutical Education and Research (NIPER), Hyderabad, Telangana-500037, India

<sup>b</sup>Division of Molecular Microbiology and Immunology, CSIR-Central Drug Research Institute, Sitapur Road, Sector 10, Janakipuram Extension, Lucknow-226031, Uttar Pradesh, India

<sup>c</sup>AcSIR: Academy of Scientific and Innovative Research (AcSIR), Ghaziabad 201002, India

\* Corresponding author: Prof. Srinivas Nanduri, Email ID: [nandurisrini92@gmail.com](mailto:nandurisrini92@gmail.com)

Dr. Sidharth Chopra, email: [skchopra007@gmail.com](mailto:skchopra007@gmail.com)

## Contents

### 1. Experimental section

1.1 General methods

1.2 General experimental procedure for synthesis of intermediate **3**

1.3 General experimental procedure for the synthesis of **5a-b**, **7a-b**, **11a-b**, and **15**

1.4 General experimental procedure for the synthesis of intermediate **8a-b**, **12a-b** and **16**

1.5 General experimental procedure for the synthesis of **4a-r**, **9a-l**, **13a-g**, and **17a-e**

1.6. Bacterial strains and media

1.6.1 Antibiotic susceptibility testing against bacterial pathogen panel

1.6.2 Antibiotic susceptibility testing against pathogenic mycobacteria

1.6.3 Cell cytotoxicity assay

1.6.4. Time kill study

1.7 *In silico* studies

1.7.1 Molecular Docking study

1.7.2 *In silico* ADME studies

**Table ST1** MIC values ( $\mu\text{g/mL}$ ) of the tested compounds against panel of bacterial strains.

**Table ST2** MIC ( $\mu\text{g/mL}$ ) of synthesized derivatives against mycobacterial pathogen panel.

**Table ST3.** ADME profile predicted by QikProp

### 2. $^1\text{H}$ NMR, $^{13}\text{C}$ NMR and HRMS spectra

### 3. References

## 1. Experimental section

### 1.1 General methods

All the reagents and solvents were obtained from commercial suppliers and were used without further purification. Analytical thin layer chromatography (TLC) was performed on MERCK precoated silica gel 60-F254 (0.5 mm) aluminium plates. Visualisation of the spots on T.L.C. plates were achieved by U.V. light.  $^1\text{H}$  and  $^{13}\text{C}$  NMR spectra were recorded on Bruker 500 MHz by making a solution of samples in the  $\text{DMSO-}d_6$  as solvent using tetramethyl silane (T.M.S.) as the internal standard. Chemical shifts for  $^1\text{H}$  and  $^{13}\text{C}$  NMR are reported in parts per million (ppm) downfield from tetramethyl silane. Spin multiplicities are described as s (singlet), brs (broad singlet), d (doublet), t (triplet), q (quartet), and m (multiplet). Coupling constant (J) values are reported in hertz (Hz). HRMS were determined with Agilent QTOF mass spectrometer 6540 series instrument. Wherever required, column chromatography was performed using silica gel (60-120). The reactions are carried under positive nitrogen pressure using freshly distilled solvents wherever anhydrous conditions are required. All evaporation of solvents was carried out under reduced pressure using a rotary evaporator below 45 °C. Melting point of compounds were determined with an electrothermal digital melting point apparatus IA9100 and is uncorrected. The names of all the compounds given in the experimental section were taken from ChemDraw Professional, Version 20.0.

### 1.2 General experimental procedure for synthesis of intermediate 3

To the solution of 1,8 naphthalic anhydride (1 mmol) in ethanol, aminoethyl piperazine (1.2 mmol) was added and allowed to reflux for 8 h. After the completion of the reaction as monitored by TLC, the reaction mixture was concentrated under reduced pressure and extracted with ethyl acetate. The combined organic layer was washed with water, dried over sodium sulphate and evaporated to give crude product. This crude product was further purified by column chromatography to obtain pure product **3**.

#### **2-(2-(Piperazin-1-yl)ethyl)-1H-benzo[de]isoquinoline-1,3(2H)-dione (3)**

$^1\text{H}$  NMR (500 MHz,  $\text{CDCl}_3$ )  $\delta$  8.60 (dq,  $J = 7.2, 1.5$  Hz, 2H), 8.21 (dt,  $J = 8.3, 1.6$  Hz, 2H), 7.76 (ddt,  $J = 8.3, 7.2, 1.9$  Hz, 2H), 4.36 (ddt,  $J = 7.2, 5.7, 1.7$  Hz, 2H), 2.90 – 2.85 (m, 4H), 2.70 (ddd,  $J = 8.7,$

6.5, 1.5 Hz, 2H), 2.58 (s, 4H).<sup>13</sup>C NMR (125 MHz, CDCl<sub>3</sub>) δ 164.2, 133.9, 131.6, 131.2, 128.2, 126.9, 122.7, 56.3, 54.8, 46.2, 37.4. HRMS (ESI): *m/z* calculated for [M+H]<sup>+</sup> C<sub>18</sub>H<sub>20</sub>N<sub>3</sub>O<sub>2</sub> 310.1550; found 310.1564.

### 1.3 General experimental procedure for the synthesis of 5a-b, 7a-b, 11a-b, and 15

To the mixture of acid (1 mmol) and HATU (1 mmol), *N,N*-dimethyl formamide (DMF) was added and allowed to stir at room temperature for 10 min. Then, amine (1.2 mmol) was added under nitrogen atmosphere followed by addition of DIPEA (2.5 mmol) and allowed to stir at room temperature until completion of reaction. Upon completion of the reaction as monitored by TLC, crushed ice was added to the reaction mixture. The resulting precipitate was subjected to vacuum filtration; excess water was used to wash off the insoluble solids to obtain crude solids which was purified by using column chromatography.

#### 2-(1,3-Dioxo-1H-benzo[de]isoquinolin-2(3H)-yl)acetic acid (5a)

<sup>1</sup>H NMR (500 MHz, CDCl<sub>3</sub>) δ 8.63 – 8.55 (m, 2H), 8.27 – 8.20 (m, 2H), 7.77 (dt, *J* = 8.2, 6.9 Hz, 2H), 4.93 (d, *J* = 6.5 Hz, 2H). <sup>13</sup>C NMR (125 MHz, CDCl<sub>3</sub>) δ 169.9, 163.7, 134.3, 131.6, 131.4, 131.1, 128.2, 126.9, 122.2, 77.5, 77.3, 77.0, 41.3, 40.2, 40.1, 39.9, 39.7, 39.6, 29.6. HRMS (ESI): *m/z* calculated for [M+H]<sup>+</sup> C<sub>14</sub>H<sub>10</sub>NO<sub>4</sub> 256.0604; found 256.0610.

#### 3-(1,3-Dioxo-1H-benzo[de]isoquinolin-2(3H)-yl)propanoic acid (5b)

<sup>1</sup>H NMR (500 MHz, CDCl<sub>3</sub>) δ 8.59 (d, *J* = 7.3 Hz, 2H), 8.23 (d, *J* = 8.2 Hz, 2H), 7.76 (t, *J* = 7.7 Hz, 2H), 4.50 (t, *J* = 7.7 Hz, 2H), 2.77 (t, *J* = 7.7 Hz, 2H). <sup>13</sup>C NMR (125 MHz, CDCl<sub>3</sub>) δ 173.4, 163.9, 134.1, 131.6, 131.2, 128.1, 126.9, 122.4, 40.3, 40.1, 39.9, 39.8, 39.6, 36.2, 32.6. HRMS (ESI): *m/z* calculated for [M+H]<sup>+</sup> C<sub>15</sub>H<sub>12</sub>NO<sub>4</sub> 270.0761; found 270.0764.

#### Tert-butyl 4-(2-(1,3-dioxo-1H-benzo[de]isoquinolin-2(3H)-yl)acetyl)piperazine-1-carboxylate (7a)

<sup>1</sup>H NMR (500 MHz, DMSO-*d*<sub>6</sub>) δ 8.52 (s, 2H), 8.50 (q, *J* = 1.2 Hz, 2H), 7.90 (dd, *J* = 8.2, 7.3 Hz, 2H), 4.96 (s, 2H), 3.65 (dd, *J* = 6.6, 3.8 Hz, 2H), 3.47 (q, *J* = 5.4 Hz, 4H), 3.35 (t, *J* = 5.6 Hz, 2H), 1.44 (s, 9H). <sup>13</sup>C NMR (125 MHz, DMSO-*d*<sub>6</sub>) δ 165.4, 163.7, 154.3, 135.2, 131.9, 131.4, 127.9, 127.8,

122.2, 79.7, 44.5, 41.9, 41.7, 28.5. HRMS (ESI):  $m/z$  calculated for  $[M+H]^+$   $C_{23}H_{26}N_3O_5$  424.1867; found 424.1853.

**Tert-butyl 4-(3-(1,3-dioxo-1H-benzo[de]isoquinolin-2(3H)-yl)propanoyl)piperazine-1-carboxylate (7b)**

$^1H$  NMR (500 MHz, DMSO- $d_6$ )  $\delta$  8.51 (dd,  $J = 7.3, 1.2$  Hz, 2H), 8.47 (dd,  $J = 8.2, 1.2$  Hz, 2H), 7.88 (dd,  $J = 8.2, 7.3$  Hz, 2H), 4.29 – 4.23 (m, 2H), 3.45 (td,  $J = 6.5, 3.8$  Hz, 4H), 3.37 (dd,  $J = 6.7, 3.7$  Hz, 2H), 3.33 (s, 2H), 2.73 (dd,  $J = 8.8, 7.0$  Hz, 2H), 1.42 (s, 9H).  $^{13}C$  NMR (125 MHz, DMSO- $d_6$ )  $\delta$  169.2, 163.8, 154.3, 134.9, 131.8, 131.2, 127.8, 127.7, 122.5, 79.6, 45.1, 41.2, 36.8, 31.5, 28.5. HRMS (ESI):  $m/z$  calculated for  $[M+H]^+$   $C_{24}H_{28}N_3O_5$  438.2023; found 438.2008.

**Tert-butyl 4-(2-(1,3-dioxo-1H-benzo[de]isoquinolin-2(3H)-yl)acetamido)piperidine-1-carboxylate (11a)**

$^1H$  NMR (500 MHz, DMSO- $d_6$ )  $\delta$  8.53 – 8.48 (m, 4H), 8.14 (d,  $J = 7.7$  Hz, 1H), 7.93 – 7.86 (m, 2H), 4.64 (s, 2H), 3.85 (d,  $J = 13.3$  Hz, 2H), 3.76 (m, 1H), 2.84 (s, 2H), 1.72 (dt,  $J = 12.0, 3.7$  Hz, 2H), 1.40 (s, 9H), 1.32 – 1.21 (m, 2H).  $^{13}C$  NMR (125 MHz, DMSO- $d_6$ )  $\delta$  166.3, 163.8, 154.4, 135.0, 131.8, 131.3, 128.0, 127.8, 122.5, 79.1, 46.4, 42.9, 31.8, 28.5. HRMS (ESI):  $m/z$  calculated for  $[M+H]^+$   $C_{24}H_{28}N_3O_5$  438.2023; found 438.2009.

**Tert-butyl 4-(3-(1,3-dioxo-1H-benzo[de]isoquinolin-2(3H)-yl)propanamido)piperidine-1-carboxylate (11b)**

$^1H$  NMR (500 MHz, DMSO- $d_6$ )  $\delta$  8.50 (dd,  $J = 7.3, 1.6$  Hz, 2H), 8.48 – 8.45 (m, 2H), 7.92 – 7.85 (m, 3H), 4.30 – 4.23 (m, 2H), 3.84 – 3.73 (m, 2H), 3.70 (dt,  $J = 11.1, 6.1$  Hz, 1H), 2.84 (d,  $J = 1.8$  Hz, 2H), 2.44 (td,  $J = 7.4, 1.8$  Hz, 2H), 1.67 (dd,  $J = 13.3, 4.0$  Hz, 2H), 1.38 (d,  $J = 1.8$  Hz, 9H), 1.17 (tt,  $J = 12.0, 4.5$  Hz, 2H).  $^{13}C$  NMR (125 MHz, DMSO- $d_6$ )  $\delta$  169.6, 163.8, 154.4, 134.7, 131.8, 131.1, 127.8, 127.7, 122.6, 79.1, 45.9, 37.1, 34.4, 31.6, 28.5. HRMS (ESI):  $m/z$  calculated for  $[M+H]^+$   $C_{25}H_{30}N_3O_5$  452.2180; found 452.2166.

**Tert-butyl (1-(2-(1,3-dioxo-1H-benzo[de]isoquinolin-2(3H)-yl)acetyl)piperidin-4-yl)carbamate (15)**

$^1\text{H}$  NMR (500 MHz,  $\text{CDCl}_3$ )  $\delta$  8.60 (dd,  $J = 7.3, 1.1$  Hz, 2H), 8.22 (dd,  $J = 8.3, 1.1$  Hz, 2H), 7.75 (dd,  $J = 8.2, 7.3$  Hz, 2H), 5.03 (s, 2H), 4.53 (d,  $J = 7.6$  Hz, 1H), 4.47 (d,  $J = 14.0$  Hz, 1H), 3.95 (dq,  $J = 14.2, 3.2$  Hz, 1H), 3.74 (s, 1H), 3.29 (m, 1H), 2.88 – 2.78 (m, 1H), 2.14 (d,  $J = 12.8$  Hz, 1H), 1.97 (dt,  $J = 14.5, 3.8$  Hz, 1H), 1.55 – 1.49 (m, 1H), 1.46 (s, 9H), 1.37 (dd,  $J = 12.6, 4.1$  Hz, 1H).  $^{13}\text{C}$  NMR (125 MHz,  $\text{CDCl}_3$ )  $\delta$  164.7, 164.2, 155.1, 134.2, 131.7, 131.5, 128.4, 126.9, 122.4, 47.8, 43.8, 41.4, 41.2, 32.9, 32.0, 28.4. HRMS (ESI):  $m/z$  calculated for  $[\text{M}+\text{H}]^+$   $\text{C}_{24}\text{H}_{28}\text{N}_3\text{O}_5$  438.2023; found 438.2007.

#### 1.4 General experimental procedure for the synthesis of intermediate 8a-b, 12a-b and 16

To the stirred solution of boc protected compound in DCM, add a solution of HCl in dioxan (4N) slowly under ice conditions and allowed to stir at room temperature for 12 h. After the completion of the reaction as monitored by TLC, the reaction mixture was concentrated under vacuum to obtain solid product.

#### 2-(2-Oxo-2-(piperazin-1-yl)ethyl)-1H-benzo[de]isoquinoline-1,3(2H)-dione hydrochloride (8a)

$^1\text{H}$  NMR (500 MHz,  $\text{DMSO}-d_6$ )  $\delta$  9.71 (s, 2H), 8.53 (s, 2H), 8.51 (s, 2H), 7.91 (t,  $J = 7.7$  Hz, 2H), 5.01 (s, 2H), 3.94 (t,  $J = 5.2$  Hz, 2H), 3.72 (t,  $J = 5.1$  Hz, 2H), 3.22 (s, 2H), 3.08 (s, 2H).  $^{13}\text{C}$  NMR (125 MHz,  $\text{DMSO}-d_6$ )  $\delta$  165.8, 163.7, 135.2, 131.9, 131.5, 127.9, 127.8, 122.2, 66.8, 43.2, 42.9, 41.7, 41.5, 40.5, 38.8. HRMS (ESI):  $m/z$  calculated for  $[\text{M}+\text{H}]^+$   $\text{C}_{18}\text{H}_{18}\text{N}_3\text{O}_3$  324.1343; found 324.1352.

#### 2-(3-Oxo-3-(piperazin-1-yl)propyl)-1H-benzo[de]isoquinoline-1,3(2H)-dione hydrochloride (8b)

$^1\text{H}$  NMR (500 MHz,  $\text{DMSO}-d_6$ )  $\delta$  9.70 (s, 2H), 8.52 – 8.42 (m, 4H), 7.88 (q,  $J = 6.2$  Hz, 2H), 4.26 (q,  $J = 6.5$  Hz, 2H), 3.74 (d,  $J = 5.0$  Hz, 2H), 3.70 (t,  $J = 4.6$  Hz, 2H), 3.13 (s, 2H), 3.05 (d,  $J = 6.6$  Hz, 2H), 2.76 (t,  $J = 7.9$  Hz, 2H).  $^{13}\text{C}$  NMR (125 MHz,  $\text{DMSO}-d_6$ )  $\delta$  169.4, 163.8, 134.9, 131.8, 131.2, 127.8, 127.7, 122.5, 66.8, 42.9, 42.7, 42.2, 38.1, 36.6, 31.3. HRMS (ESI):  $m/z$  calculated for  $[\text{M}+\text{H}]^+$   $\text{C}_{19}\text{H}_{20}\text{N}_3\text{O}_3$  338.1499; found 338.1513.

#### 2-(1,3-Dioxo-1H-benzo[de]isoquinolin-2(3H)-yl)-N-(piperidin-4-yl)acetamide hydrochloride (12a)

$^1\text{H}$  NMR (500 MHz,  $\text{DMSO-}d_6$ )  $\delta$  8.77 (s, 2H), 8.27 (d,  $J = 6.8$  Hz, 4H), 8.22 (d,  $J = 6.7$  Hz, 1H), 7.67 (d,  $J = 7.2$  Hz, 2H), 4.44 (s, 2H), 3.62 (s, 1H), 3.02 (d,  $J = 11.5$  Hz, 2H), 2.72 (d,  $J = 12.2$  Hz, 2H), 1.67 (d,  $J = 12.9$  Hz, 2H), 1.44 (q,  $J = 11.6$  Hz, 2H).  $^{13}\text{C}$  NMR (125 MHz,  $\text{DMSO-}d_6$ )  $\delta$  166.7, 163.8, 135.1, 131.9, 131.3, 128.0, 127.8, 122.4, 66.8, 44.3, 42.8, 42.1, 28.4. HRMS (ESI):  $m/z$  calculated for  $[\text{M}+\text{H}]^+$   $\text{C}_{19}\text{H}_{20}\text{N}_3\text{O}_3$  338.1499; found 338.1486.

**3-(1,3-Dioxo-1H-benzo[de]isoquinolin-2(3H)-yl)-N-(piperidin-4-yl)propanamide hydrochloride (12b)**

$^1\text{H}$  NMR (500 MHz,  $\text{DMSO-}d_6$ )  $\delta$  9.30 (s, 2H), 8.49 – 8.42 (m, 4H), 8.25 (d,  $J = 7.5$  Hz, 1H), 7.87 (dd,  $J = 8.2, 7.2$  Hz, 2H), 4.26 (t,  $J = 7.2$  Hz, 2H), 3.84 – 3.70 (m, 1H), 3.17 (dt,  $J = 12.3, 3.7$  Hz, 2H), 2.88 (dd,  $J = 14.7, 7.3$  Hz, 2H), 2.47 (t,  $J = 7.3$  Hz, 2H), 1.84 (dt,  $J = 12.8, 4.0$  Hz, 2H), 1.61 (qd,  $J = 10.2, 5.1$  Hz, 2H).  $^{13}\text{C}$  NMR (125 MHz,  $\text{DMSO-}d_6$ )  $\delta$  170.0, 163.8, 134.8, 131.8, 131.1, 127.8, 127.7, 122.6, 66.8, 43.6, 42.0, 37.1, 34.3, 28.2. HRMS (ESI):  $m/z$  calculated for  $[\text{M}+\text{H}]^+$   $\text{C}_{20}\text{H}_{22}\text{N}_3\text{O}_3$  352.1656; found 352.1666.

**2-(2-(4-Aminopiperidin-1-yl)-2-oxoethyl)-1H-benzo[de]isoquinoline-1,3(2H)-dione (16)**

$^1\text{H}$  NMR (500 MHz,  $\text{DMSO-}d_6$ )  $\delta$  8.52 (t,  $J = 6.2$  Hz, 4H), 8.27 (d,  $J = 21.7$  Hz, 2H), 7.91 (t,  $J = 7.7$  Hz, 2H), 5.00 (d,  $J = 16.3$  Hz, 1H), 4.91 (d,  $J = 16.8$  Hz, 1H), 4.30 (d,  $J = 13.1$  Hz, 1H), 4.14 (d,  $J = 13.5$  Hz, 1H), 4.03 (q,  $J = 7.1$  Hz, 1H), 3.27 (dd,  $J = 31.7, 18.8$  Hz, 2H), 2.81 – 2.67 (m, 1H), 2.08 (d,  $J = 12.4$  Hz, 1H), 1.61 (d,  $J = 12.8$  Hz, 1H), 1.18 (t,  $J = 7.1$  Hz, 2H).  $^{13}\text{C}$  NMR (125 MHz,  $\text{DMSO-}d_6$ )  $\delta$  165.0, 163.7, 135.2, 131.9, 131.4, 127.8, 122.2, 60.2, 47.8, 42.8, 41.7, 30.6, 29.8, 28.8, 21.3, 14.6. HRMS (ESI):  $m/z$  calculated for  $[\text{M}+\text{H}]^+$   $\text{C}_{19}\text{H}_{20}\text{N}_3\text{O}_3$  338.1499; found 338.1511.

**1.5 General experimental procedure for the synthesis of 4a-r, 9a-l, 13a-g, and 17a-e**

To the stirred solution of compound (1 mmol), triethyl amine (2 mmol) in 10 mL of ACN, was added the corresponding aryl/alkyl/hetero aryl isothiocyanates/ arylisocyanates and allowed to reflux for 1 h. After the completion of the reaction as monitored by TLC, the solvent was evaporated under reduced pressure and water was added. The resulting solid was subjected to vacuum filtration, and excess water was used to wash off the insoluble solids to obtain crude solids which was purified by using column chromatography.

**4-(2-(1,3-Dioxo-1H-benzo[de]isoquinolin-2(3H)-yl)ethyl)-N-phenylpiperazine-1-carbothioamide (4a)**

Off white solid (130 mg); yield 90%; m.p. 189-192°C; <sup>1</sup>H NMR (500 MHz, DMSO-*d*<sub>6</sub>) δ 9.30 (s, 1H), 8.53 (dt, *J* = 7.6, 2.1 Hz, 2H), 8.50 – 8.47 (m, 2H), 7.90 (td, *J* = 7.8, 2.8 Hz, 2H), 7.28 (q, *J* = 5.0 Hz, 4H), 7.10 (tt, *J* = 5.8, 2.5 Hz, 1H), 4.24 (t, *J* = 7.0 Hz, 2H), 3.85 (t, *J* = 5.2 Hz, 4H), 2.66 (t, *J* = 7.0 Hz, 2H), 2.57 (t, *J* = 5.0 Hz, 4H). <sup>13</sup>C NMR (125 MHz, DMSO-*d*<sub>6</sub>) δ 181.8, 163.9, 141.5, 134.9, 131.8, 131.3, 128.5, 127.8, 127.7, 125.7, 124.7, 122.5, 55.3, 53.0, 48.5, 37.5. HRMS (ESI): *m/z* calculated for [M+H]<sup>+</sup> C<sub>25</sub>H<sub>25</sub>N<sub>4</sub>O<sub>2</sub>S 445.1693; found 445.1687.

**N-(4-chlorophenyl)-4-(2-(1,3-dioxo-1H-benzo[de]isoquinolin-2(3H)-yl)ethyl)piperazine-1-carbothioamide (4b)**

White solid (123 mg); yield 79%; m.p. 246-248°C; <sup>1</sup>H NMR (500 MHz, DMSO-*d*<sub>6</sub>) δ 9.36 (s, 1H), 8.52 (dd, *J* = 7.2, 1.2 Hz, 2H), 8.48 (dd, *J* = 8.4, 1.2 Hz, 2H), 7.89 (dd, *J* = 8.2, 7.3 Hz, 2H), 7.35 – 7.29 (m, 4H), 4.24 (t, *J* = 6.9 Hz, 2H), 3.86 (t, *J* = 5.1 Hz, 4H), 2.66 (t, *J* = 6.9 Hz, 2H), 2.57 (t, *J* = 5.0 Hz, 4H). <sup>13</sup>C NMR (125 MHz, DMSO-*d*<sub>6</sub>) δ 181.7, 163.9, 140.5, 134.8, 131.8, 131.3, 128.6, 128.3, 127.8, 127.7, 127.2, 122.5, 55.3, 53.0, 48.5, 37.5. HRMS (ESI): *m/z* calculated for [M+H]<sup>+</sup> C<sub>25</sub>H<sub>24</sub>ClN<sub>4</sub>O<sub>2</sub>S 479.1303; found 479.1291.

**N-(3-chlorophenyl)-4-(2-(1,3-dioxo-1H-benzo[de]isoquinolin-2(3H)-yl)ethyl)piperazine-1-carbothioamide (4c)**

White solid (140 mg); yield 90%; m.p. 229-232°C; <sup>1</sup>H NMR (500 MHz, DMSO-*d*<sub>6</sub>) δ 9.39 (s, 1H), 8.52 (dd, *J* = 7.3, 1.2 Hz, 2H), 8.47 (dd, *J* = 8.3, 1.2 Hz, 2H), 7.89 (dd, *J* = 8.2, 7.2 Hz, 2H), 7.42 (t, *J* = 2.0 Hz, 1H), 7.35 – 7.24 (m, 2H), 7.17 – 7.11 (m, 1H), 4.23 (t, *J* = 6.9 Hz, 2H), 3.86 (t, *J* = 4.7 Hz, 4H), 2.68 – 2.63 (m, 2H), 2.58 (t, *J* = 4.9 Hz, 4H). <sup>13</sup>C NMR (125 MHz, DMSO-*d*<sub>6</sub>) δ 181.5, 163.9, 143.1, 134.8, 132.5, 131.8, 131.2, 130.0, 127.8, 127.7, 124.9, 124.2, 123.7, 122.5, 55.3, 53.0, 48.6, 37.5. HRMS (ESI): *m/z* calculated for [M+H]<sup>+</sup> C<sub>25</sub>H<sub>24</sub>ClN<sub>4</sub>O<sub>2</sub>S+ 479.1303; found 479.1294.

**N-(2-chlorophenyl)-4-(2-(1,3-dioxo-1H-benzo[de]isoquinolin-2(3H)-yl)ethyl)piperazine-1-carbothioamide (4d)**

White solid (135 mg); yield 87%; m.p. 213-215°C; <sup>1</sup>H NMR (500 MHz, DMSO-*d*<sub>6</sub>) δ 9.21 (s, 1H), 8.50 (d, *J* = 7.3 Hz, 2H), 8.46 (d, *J* = 8.0 Hz, 2H), 7.88 (q, *J* = 6.4 Hz, 2H), 7.48 (dd, *J* = 7.9, 1.5 Hz,



1H), 7.34 – 7.21 (m, 3H), 4.24 (q,  $J = 5.4$  Hz, 2H), 3.88 (t,  $J = 4.9$  Hz, 4H), 2.65 (t,  $J = 7.0$  Hz, 2H), 2.58 (t,  $J = 4.9$  Hz, 4H).  $^{13}\text{C}$  NMR (125 MHz, DMSO- $d_6$ )  $\delta$  182.2, 163.9, 138.8, 134.8, 132.4, 131.8, 131.6, 131.2, 129.7, 128.2, 127.8, 127.7, 127.6, 122.5, 55.3, 53.0, 48.5, 37.5. HRMS (ESI):  $m/z$  calculated for  $[\text{M}+\text{H}]^+$   $\text{C}_{25}\text{H}_{24}\text{ClN}_4\text{O}_2\text{S}$  479.1303; found 479.1295.

**4-(2-(1,3-Dioxo-1H-benzo[de]isoquinolin-2(3H)-yl)ethyl)-N-(4-methoxyphenyl)piperazine-1-carbothioamide (4e)**

White solid (114 mg); yield 74%; m.p. 196-199°C;  $^1\text{H}$  NMR (500 MHz, DMSO- $d_6$ )  $\delta$  9.17 (s, 1H), 8.51 (dd,  $J = 7.3, 1.2$  Hz, 2H), 8.46 (dd,  $J = 8.3, 1.2$  Hz, 2H), 7.88 (dd,  $J = 8.2, 7.3$  Hz, 2H), 7.18 – 7.11 (m, 2H), 6.88 – 6.83 (m, 2H), 4.23 (t,  $J = 6.9$  Hz, 2H), 3.85 (t,  $J = 4.9$  Hz, 4H), 3.74 (s, 3H), 2.65 (t,  $J = 6.9$  Hz, 2H), 2.56 (t,  $J = 5.0$  Hz, 4H).  $^{13}\text{C}$  NMR (125 MHz, DMSO- $d_6$ )  $\delta$  182.1, 163.9, 156.9, 134.8, 134.3, 131.8, 131.3, 127.9, 127.8, 127.7, 122.5, 113.7, 55.6, 55.3, 53.0, 48.3, 37.5. HRMS (ESI):  $m/z$  calculated for  $[\text{M}+\text{H}]^+$   $\text{C}_{26}\text{H}_{27}\text{N}_4\text{O}_3\text{S}$  475.1798; found 475.1783.

**4-(2-(1,3-Dioxo-1H-benzo[de]isoquinolin-2(3H)-yl)ethyl)-N-(p-tolyl)piperazine-1-carbothioamide (4f)**

Yellow solid (116 mg); yield 78%; m.p. 213-216°C;  $^1\text{H}$  NMR (500 MHz, DMSO-  $d_6$ )  $\delta$  9.22 (s, 1H), 8.52 (dd,  $J = 7.3, 1.2$  Hz, 2H), 8.48 (dd,  $J = 8.3, 1.2$  Hz, 2H), 7.89 (dd,  $J = 8.3, 7.2$  Hz, 2H), 7.14 (dt,  $J = 6.7, 2.2$  Hz, 2H), 7.11 – 7.07 (m, 2H), 4.23 (t,  $J = 6.9$  Hz, 2H), 3.84 (t,  $J = 5.0$  Hz, 4H), 2.67 – 2.63 (m, 2H), 2.56 (t,  $J = 5.0$  Hz, 4H), 2.28 (s, 3H).  $^{13}\text{C}$  NMR (125 MHz, DMSO- $d_6$ )  $\delta$  181.9, 163.9, 138.9, 134.9, 133.9, 131.8, 131.3, 128.9, 127.8, 127.7, 125.9, 122.5, 55.3, 53.0, 48.4, 37.5, 21.0. HRMS (ESI):  $m/z$  calculated for  $[\text{M}+\text{H}]^+$   $\text{C}_{26}\text{H}_{27}\text{N}_4\text{O}_2\text{S}$  459.1849; found 459.1836.

**N-(3,4-dichlorophenyl)-4-(2-(1,3-dioxo-1H-benzo[de]isoquinolin-2(3H)-yl)ethyl)piperazine-1-carbothioamide (4g)**

White solid (140 mg); yield 84%; m.p. 248-250°C;  $^1\text{H}$  NMR (500 MHz, DMSO- $d_6$ )  $\delta$  9.45 (s, 1H), 8.52 (dd,  $J = 7.2, 1.2$  Hz, 2H), 8.48 (dd,  $J = 8.3, 1.2$  Hz, 2H), 7.89 (dd,  $J = 8.2, 7.2$  Hz, 2H), 7.63 (d,  $J = 2.5$  Hz, 1H), 7.53 (d,  $J = 8.7$  Hz, 1H), 7.33 (dd,  $J = 8.7, 2.5$  Hz, 1H), 4.24 (t,  $J = 6.9$  Hz, 2H), 3.86 (t,  $J = 5.0$  Hz, 4H), 2.66 (dt,  $J = 13.3, 6.2$  Hz, 2H), 2.58 (t,  $J = 5.0$  Hz, 4H).  $^{13}\text{C}$  NMR (125 MHz, DMSO- $d_6$ )  $\delta$  181.3, 163.9, 141.8, 134.9, 131.8, 131.3, 130.4, 130.1, 127.9, 127.7, 125.6, 125.2, 125.3,

122.5, 55.2, 52.9, 48.6, 37.5. HRMS (ESI):  $m/z$  calculated for  $[M+H]^+$   $C_{25}H_{23}Cl_2N_4O_2S$  513.0913; found 513.0898.

**4-(2-(1,3-Dioxo-1H-benzo[de]isoquinolin-2(3H)-yl)ethyl)-N-ethylpiperazine-1-carbothioamide (4h)**

Off white solid (90 mg); yield 70 %; m.p. 198-201°C;  $^1H$  NMR (500 MHz, DMSO- $d_6$ )  $\delta$  8.50 (d,  $J = 7.2$  Hz, 2H), 8.46 (d,  $J = 8.2$  Hz, 2H), 7.88 (t,  $J = 7.7$  Hz, 2H), 7.63 (d,  $J = 5.4$  Hz, 1H), 4.21 (t,  $J = 7.0$  Hz, 2H), 3.71 (t,  $J = 4.9$  Hz, 4H), 3.54 – 3.46 (m, 2H), 2.61 (t,  $J = 7.0$  Hz, 2H), 2.48 (t,  $J = 5.0$  Hz, 4H), 1.09 (t,  $J = 7.1$  Hz, 3H).  $^{13}C$  NMR (125 MHz, DMSO- $d_6$ )  $\delta$  181.6, 163.9, 134.8, 131.8, 131.2, 127.8, 127.7, 122.5, 55.3, 53.0, 47.5, 40.5, 37.5, 15.0. HRMS (ESI):  $m/z$  calculated for  $[M+H]^+$   $C_{21}H_{25}N_4O_2S$  397.1693; found 397.1674.

**4-(2-(1,3-Dioxo-1H-benzo[de]isoquinolin-2(3H)-yl)ethyl)-N-isopropylpiperazine-1-carbothioamide (4i)**

White solid (96 mg); yield 72%; m.p. 182-184°C;  $^1H$  NMR (500 MHz, DMSO- $d_6$ )  $\delta$  8.50 (d,  $J = 7.3$  Hz, 2H), 8.46 (d,  $J = 8.2$  Hz, 2H), 7.88 (t,  $J = 7.7$  Hz, 2H), 7.27 (d,  $J = 7.8$  Hz, 1H), 4.52 (q,  $J = 6.8$  Hz, 1H), 4.21 (t,  $J = 7.0$  Hz, 2H), 3.75 – 3.66 (m, 4H), 2.61 (t,  $J = 7.0$  Hz, 2H), 2.50 – 2.44 (m, 4H), 1.13 (d,  $J = 6.6$  Hz, 7H).  $^{13}C$  NMR (125 MHz, DMSO- $d_6$ )  $\delta$  180.8, 163.9, 134.8, 131.8, 131.2, 127.8, 127.7, 122.5, 55.3, 53.0, 47.6, 47.5, 37.5, 22.5. HRMS (ESI):  $m/z$  calculated for  $[M+H]^+$   $C_{22}H_{27}N_4O_2S$  411.1849; found 411.1855.

**4-(2-(1,3-Dioxo-1H-benzo[de]isoquinolin-2(3H)-yl)ethyl)-N-heptylpiperazine-1-carbothioamide (4j)**

White solid (95 mg); yield 62%; m.p. 140-142°C;  $^1H$  NMR (500 MHz, DMSO- $d_6$ )  $\delta$  8.50 (dd,  $J = 7.2, 1.2$  Hz, 2H), 8.46 (dd,  $J = 8.3, 1.2$  Hz, 2H), 7.88 (dd,  $J = 8.2, 7.2$  Hz, 2H), 7.62 (t,  $J = 5.3$  Hz, 1H), 4.21 (t,  $J = 7.0$  Hz, 2H), 3.71 (t,  $J = 5.1$  Hz, 4H), 3.45 (td,  $J = 7.5, 5.3$  Hz, 2H), 2.63 – 2.57 (m, 2H), 2.48 (t,  $J = 5.0$  Hz, 4H), 1.54 – 1.47 (m, 2H), 1.26 (dq,  $J = 10.6, 6.4$  Hz, 9H), 0.88 – 0.80 (m, 3H).  $^{13}C$  NMR (125 MHz, DMSO- $d_6$ )  $\delta$  181.7, 163.9, 134.8, 131.8, 131.2, 127.8, 127.7, 122.5,

55.4, 53.0, 47.6, 45.8, 37.5, 31.7, 29.1, 29.0, 26.8, 22.5, 14.4. HRMS (ESI):  $m/z$  calculated for  $[M+H]^+$   $C_{26}H_{35}N_4O_2S$  467.2475; found 467.2473.

**N-cyclopropyl-4-(2-(1,3-dioxo-1H-benzo[de]isoquinolin-2(3H)-yl)ethyl)piperazine-1-carbothioamide (4k)**

Light brown solid (93 mg); yield 70%; m.p. 143-146°C;  $^1H$  NMR (500 MHz, DMSO- $d_6$ )  $\delta$  8.51 (d,  $J$  = 7.3 Hz, 2H), 8.47 (d,  $J$  = 8.2 Hz, 2H), 7.89 (t,  $J$  = 7.8 Hz, 2H), 7.58 (d,  $J$  = 3.4 Hz, 1H), 4.21 (p,  $J$  = 7.2 Hz, 3H), 3.69 (t,  $J$  = 5.0 Hz, 3H), 3.00 (ddt,  $J$  = 14.7, 7.3, 4.3 Hz, 1H), 2.69 – 2.62 (m, 2H), 2.61 (t,  $J$  = 7.0 Hz, 1H), 2.48 (t,  $J$  = 5.0 Hz, 3H), 0.65 (h,  $J$  = 4.6 Hz, 2H), 0.54 (p,  $J$  = 4.5 Hz, 2H).  $^{13}C$  NMR (125 MHz, DMSO- $d_6$ )  $\delta$  183.5, 163.9, 134.9, 134.9, 131.8, 131.3, 127.9, 127.7, 122.5, 55.3, 53.0, 44q.7, 37.5, 28.8, 7.2. HRMS (ESI):  $m/z$  calculated for  $[M+H]^+$   $C_{22}H_{25}N_4O_2S$  409.1693; found 409.1678.

**N-cyclopentyl-4-(2-(1,3-dioxo-1H-benzo[de]isoquinolin-2(3H)-yl)ethyl)piperazine-1-carbothioamide (4l)**

Off white solid (96 mg); yield 68%; m.p. 168-170°C;  $^1H$  NMR (500 MHz, DMSO- $d_6$ )  $\delta$  8.51 (dd,  $J$  = 7.3, 1.2 Hz, 2H), 8.48 (dd,  $J$  = 8.3, 1.1 Hz, 2H), 7.89 (t,  $J$  = 7.7 Hz, 2H), 7.31 (d,  $J$  = 7.2 Hz, 1H), 4.61 (h,  $J$  = 7.5 Hz, 1H), 4.22 (t,  $J$  = 6.9 Hz, 2H), 3.71 (t,  $J$  = 4.9 Hz, 4H), 2.62 (t,  $J$  = 7.0 Hz, 2H), 2.48 (t,  $J$  = 5.0 Hz, 4H), 1.96 – 1.82 (m, 2H), 1.69 – 1.57 (m, 2H), 1.53 – 1.41 (m, 4H).  $^{13}C$  NMR (125 MHz, DMSO- $d_6$ )  $\delta$  181.6, 163.9, 134.8, 131.8, 131.2, 127.8, 127.7, 122.5, 57.5, 55.3, 53.0, 47.7, 37.5, 32.2, 24.0. HRMS (ESI):  $m/z$  calculated for  $[M+H]^+$   $C_{24}H_{29}N_4O_2S$  437.2006; found 437.1986.

**N-cyclohexyl-4-(2-(1,3-dioxo-1H-benzo[de]isoquinolin-2(3H)-yl)ethyl)piperazine-1-carbothioamide (4m)**

White solid (110 mg); yield 75%; m.p. 113-115°C;  $^1H$  NMR (500 MHz,  $CDCl_3$ )  $\delta$  8.59 (d,  $J$  = 7.3 Hz, 2H), 8.23 (d,  $J$  = 8.2 Hz, 2H), 7.77 (t,  $J$  = 7.8 Hz, 2H), 5.31 – 5.25 (m, 1H), 4.35 (q,  $J$  = 7.6 Hz, 3H), 3.74 (t,  $J$  = 5.1 Hz, 4H), 2.75 (t,  $J$  = 6.7 Hz, 2H), 2.64 (t,  $J$  = 5.1 Hz, 4H), 2.10 (m, 2H), 1.70 (m, 2H), 1.65 (d,  $J$  = 3.9 Hz, 1H), 1.41 (m, 2H), 1.16 (m, 3H).  $^{13}C$  NMR (126 MHz,  $CDCl_3$ )  $\delta$  180.9, 164.3, 134.0, 131.6, 131.3, 128.2, 127.0, 122.6, 55.4, 54.2, 52.6, 47.2, 37.4, 33.2, 25.6, 24.9. HRMS (ESI):  $m/z$  calculated for  $[M+H]^+$   $C_{25}H_{31}N_4O_2S$  451.2162; found 451.2149.

**N-cycloheptyl-4-(2-(1,3-dioxo-1H-benzo[de]isoquinolin-2(3H)-yl)ethyl)piperazine-1-carbothioamide (4n)**

Off white solid (100 mg); yield 66%; .p. 192-194°C; <sup>1</sup>H NMR (500 MHz, DMSO-*d*<sub>6</sub>) δ 8.51 (d, *J* = 7.3 Hz, 2H), 8.48 (d, *J* = 8.3 Hz, 2H), 7.89 (t, *J* = 7.7 Hz, 2H), 7.28 (d, *J* = 7.9 Hz, 1H), 4.36 (s, 1H), 4.21 (t, *J* = 7.0 Hz, 2H), 3.70 (t, *J* = 4.8 Hz, 4H), 2.61 (t, *J* = 6.9 Hz, 2H), 2.47 (t, *J* = 5.1 Hz, 4H), 1.89 – 1.79 (m, 2H), 1.62 (d, *J* = 11.1 Hz, 2H), 1.57 – 1.43 (m, 6H), 1.42 – 1.30 (m, 2H). <sup>13</sup>C NMR (125 MHz, DMSO-*d*<sub>6</sub>) δ 180.7, 163.9, 134.8, 131.8, 131.2, 127.7, 122.5, 57.0, 55.4, 53.0, 47.7, 37.5, 34.5, 28.1, 24.5. HRMS (ESI): *m/z* calculated for [M+H]<sup>+</sup> C<sub>26</sub>H<sub>33</sub>N<sub>4</sub>O<sub>2</sub>S 465.2319; found 465.2302.

**N-(adamantan-1-yl)-4-(2-(1,3-dioxo-1H-benzo[de]isoquinolin-2(3H)-yl)ethyl)piperazine-1-carbothioamide (4o)**

Off white solid (126 mg); yield 77%; m.p. 197-200°C; <sup>1</sup>H NMR (500 MHz, CDCl<sub>3</sub>) δ 8.59 (d, *J* = 7.3 Hz, 2H), 8.22 (dd, *J* = 8.4, 4.9 Hz, 2H), 7.76 (td, *J* = 7.7, 3.3 Hz, 2H), 5.23 (s, 1H), 4.35 (t, *J* = 6.6 Hz, 2H), 3.72 (t, *J* = 5.1 Hz, 3H), 2.96 (s, 1H), 2.74 (t, *J* = 6.7 Hz, 3H), 2.63 (t, *J* = 5.1 Hz, 4H), 2.27 (d, *J* = 3.0 Hz, 5H), 2.11 (s, 3H), 1.98 (d, *J* = 2.9 Hz, 1H), 1.74 – 1.61 (m, 5H). <sup>13</sup>C NMR (125 MHz, CDCl<sub>3</sub>) δ 180.4, 164.3, 164.2, 134.0, 134.0, 131.6, 131.6, 131.3, 128.2, 127.0, 127.0, 122.7, 122.6, 77.2, 56.1, 55.4, 54.8, 53.7, 52.7, 47.1, 45.7, 43.8, 41.9, 37.4, 37.3, 36.4, 35.5, 29.7, 29.2. HRMS (ESI): *m/z* calculated for [M+H]<sup>+</sup> C<sub>29</sub>H<sub>35</sub>N<sub>4</sub>O<sub>2</sub>S 503.2475; found 503.2463.

**4-(2-(1,3-Dioxo-1H-benzo[de]isoquinolin-2(3H)-yl)ethyl)-N-(pyridin-3-yl)piperazine-1-carbothioamide (4p)**

Light pink solid (98 mg); yield 68%; m.p. 214-217°C; <sup>1</sup>H NMR (500 MHz, DMSO-*d*<sub>6</sub>) δ 9.41 (s, 1H), 8.52 (d, *J* = 7.2 Hz, 2H), 8.48 (d, *J* = 8.2 Hz, 3H), 8.29 (dd, *J* = 4.7, 1.5 Hz, 1H), 7.89 (t, *J* = 7.7 Hz, 2H), 7.72 (dt, *J* = 8.3, 2.0 Hz, 1H), 7.33 (dd, *J* = 8.2, 4.7 Hz, 1H), 4.24 (t, *J* = 6.9 Hz, 2H), 3.89 (t, *J* = 5.0 Hz, 4H), 2.67 (t, *J* = 7.0 Hz, 2H), 2.59 (t, *J* = 5.0 Hz, 4H). <sup>13</sup>C NMR (125 MHz, DMSO-*d*<sub>6</sub>) δ 181.8, 163.9, 147.1, 145.5, 138.2, 134.8, 133.2, 131.8, 131.3, 127.8, 127.7, 123.3, 122.5, 55.3, 52.9, 48.5, 37.5. HRMS (ESI): *m/z* calculated for [M+H]<sup>+</sup> C<sub>24</sub>H<sub>24</sub>N<sub>5</sub>O<sub>2</sub>S 446.1645; found 446.1638.

**4-(2-(1,3-Dioxo-1H-benzo[de]isoquinolin-2(3H)-yl)ethyl)-N-phenylpiperazine-1-carboxamide (4q)**

White solid (112 mg); yield 80%; m.p. 187-189°C; <sup>1</sup>H NMR (500 MHz, DMSO-*d*<sub>6</sub>) δ 8.51 (dd, *J* = 7.3, 1.2 Hz, 2H), 8.48 – 8.44 (m, 3H), 7.88 (dd, *J* = 8.2, 7.2 Hz, 2H), 7.47 – 7.43 (m, 2H), 7.24 – 7.19 (m, 2H), 6.93 (td, *J* = 7.3, 1.2 Hz, 1H), 4.23 (t, *J* = 6.9 Hz, 2H), 3.44 – 3.37 (m, 4H), 2.66 – 2.60 (m, 2H), 2.54 – 2.51 (m, 4H). <sup>13</sup>C NMR (125 MHz, DMSO-*d*<sub>6</sub>) δ 163.9, 155.4, 141.0, 134.8, 131.8, 131.2, 128.7, 127.8, 127.7, 122.5, 122.1, 120.1, 55.6, 53.2, 44.3, 37.5. HRMS (ESI): *m/z* calculated for [M+H]<sup>+</sup> C<sub>25</sub>H<sub>25</sub>N<sub>4</sub>O<sub>3</sub> 429.1921; found 429.1916.

**N-(4-chlorophenyl)-4-(2-(1,3-dioxo-1H-benzo[de]isoquinolin-2(3H)-yl)ethyl)piperazine-1-carboxamide (4r)**

Off white solid (125 mg); yield 83%; m.p. 218-220°C; <sup>1</sup>H NMR (500 MHz, DMSO-*d*<sub>6</sub>) δ <sup>1</sup>H NMR (500 MHz, DMSO) δ 8.61 (s, 1H), 8.51 (dd, *J* = 7.7, 4.1 Hz, 2H), 8.47 (dd, *J* = 8.1, 4.7 Hz, 2H), 7.92 – 7.84 (m, 2H), 7.52 – 7.46 (m, 2H), 7.27 (d, *J* = 8.7 Hz, 2H), 4.26 – 4.18 (m, 2H), 3.41 (t, *J* = 4.8 Hz, 4H), 2.63 (t, *J* = 7.1 Hz, 2H), 2.55 – 2.51 (m, 4H). <sup>13</sup>C NMR (125 MHz, DMSO-*d*<sub>6</sub>) δ 163.9, 155.2, 140.1, 134.8, 131.8, 131.2, 128.6, 127.7, 125.7, 122.5, 121.4, 120.3, 55.5, 53.2, 44.2, 37.5. HRMS (ESI): *m/z* calculated for [M+H]<sup>+</sup> C<sub>25</sub>H<sub>24</sub>ClN<sub>4</sub>O<sub>3</sub> 463.1531; found 463.1519.

**4-(2-(1,3-Dioxo-1H-benzo[de]isoquinolin-2(3H)-yl)acetyl)-N-phenylpiperazine-1-carbothioamide (9a)**

White solid (110 mg); yield 77%; .p. 248-250°C; <sup>1</sup>H NMR (500 MHz, DMSO-*d*<sub>6</sub>) δ 9.43 (s, 1H), 8.55 – 8.48 (m, 4H), 7.92 (dd, *J* = 8.2, 7.2 Hz, 2H), 7.36 – 7.30 (m, 4H), 7.17 – 7.10 (m, 1H), 5.01 (s, 2H), 4.10 (dd, *J* = 6.6, 3.8 Hz, 2H), 3.96 (dd, *J* = 6.7, 3.9 Hz, 2H), 3.83 (dd, *J* = 6.7, 3.9 Hz, 2H), 3.61 (dd, *J* = 6.3, 4.2 Hz, 2H). <sup>13</sup>C NMR (125 MHz, DMSO-*d*<sub>6</sub>) δ 182.2, 165.6, 163.7, 141.4, 135.2, 131.9, 131.5, 128.5, 127.9, 127.8, 125.8, 124.9, 122.2, 48.2, 47.9, 44.0, 41.8, 41.6. HRMS (ESI): *m/z* calculated for [M+H]<sup>+</sup> C<sub>25</sub>H<sub>23</sub>N<sub>4</sub>O<sub>3</sub>S 459.1485; found 459.1465.

**N-(4-chlorophenyl)-4-(2-(1,3-dioxo-1H-benzo[de]isoquinolin-2(3H)-yl)acetyl)piperazine-1-carbothioamide (9b)**

Off white solid (120 mg); yield 78%; m.p. 246-248°C; <sup>1</sup>H NMR (500 MHz, DMSO-*d*<sub>6</sub>) δ 9.48 (s, 1H), 8.53 (dd, *J* = 7.9, 3.3 Hz, 4H), 7.93 (t, *J* = 7.8 Hz, 2H), 7.56 – 7.46 (m, 2H), 7.38 (s, 4H), 5.01 (s, 2H), 4.10 (t, *J* = 5.1 Hz, 2H), 3.96 (t, *J* = 5.3 Hz, 2H), 3.83 (t, *J* = 5.3 Hz, 2H), 3.61 (t, *J* = 5.3 Hz, 2H). <sup>13</sup>C NMR (125 MHz, DMSO-*d*<sub>6</sub>) δ 182.0, 165.7, 163.7, 140.4, 135.2, 131.8, 131.5, 130.4, 128.9, 128.8, 128.4, 128.2, 127.9, 127.8, 127.4, 122.2, 48.2, 47.9, 43.9, 41.8, 41.5. HRMS (ESI): *m/z* calculated for [M+H]<sup>+</sup> C<sub>25</sub>H<sub>22</sub>ClN<sub>4</sub>O<sub>3</sub>S 493.1096; found 493.1081.

**4-(2-(1,3-Dioxo-1H-benzo[de]isoquinolin-2(3H)-yl)acetyl)-N-(p-tolyl)piperazine-1-carbothioamide (9c)**

Light brown solid (118 mg); yield 80%; m.p. 256-258°C; <sup>1</sup>H NMR (500 MHz, DMSO- *d*<sub>6</sub>) δ 9.35 (s, 1H), 8.56 – 8.50 (m, 4H), 7.92 (dd, *J* = 8.2, 7.2 Hz, 2H), 7.24 – 7.19 (m, 2H), 7.13 (d, *J* = 8.1 Hz, 2H), 5.00 (s, 2H), 4.08 (dd, *J* = 6.6, 3.8 Hz, 2H), 3.95 (dd, *J* = 6.7, 4.0 Hz, 2H), 3.82 (dd, *J* = 6.6, 3.9 Hz, 2H), 3.63 – 3.56 (m, 2H), 2.30 (s, 3H). <sup>13</sup>C NMR (125 MHz, DMSO- *d*<sub>6</sub>) δ 182.5, 165.7, 163.7, 138.8, 135.1, 134.1, 131.9, 131.4, 129.0, 127.9, 127.8, 125.9, 122.3, 48.1, 47.8, 44.0, 41.7, 41.6, 21.0. HRMS (ESI): *m/z* calculated for [M+H]<sup>+</sup> C<sub>26</sub>H<sub>25</sub>N<sub>4</sub>O<sub>3</sub>S 473.1642; found 473.1636.

**4-(2-(1,3-Dioxo-1H-benzo[de]isoquinolin-2(3H)-yl)acetyl)-N-(4-methoxyphenyl)piperazine-1-carbothioamide (9d)**

Light yellow solid (123 mg); yield 81%; m.p. 242-244°C; <sup>1</sup>H NMR (500 MHz, DMSO- *d*<sub>6</sub>) δ 9.06 (s, 1H), 8.29 (ddd, *J* = 8.3, 4.5, 1.2 Hz, 4H), 7.68 (dd, *J* = 8.2, 7.2 Hz, 2H), 6.99 – 6.94 (m, 2H), 6.67 – 6.64 (m, 2H), 4.76 (s, 2H), 3.85 (t, *J* = 5.1 Hz, 2H), 3.71 (t, *J* = 5.3 Hz, 2H), 3.58 (dd, *J* = 6.5, 3.9 Hz, 2H), 3.52 (s, 3H), 3.36 (d d, *J* = 6.8, 4.1 Hz, 2H). <sup>13</sup>C NMR (125 MHz, DMSO- *d*<sub>6</sub>) δ 182.6, 165.7, 163.7, 157.1, 135.1, 134.3, 131.9, 131.4, 127.9, 127.8, 127.8, 122.3, 113.8, 55.7, 48.0, 47.7, 44.0, 41.7, 41.6. HRMS (ESI): *m/z* calculated for [M+H]<sup>+</sup> C<sub>26</sub>H<sub>25</sub>N<sub>4</sub>O<sub>4</sub>S 489.1591; found 489.1595.

**N-(3-chlorophenyl)-4-(2-(1,3-dioxo-1H-benzo[de]isoquinolin-2(3H)-yl)acetyl)piperazine-1-carbothioamide (9e)**

Off white solid (126 mg); yield 82%; m.p. 249-252°C; <sup>1</sup>H NMR (500 MHz, DMSO- *d*<sub>6</sub>) δ 9.52 (s, 1H), 8.56 – 8.51 (m, 4H), 7.92 (t, *J* = 7.7 Hz, 2H), 7.49 (d, *J* = 2.1 Hz, 1H), 7.37 – 7.31 (m, 2H), 7.18

(dt,  $J = 7.2, 2.1$  Hz, 1H), 5.01 (s, 2H), 4.10 (t,  $J = 4.9$  Hz, 2H), 3.99 – 3.94 (m, 2H), 3.83 (t,  $J = 5.1$  Hz, 2H), 3.61 (t,  $J = 5.2$  Hz, 2H).  $^{13}\text{C}$  NMR (125 MHz, DMSO-  $d_6$ )  $\delta$  182.1, 165.7, 163.7, 143.1, 135.1, 132.6, 131.9, 131.4, 130.0, 127.9, 127.8, 125.1, 124.4, 123.9, 122.3, 48.0, 44.0, 41.7, 41.6. HRMS (ESI):  $m/z$  calculated for  $[\text{M}+\text{H}]^+$   $\text{C}_{25}\text{H}_{22}\text{ClN}_4\text{O}_3\text{S}$  493.1096; found 493.1080.

**N-cyclohexyl-4-(2-(1,3-dioxo-1H-benzo[de]isoquinolin-2(3H)-yl)acetyl)piperazine-1-carbothioamide (9f)**

White solid (113 mg); yield 78%; m.p. 240-242°C;  $^1\text{H}$  NMR (500 MHz, DMSO-  $d_6$ )  $\delta$  8.52 (d,  $J = 7.3$  Hz, 4H), 7.92 (t,  $J = 7.8$  Hz, 2H), 7.38 (d,  $J = 7.7$  Hz, 1H), 4.98 (s, 2H), 4.21 (d,  $J = 11.2$  Hz, 1H), 3.97 (t,  $J = 5.2$  Hz, 2H), 3.80 (t,  $J = 5.3$  Hz, 2H), 3.73 (t,  $J = 5.3$  Hz, 2H), 3.51 (t,  $J = 5.3$  Hz, 2H), 1.91 (d,  $J = 10.0$  Hz, 2H), 1.77 – 1.68 (m, 2H), 1.61 (d,  $J = 12.8$  Hz, 1H), 1.34 – 1.20 (m, 4H), 1.15 – 1.05 (m, 1H).  $^{13}\text{C}$  NMR (125 MHz, DMSO-  $d_6$ )  $\delta$  180.9, 165.6, 163.7, 135.2, 131.9, 131.5, 127.9, 127.8, 122.2, 55.1, 47.4, 47.0, 44.0, 41.7, 41.5, 32.5, 25.8, 25.6. HRMS (ESI):  $m/z$  calculated for  $[\text{M}+\text{H}]^+$   $\text{C}_{25}\text{H}_{29}\text{N}_4\text{O}_3\text{S}$  465.1955; found 465.1938.

**4-(3-(1,3-Dioxo-1H-benzo[de]isoquinolin-2(3H)-yl)propanoyl)-N-phenylpiperazine-1-carbothioamide (9g)**

Off white solid (120 mg); yield 84%; m.p. 216-218°C;  $^1\text{H}$  NMR (500 MHz, DMSO-  $d_6$ )  $\delta$  9.38 (s, 1H), 8.53 (d,  $J = 7.2$  Hz, 2H), 8.49 (d,  $J = 8.2$  Hz, 2H), 7.90 (t,  $J = 7.8$  Hz, 2H), 7.31 (d,  $J = 4.4$  Hz, 4H), 7.12 (td,  $J = 5.5, 2.6$  Hz, 1H), 4.30 (t,  $J = 7.8$  Hz, 2H), 4.03 – 3.96 (m, 2H), 3.94 (t,  $J = 5.4$  Hz, 2H), 3.62 (t,  $J = 5.2$  Hz, 2H), 3.58 (t,  $J = 5.4$  Hz, 2H), 2.78 (t,  $J = 7.9$  Hz, 2H).  $^{13}\text{C}$  NMR (125 MHz, DMSO-  $d_6$ )  $\delta$  182.0, 169.5, 163.9, 141.4, 134.9, 131.8, 131.2, 128.5, 127.8, 127.7, 125.8, 124.9, 122.5, 48.2, 47.9, 44.6, 41.0, 36.7, 31.6. HRMS (ESI):  $m/z$  calculated for  $[\text{M}+\text{H}]^+$   $\text{C}_{26}\text{H}_{25}\text{N}_4\text{O}_3\text{S}$  473.1642; found 473.1628.

**N-(4-chlorophenyl)-4-(3-(1,3-dioxo-1H-benzo[de]isoquinolin-2(3H)-yl)propanoyl)piperazine-1-carbothioamide (9h)**

White solid (105 mg); yield 69%; m.p. 237-239°C;  $^1\text{H}$  NMR (500 MHz, DMSO-  $d_6$ )  $\delta$  9.43 (s, 1H), 8.55 – 8.51 (m, 2H), 8.49 (d,  $J = 8.5$  Hz, 2H), 7.90 (t,  $J = 7.8$  Hz, 2H), 7.35 (s, 4H), 4.33 – 4.26 (m, 2H), 4.00 (t,  $J = 5.2$  Hz, 2H), 3.94 (t,  $J = 5.4$  Hz, 2H), 3.62 (dd,  $J = 6.2, 3.7$  Hz, 2H), 3.58 (dd,  $J = 6.8, 4.1$  Hz, 2H), 2.77 (t,  $J = 7.9$  Hz, 2H).  $^{13}\text{C}$  NMR (125 MHz, DMSO-  $d_6$ )  $\delta$  181.8, 169.5, 163.9, 140.4, 134.9, 131.8,

131.2, 128.8, 128.3, 127.8, 127.7, 127.4, 122.5, 48.2, 47.9, 44.6, 41.0, 36.7, 31.6. HRMS (ESI):  $m/z$  calculated for  $[M+H]^+$   $C_{26}H_{24}ClN_4O_3S$  507.1252 ; found 507.1249.

**4-(3-(1,3-Dioxo-1H-benzo[de]isoquinolin-2(3H)-yl)propanoyl)-N-(p-tolyl)piperazine-1-carbothioamide (9i)**

Brown solid (110 mg); yield 76%; m.p. 243-245°C;  $^1H$  NMR (500 MHz, DMSO-  $d_6$ )  $\delta$  9.30 (s, 1H), 8.52 (d,  $J = 7.2$  Hz, 2H), 8.48 (d,  $J = 8.2$  Hz, 2H), 7.89 (t,  $J = 7.8$  Hz, 2H), 7.18 (d,  $J = 8.0$  Hz, 2H), 7.11 (d,  $J = 8.1$  Hz, 2H), 4.29 (t,  $J = 7.9$  Hz, 2H), 3.98 (dd,  $J = 6.9, 3.8$  Hz, 2H), 3.92 (dd,  $J = 6.9, 4.0$  Hz, 2H), 3.63 – 3.58 (m, 2H), 3.57 (t,  $J = 3.6$  Hz, 2H), 2.77 (t,  $J = 7.9$  Hz, 2H), 2.28 (s, 3H).  $^{13}C$  NMR (125 MHz, DMSO-  $d_6$ )  $\delta$  182.3, 169.5, 163.9, 138.8, 134.8, 134.1, 131.8, 131.2, 128.9, 127.9, 127.7, 125.9, 122.6, 48.2, 47.8, 44.7, 41.1, 36.7, 31.6, 21.0. HRMS (ESI):  $m/z$  calculated for  $[M+H]^+$   $C_{27}H_{27}N_4O_3S$  487.1798; found 487.1796.

**4-(3-(1,3-Dioxo-1H-benzo[de]isoquinolin-2(3H)-yl)propanoyl)-N-(4-methoxyphenyl)piperazine-1-carbothioamide (9j)**

White solid (112 mg); yield 72%; m.p. 220-223°C;  $^1H$  NMR (500 MHz, DMSO-  $d_6$ )  $\delta$  9.25 (s, 1H), 8.51 (ddd,  $J = 20.7, 7.8, 1.2$  Hz, 4H), 7.90 (dd,  $J = 8.2, 7.2$  Hz, 2H), 7.21 – 7.16 (m, 2H), 6.92 – 6.82 (m, 2H), 4.32 – 4.26 (m, 2H), 3.96 (ddd,  $J = 28.9, 6.8, 3.9$  Hz, 4H), 3.75 (s, 3H), 3.63 – 3.55 (m, 4H), 2.80 – 2.74 (m, 2H).  $^{13}C$  NMR (125 MHz, DMSO-  $d_6$ )  $\delta$  182.2, 169.5, 163.9, 157.0, 134.9, 134.2, 131.8, 131.2, 127.9, 127.9, 127.7, 122.6, 113.7, 55.7, 48.0, 47.7, 44.6, 41.0, 36.7, 31.6. HRMS (ESI):  $m/z$  calculated for  $[M+H]^+$   $C_{27}H_{27}N_4O_4S$  503.1748; found 503.1745.

**N-(2-chlorophenyl)-4-(3-(1,3-dioxo-1H-benzo[de]isoquinolin-2(3H)-yl)propanoyl)piperazine-1-carbothioamide (9k)**

Off white solid (115 mg); yield 76%; m.p. 233-235°C;  $^1H$  NMR (500 MHz, DMSO-  $d_6$ )  $\delta$  9.32 (s, 1H), 8.52 (d,  $J = 7.3$  Hz, 2H), 8.48 (d,  $J = 8.2$  Hz, 2H), 7.89 (t,  $J = 7.8$  Hz, 2H), 7.49 (d,  $J = 7.9$  Hz, 1H), 7.37 – 7.24 (m, 3H), 4.30 (t,  $J = 7.8$  Hz, 2H), 3.99 (dt,  $J = 27.5, 5.0$  Hz, 4H), 3.61 (dt,  $J = 18.7, 5.1$  Hz, 4H), 2.78 (t,  $J = 7.8$  Hz, 2H).  $^{13}C$  NMR (126 MHz, DMSO-  $d_6$ )  $\delta$  182.4, 169.5, 163.9, 138.7, 134.9, 132.4, 131.8, 131.6, 131.2, 129.8, 128.3, 127.8, 127.7, 127.7, 122.5, 48.2, 47.9, 44.6, 41.0, 36.7, 31.6. HRMS (ESI):  $m/z$  calculated for  $[M+H]^+$   $C_{26}H_{24}ClN_4O_3S$  507.1252; found 507.1263.



**N-cyclohexyl-4-(3-(1,3-dioxo-1H-benzo[de]isoquinolin-2(3H)-yl)propanoyl)piperazine-1-carbothioamide (9I)**

Off white solid (55 mg); yield 72%; m.p. 203-205°C; <sup>1</sup>H NMR (500 MHz, DMSO- *d*<sub>6</sub>) δ 8.51 (d, *J* = 7.3 Hz, 2H), 8.48 (d, *J* = 8.2 Hz, 2H), 7.89 (t, *J* = 7.7 Hz, 2H), 7.33 (d, *J* = 7.8 Hz, 1H), 4.27 (t, *J* = 7.8 Hz, 2H), 4.23 – 4.13 (m, 1H), 3.85 (q, *J* = 5.5 Hz, 2H), 3.79 (t, *J* = 5.4 Hz, 2H), 3.53 (t, *J* = 5.3 Hz, 2H), 3.49 (t, *J* = 5.2 Hz, 2H), 2.74 (t, *J* = 7.9 Hz, 2H), 1.88 (d, *J* = 9.4 Hz, 2H), 1.71 (d, *J* = 10.7 Hz, 2H), 1.60 (d, *J* = 12.7 Hz, 1H), 1.32 – 1.19 (m, 4H), 1.10 (t, *J* = 12.4 Hz, 1H). <sup>13</sup>C NMR (125 MHz, DMSO- *d*<sub>6</sub>) δ 180.8, 169.4, 163.9, 134.9, 131.8, 131.2, 127.8, 127.7, 122.5, 55.0, 47.4, 47.0, 44.6, 41.0, 36.7, 32.5, 31.5, 25.8, 25.6. HRMS (ESI): *m/z* calculated for [M+H]<sup>+</sup> C<sub>26</sub>H<sub>31</sub>N<sub>4</sub>O<sub>3</sub>S 479.2111; found 479.2100.

**2-(1,3-Dioxo-1H-benzo[de]isoquinolin-2(3H)-yl)-N-(1-(phenylcarbamothioyl)piperidin-4-yl)acetamide (13a)**

White solid (116 mg); yield 82%; m.p. 239-241°C; <sup>1</sup>H NMR (500 MHz, DMSO- *d*<sub>6</sub>) δ 9.29 (s, 1H), 8.54 – 8.48 (m, 4H), 8.19 (d, *J* = 7.8 Hz, 1H), 7.91 (dd, *J* = 8.2, 7.2 Hz, 2H), 7.31 – 7.24 (m, 4H), 7.10 (tq, *J* = 6.7, 2.1 Hz, 1H), 4.66 (s, 2H), 4.59 (d, *J* = 13.5 Hz, 2H), 3.94 (q, *J* = 7.7 Hz, 1H), 3.28 – 3.22 (m, 2H), 1.82 (dd, *J* = 13.4, 4.2 Hz, 2H), 1.48 – 1.37 (m, 2H). <sup>13</sup>C NMR (125 MHz, DMSO- *d*<sub>6</sub>) δ 181.5, 166.4, 163.8, 141.6, 135.0, 131.9, 131.3, 128.4, 128.0, 127.8, 125.6, 124.6, 122.5, 47.4, 46.3, 43.0, 31.8. HRMS (ESI): *m/z* calculated for [M+H]<sup>+</sup> C<sub>26</sub>H<sub>25</sub>N<sub>4</sub>O<sub>3</sub>S 473.1642; found 473.1637.

**N-(1-((4-chlorophenyl)carbamothioyl)piperidin-4-yl)-2-(1,3-dioxo-1H-benzo[de]isoquinolin-2(3H)-yl)acetamide (13b)**

Off white solid (112 mg); yield 79%; m.p. 256-259°C; <sup>1</sup>H NMR (500 MHz, DMSO-*d*<sub>6</sub>) δ 9.35 (s, 1H), 8.51 (t, *J* = 7.0 Hz, 4H), 8.19 (d, *J* = 7.8 Hz, 1H), 7.91 (t, *J* = 7.7 Hz, 2H), 7.32 (q, *J* = 8.5 Hz, 4H), 4.66 (s, 2H), 4.58 (d, *J* = 13.2 Hz, 2H), 3.95 (s, 1H), 3.27 (d, *J* = 12.7 Hz, 2H), 1.88 – 1.76 (m, 2H), 1.44 (q, *J* = 12.0 Hz, 2H). <sup>13</sup>C NMR (125 MHz, DMSO-*d*<sub>6</sub>) δ 181.2, 166.4, 163.8, 140.6, 135.0, 131.8, 131.3, 128.5, 128.3, 128.0, 127.8, 127.2, 122.5, 47.5, 46.2, 43.0, 40.5, 40.4, 40.3, 40.2, 40.2, 40.1, 40.0, 39.9, 39.8, 39.7, 39.5, 31.8. HRMS (ESI): *m/z* calculated for [M+H]<sup>+</sup> C<sub>26</sub>H<sub>24</sub>ClN<sub>4</sub>O<sub>3</sub>S 507.1252; found 507.1241.

**N-(1-(cyclopentylcarbamothioyl)piperidin-4-yl)-2-(1,3-dioxo-1H-benzo[de]isoquinolin-2(3H)-yl)acetamide (13c)**

Light brown solid (105 mg); yield 76%; m.p. 247-250°C; <sup>1</sup>H NMR (500 MHz, DMSO-*d*<sub>6</sub>) δ 8.50 (ddd, *J* = 8.4, 4.7, 1.2 Hz, 4H), 8.13 (d, *J* = 7.9 Hz, 1H), 7.90 (dd, *J* = 8.2, 7.2 Hz, 2H), 7.31 (d, *J* = 7.2 Hz, 1H), 4.64 (s, 2H), 4.61 – 4.56 (m, 1H), 4.52 (d, *J* = 13.5 Hz, 2H), 3.87 (td, *J* = 9.7, 5.3 Hz, 1H), 3.08 (ddd, *J* = 14.0, 11.8, 2.6 Hz, 2H), 1.93 – 1.82 (m, 2H), 1.72 (dd, *J* = 13.0, 3.8 Hz, 2H), 1.64 (pd, *J* = 7.4, 4.6 Hz, 2H), 1.52 – 1.42 (m, 4H), 1.31 (qd, *J* = 11.5, 3.9 Hz, 2H). <sup>13</sup>C NMR (126 MHz, DMSO) δ 181.0, 166.3, 163.8, 135.0, 131.8, 131.3, 128.0, 127.7, 122.5, 57.6, 46.7, 46.4, 43.0, 32.3, 31.7, 24.0. HRMS (ESI): *m/z* calculated for [M+H]<sup>+</sup> C<sub>25</sub>H<sub>29</sub>N<sub>4</sub>O<sub>3</sub>S 465.1955; found 465.1944.

**N-(1-(cyclohexylcarbamothioyl)piperidin-4-yl)-2-(1,3-dioxo-1H-benzo[de]isoquinolin-2(3H)-yl)acetamide (13d)**

Light yellow solid (112 mg); yield 78%; m.p. 252-255°C; <sup>1</sup>H NMR (500 MHz, DMSO-*d*<sub>6</sub>) δ 8.50 (dd, *J* = 8.0, 4.7 Hz, 4H), 8.14 (d, *J* = 7.8 Hz, 1H), 7.90 (t, *J* = 7.7 Hz, 2H), 7.23 (d, *J* = 7.8 Hz, 1H), 4.63 (s, 2H), 4.51 (d, *J* = 13.5 Hz, 2H), 4.16 (s, 1H), 3.87 (s, 1H), 3.07 (t, *J* = 12.5 Hz, 2H), 1.83 (d, *J* = 9.3 Hz, 2H), 1.76 – 1.65 (m, 4H), 1.59 (d, *J* = 12.7 Hz, 1H), 1.32 (t, *J* = 12.4 Hz, 2H), 1.27 – 1.15 (m, 4H), 1.06 (d, *J* = 11.8 Hz, 1H). <sup>13</sup>C NMR (125 MHz, DMSO-*d*<sub>6</sub>) δ 180.2, 166.3, 163.8, 135.0, 131.9, 131.3, 128.0, 127.8, 122.5, 55.0, 46.6, 46.4, 43.0, 32.6, 31.7, 25.8, 25.6. HRMS (ESI): *m/z* calculated for [M+H]<sup>+</sup> C<sub>26</sub>H<sub>31</sub>N<sub>4</sub>O<sub>3</sub>S 479.2111; found 479.2102.

**N-(1-(cycloheptylcarbamothioyl)piperidin-4-yl)-2-(1,3-dioxo-1H-benzo[de]isoquinolin-2(3H)-yl)acetamide (13e)**

Off white solid (95 mg); yield 65%; m.p. 233-235°C; <sup>1</sup>H NMR (500 MHz, DMSO-*d*<sub>6</sub>) δ 8.51 (dd, *J* = 7.7, 4.2 Hz, 4H), 8.13 (d, *J* = 7.8 Hz, 1H), 7.90 (t, *J* = 7.7 Hz, 2H), 7.28 (d, *J* = 7.8 Hz, 1H), 4.63 (s, 2H), 4.51 (d, *J* = 13.6 Hz, 2H), 4.34 (td, *J* = 9.4, 5.0 Hz, 1H), 3.93 – 3.79 (m, 1H), 3.07 (t, *J* = 12.5 Hz, 2H), 1.86 – 1.78 (m, 2H), 1.76 – 1.68 (m, 2H), 1.66 – 1.58 (m, 2H), 1.57 – 1.43 (m, 6H), 1.38 (ddd, *J* = 15.9, 11.2, 8.0 Hz, 2H), 1.28 (dd, *J* = 18.0, 7.7 Hz, 2H). <sup>13</sup>C NMR (126 MHz, DMSO) δ 180.1, 166.3, 163.8, 135.0, 131.8, 131.3, 128.0, 127.8, 122.5, 57.2, 46.7, 46.5, 43.0, 34.6, 31.7, 28.1, 24.5. HRMS (ESI): *m/z* calculated for [M+H]<sup>+</sup> C<sub>27</sub>H<sub>33</sub>N<sub>4</sub>O<sub>3</sub>S 493.2268; found 493.2252.

**3-(1,3-Dioxo-1H-benzo[de]isoquinolin-2(3H)-yl)-N-(1-(phenylcarbamothioyl)piperidin-4-yl)propanamide (13f)**

White solid (110 mg); yield 79%; m.p. 240-243°C; <sup>1</sup>H NMR (500 MHz, DMSO-*d*<sub>6</sub>) δ 9.27 (s, 1H), 8.51 (dd, *J* = 7.3, 1.1 Hz, 2H), 8.48 (dd, *J* = 8.4, 1.2 Hz, 2H), 7.97 (d, *J* = 7.7 Hz, 1H), 7.89 (dd, *J* = 8.2, 7.2 Hz, 2H), 7.31 – 7.22 (m, 4H), 7.09 (tt, *J* = 7.1, 1.5 Hz, 1H), 4.50 (d, *J* = 13.3 Hz, 2H), 4.29 (dd, *J* = 8.0, 6.7 Hz, 2H), 3.92 – 3.83 (m, 1H), 3.29 – 3.23 (m, 2H), 2.47 (t, *J* = 7.4 Hz, 2H), 1.82 – 1.72 (m, 2H), 1.40 – 1.29 (m, 2H). <sup>13</sup>C NMR (125 MHz, DMSO-*d*<sub>6</sub>) δ 181.6, 169.7, 163.8, 141.6, 134.7, 131.8, 131.1, 128.4, 127.9, 127.7, 125.6, 124.6, 122.7, 47.4, 45.8, 37.1, 34.5, 31.6. HRMS (ESI): *m/z* calculated for [M+H]<sup>+</sup> C<sub>27</sub>H<sub>27</sub>N<sub>4</sub>O<sub>3</sub>S 487.1798; found 487.1803.

**N-(1-((4-chlorophenyl)carbamothioyl)piperidin-4-yl)-3-(1,3-dioxo-1H-benzo[de]isoquinolin-2(3H)-yl)propanamide (13g)**

White solid (115 mg); yield 77%; m.p. 248-251°C; <sup>1</sup>H NMR (500 MHz, DMSO-*d*<sub>6</sub>) δ 9.33 (s, 1H), 8.49 (ddd, *J* = 16.7, 7.8, 1.2 Hz, 4H), 7.98 (d, *J* = 7.7 Hz, 1H), 7.91 – 7.84 (m, 2H), 7.36 – 7.31 (m, 2H), 7.31 – 7.25 (m, 2H), 4.50 (d, *J* = 13.3 Hz, 2H), 4.29 (t, *J* = 7.3 Hz, 2H), 3.91 – 3.85 (m, 1H), 3.30 – 3.25 (m, 2H), 2.47 (t, *J* = 7.4 Hz, 2H), 1.78 (dd, *J* = 13.1, 4.4 Hz, 2H), 1.38 – 1.28 (m, 2H). <sup>13</sup>C NMR (125 MHz, DMSO-*d*<sub>6</sub>) δ 181.2, 169.7, 163.8, 140.6, 134.8, 131.8, 131.1, 128.5, 128.3, 127.9, 127.7, 127.2, 122.6, 47.4, 45.7, 37.1, 34.4, 31.6. HRMS (ESI): *m/z* calculated for [M+H]<sup>+</sup> C<sub>27</sub>H<sub>26</sub>ClN<sub>4</sub>O<sub>3</sub>S 521.1409 ; found 521.1390.

**1-(1-(2-(1,3-Dioxo-1H-benzo[de]isoquinolin-2(3H)-yl)acetyl)piperidin-4-yl)-3-phenylthiourea (17a)**

Light brown solid (112 mg); yield 79%; m.p. 289-292°C; <sup>1</sup>H NMR (500 MHz, DMSO-*d*<sub>6</sub>) δ 9.44 (s, 1H), 8.54 – 8.49 (m, 4H), 7.91 (t, *J* = 7.8 Hz, 2H), 7.85 (s, 1H), 7.47 – 7.42 (m, 2H), 7.35 – 7.30 (m, 2H), 7.11 (tt, *J* = 7.3, 1.2 Hz, 1H), 5.01 – 4.86 (m, 2H), 4.43 (s, 1H), 4.22 (d, *J* = 13.5 Hz, 1H), 4.06 (d, *J* = 14.0 Hz, 1H), 2.84 (t, *J* = 12.5 Hz, 1H), 2.12 – 2.04 (m, 1H), 1.96 (d, *J* = 12.1 Hz, 1H), 1.63 – 1.52 (m, 1H), 1.42 – 1.32 (m, 2H). <sup>13</sup>C NMR (125 MHz, DMSO-*d*<sub>6</sub>) δ 180.0, 164.9, 163.7, 135.2, 131.9, 131.4, 129.0, 127.8, 122.2, 51.1, 43.7, 41.7, 41.2, 32.0, 31.2. HRMS (ESI): *m/z* calculated for [M+H]<sup>+</sup> C<sub>26</sub>H<sub>25</sub>N<sub>4</sub>O<sub>3</sub>S 473.1642; found 473.1626.

**1-Cyclopentyl-3-(1-(2-(1,3-dioxo-1H-benzo[de]isoquinolin-2(3H)-yl)acetyl)piperidin-4-yl)thiourea (17b)**

Off white solid (92 mg); yield 66%; m.p. 225-228°C; <sup>1</sup>H NMR (500 MHz, DMSO-*d*<sub>6</sub>) δ 8.51 (d, *J* = 7.7 Hz, 4H), 7.91 (t, *J* = 7.8 Hz, 2H), 7.33 (s, 1H), 7.24 (s, 1H), 5.01 – 4.87 (m, 2H), 4.31 (s, 2H), 4.16 (s, 1H), 4.02 (d, *J* = 13.7 Hz, 1H), 2.81 (d, *J* = 14.5 Hz, 1H), 2.03 (d, *J* = 12.5 Hz, 1H), 1.89 (dd, *J* = 12.5, 6.7 Hz, 3H), 1.63 (s, 2H), 1.58 – 1.44 (m, 3H), 1.39 (d, *J* = 10.5 Hz, 2H), 1.25 (d, *J* = 22.2 Hz, 1H). <sup>13</sup>C NMR (125 MHz, DMSO-*d*<sub>6</sub>) δ 187.5, 164.9, 163.7, 135.2, 131.9, 131.4, 127.8, 122.2, 43.6, 41.7, 41.2, 32.7, 32.5, 31.7, 23.8. HRMS (ESI): *m/z* calculated for [M+H]<sup>+</sup> C<sub>25</sub>H<sub>29</sub>N<sub>4</sub>O<sub>3</sub>S 465.1955; found 465.1941.

**1-Cyclohexyl-3-(1-(2-(1,3-dioxo-1H-benzo[de]isoquinolin-2(3H)-yl)acetyl)piperidin-4-yl)thiourea (17c)**

White solid (110 mg); yield 77%; m.p. 257-260°C; <sup>1</sup>H NMR (500 MHz, DMSO-*d*<sub>6</sub>) δ 8.52 (d, *J* = 7.4 Hz, 4H), 7.92 (t, *J* = 7.6 Hz, 2H), 7.30 (s, 1H), 7.20 (s, 1H), 5.02–4.84 (m, 2H), 4.30 (s, 1H), 4.16 (d, *J* = 12.4 Hz, 1H), 4.02 (d, *J* = 14.0 Hz, 2H), 2.83 (s, 1H), 2.04 (d, *J* = 12.6 Hz, 1H), 1.87 (d, *J* = 13.7 Hz, 3H), 1.67 (d, *J* = 12.8 Hz, 2H), 1.55 (s, 1H), 1.50 – 1.38 (m, 2H), 1.29 (q, *J* = 12.7 Hz, 3H), 1.17 (d, *J* = 11.1 Hz, 3H). <sup>13</sup>C NMR (125 MHz, DMSO-*d*<sub>6</sub>) δ 181.4, 163.7, 135.2, 131.4, 127.8, 122.2, 41.7, 41.2, 40.5, 40.3, 32.8, 32.5, 25.7, 25.0. HRMS (ESI): *m/z* calculated for [M+H]<sup>+</sup> C<sub>26</sub>H<sub>31</sub>N<sub>4</sub>O<sub>3</sub>S 479.2111; found 479.2100.

**1-Cycloheptyl-3-(1-(2-(1,3-dioxo-1H-benzo[de]isoquinolin-2(3H)-yl)acetyl)piperidin-4-yl)thiourea (17d)**

Off white solid (112 mg); yield 76%; m.p. 270-273°C; <sup>1</sup>H NMR (500 MHz, DMSO-*d*<sub>6</sub>) δ 8.51 (d, *J* = 7.7 Hz, 4H), 7.91 (t, *J* = 7.8 Hz, 2H), 7.26 (dd, *J* = 15.4, 7.9 Hz, 2H), 5.00 – 4.87 (m, 2H), 4.29 (s, 1H), 4.16 (d, *J* = 14.0 Hz, 2H), 4.01 (d, *J* = 13.8 Hz, 1H), 2.84 (t, *J* = 12.5 Hz, 1H), 2.05 (d, *J* = 12.7 Hz, 1H), 1.95 – 1.82 (m, 3H), 1.55 (dq, *J* = 18.9, 9.5 Hz, 6H), 1.45 (p, *J* = 9.4 Hz, 6H), 1.25 (d, *J* = 12.7 Hz, 1H). <sup>13</sup>C NMR (125 MHz, DMSO-*d*<sub>6</sub>) δ 184.5, 164.9, 163.7, 135.2, 131.9, 131.4, 127.9, 127.8, 122.2, 43.6, 41.7, 41.2, 34.7, 32.5, 31.7, 28.2, 24.1. HRMS (ESI): *m/z* calculated for [M+H]<sup>+</sup> C<sub>27</sub>H<sub>33</sub>N<sub>4</sub>O<sub>3</sub>S 493.2268; found 493.2256.

**1-(Adamantan-1-yl)-3-(1-(2-(1,3-dioxo-1H-benzo[de]isoquinolin-2(3H)-yl)acetyl)piperidin-4-yl)thiourea(17e)**

White solid (95 mg); yield 70%; m.p. 223-225°C; <sup>1</sup>H NMR (500 MHz, DMSO) δ 8.52 (d, *J* = 7.7 Hz, 4H), 7.92 (t, *J* = 7.7 Hz, 2H), 7.30 (d, *J* = 7.6 Hz, 1H), 6.90 (s, 1H), 5.00 – 4.89 (m, 2H), 4.37 – 4.23 (m, 1H), 4.11 (d, *J* = 13.3 Hz, 1H), 3.99 (d, *J* = 13.8 Hz, 1H), 2.87 (t, *J* = 12.1 Hz, 1H), 2.18 (s, 6H), 2.04 (s, 4H), 1.91 (d, *J* = 12.4 Hz, 1H), 1.63 (s, 6H), 1.40 (t, *J* = 12.4 Hz, 1H), 1.21 (q, *J* = 11.5 Hz, 1H). <sup>13</sup>C NMR (125 MHz, DMSO-*d*<sub>6</sub>) δ 180.2, 164.9, 163.7, 135.2, 131.4, 127.8, 122.2, 53.2, 49.5, 43.6, 41.7, 41.1, 36.5, 32.5, 31.7, 29.5. HRMS (ESI): *m/z* calculated for [M+H]<sup>+</sup> C<sub>30</sub>H<sub>35</sub>N<sub>4</sub>O<sub>3</sub>S 531.2424; found 531.2410

**1.6. Bacterial strains and media**

The ESKAP panel of bacteria consists of *Escherichia coli* ATCC 25922, *Staphylococcus aureus* ATCC 29213, *Klebsiella pneumoniae* BAA-1705, *Acinetobacter baumannii* BAA 1605 and *Pseudomonas aeruginosa* ATCC 27853. NRS10100, NRS10119, NRS10129, NRS10186, NRS10191, NRS10192, NRS193, NRS194, NRS198 are MRSA strains while VRS1, VRS4, VRS12 are VRSA strains. These strains were procured from BEI/NARSA/ATCC (Biodefense and Emerging Infections Research Resources Repository/ Network on Antimicrobial Resistance in *Staphylococcus aureus*/American Type Culture Collection, U.S.A.). These strains are usually cultivated on Mueller-Hinton Agar (MHA). A single colony was picked from MHA plate, inoculated in Mueller-Hinton cation supplemented broth II (CA-MHB), and incubated overnight at 37 °C while shaking for 18-24 h to get the starter culture. *M. tuberculosis* H37Rv ATCC 27294 and other NTM's were cultured in Middlebrook 7H9 (Difco, Becton, NJ, U.S.A.) media supplemented with 10% (v/v) A.D.C. (Bovine Serum Albumin, Dextrose, NaCl), 0.2% (v/v) glycerol and 0.05% (v/v) Tween-80 (ADC-Tween-80).

**1.6.1 Antibiotic susceptibility testing against bacterial pathogen panel**

Antibiotic susceptibility testing was performed on the newly synthesised compounds using conventional CLSI criteria to determine the MIC [1,2]. MIC of a compound is defined as the concentration at which there is no visible bacterial growth. Mueller-Hinton cation-enriched broth was used to cultivate bacterial cultures (CAMHB). After measuring the optical density

(OD<sub>600</sub>) of the cultures, they were diluted to ~ 10<sup>6</sup>cfu/mL. This inoculum was placed in a microtitre plate with a series of test wells containing varying concentrations of the substance under test ranging from 64-0.5 µg/mL. The cells with medium (without compound and cells) and Levofloxacin as a reference standard serve as controls. Plates were incubated at 37°C for 16-18 hours before MIC values were determined by the lack or presence of visible growth. MIC determinations were made three times separately for each chemical, each time using duplicate samples.

### **1.6.2 Antibiotic susceptibility testing against pathogenic mycobacteria**

The broth microdilution technique was used to investigate antimycobacterial susceptibility on newly synthesised compounds (**Table 1**) [3,4]. Stock solutions of test and control substances at 10 mg/mL in DMSO were produced and kept at -20 °C. Mycobacterial cultures were injected in Middlebrook 7H9 enriched (Difco, Becton, NJ, U.S.A.) media supplemented with 10% ADC-Tween-80 (Bovine Serum Albumin, Dextrose, 0.2 percent glycerol, and 0.05 percent Tween-80) at OD<sub>600</sub>, then diluted to ~10<sup>6</sup>cfu/mL [5]. The newly synthesised compounds were evaluated in a 96-well round bottom microtitre plate with 2.5 mL of each concentration added per well in a two-fold serial diluted way. After that, 97.5 mL of bacterial suspension and appropriate controls were added to each well containing the test chemical. The resazurin-based dye Presto blue (Thermo Fisher, U.S.A.) was employed to visually identify active compounds. The lowest concentration of the active substance that prevented observable development after an incubation period was established to be the MIC of the active compound. MIC determinations were repeated three times with duplicate samples for each compound. For Mtb, the MIC plates were incubated at 37 °C for 7 days for Mtb and 72 h for NTM's.

### **1.6.3 Cell cytotoxicity assay**

Using the MTT assay the newly synthesised active compounds were tested for cell toxicity against Vero cells[6]. ~10<sup>3</sup> cells per well were sown in a 96-well plate and incubated at 37 °C with 5% CO<sub>2</sub>. After 24 hours, compounds ranging from 5 to 100 mg/L were introduced and incubated for 72 hours at 37 °C in a 5% CO<sub>2</sub> environment. After the incubation period, each well received 5 mg/L MTT and was incubated for another 4 hours at 37 °C. The rest of the medium

was thrown away. The formazan crystals were solubilised with 0.1 mL DMSO, and the O.D. was measured at 540 nm to compute the  $CC_{50}$ . The  $CC_{50}$  value is the lowest concentration of a chemical that reduces cell viability by 50%. Doxorubicin was used as positive control and each experiment was repeated in triplicate.

#### **1.6.4. Time kill study**

The bactericidal activity was assessed by the time-kill method[7]. *S. aureus* ATCC 29213 cells were diluted up to  $\sim 10^6$ cfu/mL and treated with compound for concentrations corresponding to 1X and 10X of MIC of 4l, 4m, 4n, 17b and Vancomycin in MHB in triplicate and incubated at 37 °C. 100 mL samples were collected after time intervals of 0 h, 1 h, 6 h, and 24 h and serially diluted in PBS and plated on T.S.A. followed by incubation at 37 °C for 18-20 h. Kill curves were constructed by counting the colonies from plates and plotting the cfu/mL of surviving bacteria at each time point in the presence and absence of the compound[8].

### **1.7 Molecular modelling studies**

**1.7.1 Molecular Docking study-** The molecular docking studies were performed by using Maestro (Schrodinger release 2022-1, L.L.C., New York, NY, U.S.A.)[9]. The crystal structure of *S. aureus* DNA gyrase complexed with GSK299423 (PDB ID 2XCS) was obtained from RCSB PDB and prepared by using Protein preparation wizard in maestro. In protein preparation wizard, hydrogen atoms were added, crystal waters beyond 5Å and cocrystal ligands were removed. Other default parameters like pH ionization, optimization and energy minimization was accomplished using OPLS4 force field method. After protein preparation, receptor grid was generated using receptor grid generation module by removing cocrystal. Then, Ligands were prepared by using chemdraw and converted into SDF file, transferred to maestro and prepared by Ligprep module[10]. Finally docking studies on potent compounds were performed using extra precision (XP) docking mode on generated receptor grid.

**1.7.2 In silico ADME studies** Physicochemical and pharmacokinetic properties such as molecular weight, octanol/water coefficient, percentage of oral absorption, hydrogen bond donors (<5), hydrogen bond acceptor (<10) were calculated by QikProp module of Schrodinger software.

This helps in studying the pharmacokinetic parameters such as absorption, distribution, metabolism and excretion (ADME)[11,12]

**Table ST1.** MIC ( $\mu\text{g/mL}$ ) values of synthesized derivatives against bacterial pathogen panel.

| S. no | Code | MIC ( $\mu\text{g/mL}$ )     |                                |                                  |                                 |                                    |
|-------|------|------------------------------|--------------------------------|----------------------------------|---------------------------------|------------------------------------|
|       |      | <i>E. coli</i><br>ATCC 25922 | <i>S. aureus</i><br>ATCC 29213 | <i>K. pneumoniae</i><br>BAA 1705 | <i>A. baumannii</i><br>BAA 1605 | <i>P. aeruginosa</i><br>ATCC 27853 |
| 1     | 4a   | >64                          | 2                              | >64                              | >64                             | >64                                |
| 2     | 4b   | >64                          | >64                            | >64                              | >64                             | >64                                |
| 3     | 4c   | >64                          | >64                            | >64                              | >64                             | >64                                |
| 4     | 4d   | >64                          | >64                            | >64                              | >64                             | >64                                |
| 5     | 4e   | >64                          | >64                            | >64                              | >64                             | >64                                |
| 6     | 4f   | >64                          | >64                            | >64                              | >64                             | >64                                |
| 7     | 4g   | >64                          | >64                            | >64                              | >64                             | >64                                |
| 8     | 4h   | >64                          | >64                            | >64                              | >64                             | >64                                |
| 9     | 4i   | >64                          | >64                            | >64                              | >64                             | >64                                |
| 10    | 4j   | >64                          | >64                            | >64                              | >64                             | >64                                |
| 11    | 4k   | >64                          | >64                            | >64                              | >64                             | >64                                |
| 12    | 4l   | >64                          | 0.125                          | >64                              | >64                             | >64                                |
| 13    | 4m   | >64                          | 0.125                          | >64                              | >64                             | >64                                |
| 14    | 4n   | >64                          | 0.25                           | >64                              | >64                             | >64                                |
| 15    | 4o   | >64                          | >64                            | >64                              | >64                             | >64                                |
| 16    | 4p   | >64                          | >64                            | >64                              | >64                             | >64                                |
| 17    | 4q   | >64                          | 8                              | >64                              | >64                             | >64                                |
| 18    | 4r   | >64                          | >64                            | >64                              | >64                             | >64                                |
| 19    | 9a   | >64                          | >64                            | >64                              | >64                             | >64                                |
| 20    | 9b   | >64                          | >64                            | >64                              | >64                             | >64                                |
| 21    | 9c   | >64                          | >64                            | >64                              | >64                             | >64                                |



|    |              |        |                |     |     |     |
|----|--------------|--------|----------------|-----|-----|-----|
| 22 | <b>9d</b>    | >64    | >64            | >64 | >64 | >64 |
| 23 | <b>9e</b>    | >64    | >64            | >64 | >64 | >64 |
| 24 | <b>9f</b>    | >64    | <b>0.5</b>     | >64 | >64 | >64 |
| 25 | <b>9g</b>    | >64    | >64            | >64 | >64 | >64 |
| 26 | <b>9h</b>    | >64    | >64            | >64 | >64 | >64 |
| 27 | <b>9i</b>    | >64    | >64            | >64 | >64 | >64 |
| 28 | <b>9j</b>    | >64    | >64            | >64 | >64 | >64 |
| 29 | <b>9k</b>    | >64    | >64            | >64 | >64 | >64 |
| 30 | <b>9l</b>    | >64    | <b>1</b>       | >64 | >64 | >64 |
| 31 | <b>13a</b>   | >64    | <b>4</b>       | >64 | >64 | >64 |
| 32 | <b>13b</b>   | >64    | >64            | >64 | >64 | >64 |
| 33 | <b>13c</b>   | >64    | >64            | >64 | >64 | >64 |
| 34 | <b>13d</b>   | >64    | <b>0.25</b>    | >64 | >64 | >64 |
| 35 | <b>13e</b>   | >64    | <b>0.5</b>     | >64 | >64 | >64 |
| 36 | <b>13f</b>   | >64    | >64            | >64 | >64 | >64 |
| 37 | <b>13g</b>   | >64    | >64            | >64 | >64 | >64 |
| 38 | <b>17a</b>   | >64    | <b>0.5</b>     | >64 | >64 | >64 |
| 39 | <b>17b</b>   | >64    | <b>0.03125</b> | >64 | >64 | >64 |
| 40 | <b>17c</b>   | >64    | <b>0.125</b>   | >64 | >64 | >64 |
| 41 | <b>17d</b>   | >64    | <b>0.25</b>    | >64 | >64 | >64 |
| 42 | <b>17e</b>   | >64    | <b>4</b>       | >64 | >64 | >64 |
|    | Levofloxacin | 0.0078 | 0.0625         | 64  | 4   | 0.5 |

**Table ST2.** MIC ( $\mu\text{g/mL}$ ) of synthesized derivatives against mycobacterial pathogen panel.

| S. no | Code | MIC ( $\mu\text{g/mL}$ ) |                                    |                                  |                                  |
|-------|------|--------------------------|------------------------------------|----------------------------------|----------------------------------|
|       |      | Mtb H37Rv<br>ATCC 27294  | <i>M. abscessus</i> AT<br>CC 19977 | <i>M. fortuitum</i><br>ATCC 6841 | <i>M. chelonae</i><br>ATCC 35752 |
| 1     | 4a   | >64                      | >64                                | >64                              | >64                              |
| 2     | 4b   | >64                      | >64                                | >64                              | >64                              |
| 3     | 4c   | >64                      | >64                                | >64                              | >64                              |
| 4     | 4d   | >64                      | >64                                | >64                              | >64                              |
| 5     | 4e   | >64                      | >64                                | >64                              | >64                              |
| 6     | 4f   | >64                      | >64                                | >64                              | >64                              |
| 7     | 4g   | >64                      | >64                                | >64                              | >64                              |
| 8     | 4h   | <b>64</b>                | >64                                | >64                              | >64                              |
| 9     | 4i   | >64                      | >64                                | >64                              | >64                              |
| 10    | 4j   | <b>64</b>                | >64                                | >64                              | >64                              |
| 11    | 4k   | >64                      | >64                                | >64                              | >64                              |
| 12    | 4l   | <b>2</b>                 | >64                                | >64                              | >64                              |
| 13    | 4m   | <b>4</b>                 | >64                                | >64                              | >64                              |
| 14    | 4n   | >64                      | >64                                | >64                              | >64                              |
| 15    | 4o   | >64                      | >64                                | >64                              | >64                              |
| 16    | 4p   | >64                      | >64                                | >64                              | >64                              |
| 17    | 4q   | <b>32</b>                | >64                                | >64                              | >64                              |
| 18    | 4r   | <b>8</b>                 | >64                                | >64                              | >64                              |
| 19    | 9a   | <b>16</b>                | >64                                | >64                              | >64                              |
| 20    | 9b   | <b>8</b>                 | >64                                | >64                              | >64                              |
| 21    | 9c   | <b>64</b>                | >64                                | >64                              | >64                              |
| 22    | 9d   | <b>64</b>                | >64                                | >64                              | >64                              |
| 23    | 9e   | <b>32</b>                | >64                                | >64                              | >64                              |
| 24    | 9f   | >64                      | >64                                | >64                              | >64                              |

|                |              |           |     |      |      |
|----------------|--------------|-----------|-----|------|------|
| 25             | <b>9g</b>    | <b>32</b> | >64 | >64  | >64  |
| 26             | <b>9h</b>    | <b>64</b> | >64 | >64  | >64  |
| 27             | <b>9i</b>    | >64       | >64 | >64  | >64  |
| 28             | <b>9j</b>    | <b>8</b>  | >64 | >64  | >64  |
| 29             | <b>9k</b>    | >64       | >64 | >64  | >64  |
| 30             | <b>9l</b>    | >64       | >64 | >64  | >64  |
| 31             | <b>13a</b>   | >64       | >64 | >64  | >64  |
| 32             | <b>13b</b>   | >64       | >64 | >64  | >64  |
| 33             | <b>13c</b>   | >64       | >64 | >64  | >64  |
| 34             | <b>13d</b>   | >64       | >64 | >64  | >64  |
| 35             | <b>13e</b>   | >64       | >64 | >64  | >64  |
| 36             | <b>13f</b>   | <b>64</b> | >64 | >64  | >64  |
| 37             | <b>13g</b>   | >64       | >64 | >64  | >64  |
| 38             | <b>17a</b>   | >64       | >64 | >64  | >64  |
| 39             | <b>17b</b>   | >64       | >64 | >64  | >64  |
| 40             | <b>17c</b>   | >64       | >64 | >64  | >64  |
| 41             | <b>17d</b>   | >64       | >64 | >64  | >64  |
| 42             | <b>17e</b>   | <b>32</b> | >64 | >64  | >64  |
| Standard drugs | Isoniazid    | 0.03      | NT  | NT   | NT   |
|                | Rifampicin   | 0.03      | NT  | NT   | NT   |
|                | Streptomycin | 1         | NT  | NT   | NT   |
|                | Ethambutol   | 2         | NT  | NT   | NT   |
|                | Levofloxacin | 0.6       | 2   | 0.06 | 0.06 |
|                | Amikacin     | 0.5       | 8   | 0.5  | 0.5  |

**Table ST3.** ADME profile predicted by QikProp

| S.no | ADME parameters                                                     | Range or recommended values | Compound <b>17b</b> |
|------|---------------------------------------------------------------------|-----------------------------|---------------------|
| 1    | Rule of five (Number of violations of Lipinski's rule of five)      | Maximum is 4                | 0                   |
| 2    | PSA (Van der Waals surface area of polar nitrogen and oxygen atoms) | 7.0-200.0                   | 109.86              |
| 3    | SASA (Total solvent accessible surface area in square angstroms)    | 300-1000                    | 798.178             |
| 4    | Molecular Weight                                                    | 0-500                       | 464.581             |
| 5    | Dipole moment                                                       | 1.0-12.5                    | 9.189               |
| 6    | Donor H.B.                                                          | 0-6                         | 2                   |
| 7    | Acceptor H.B.                                                       | 2-20                        | 8.5                 |
| 8    | QPlogKhsa (Prediction of binding to human serum albumin)            | -1.5-1.5                    | 0.314               |
| 9    | QPlogPo/w (Predicted octanol/water partition coefficient)           | -2.0-6.5                    | 3.665               |
| 10   | QPpolrz (Predicted polarizability in cubic angstroms)               | 13.0-70.0                   | 51.227              |
| 11   | QPlogBB (Predicted brain/ blood partition coefficient)              | -3.0-1.2                    | -0.853              |
| 12   | QPlogKp (Predicted skin permeability)                               | -8.0--1.0                   | -2.411              |
| 13   | QPlogHERG (Predicted IC50 value for blockage of HERG K+ channels)   | Concern below -5            | -5.018              |
| 14   | QPPCaco (Predicted apparent Caco-2 cell permeability in nm/sec)     | <25 is poor, >500 is great  | 543.258             |
| 15   | P.O.A. (Predicted human oral absorption on 0–100% scale)            | <25% is poor, >80% is high  | 100                 |

## 2. $^1\text{H}$ NMR, $^{13}\text{C}$ NMR and HRMS spectra

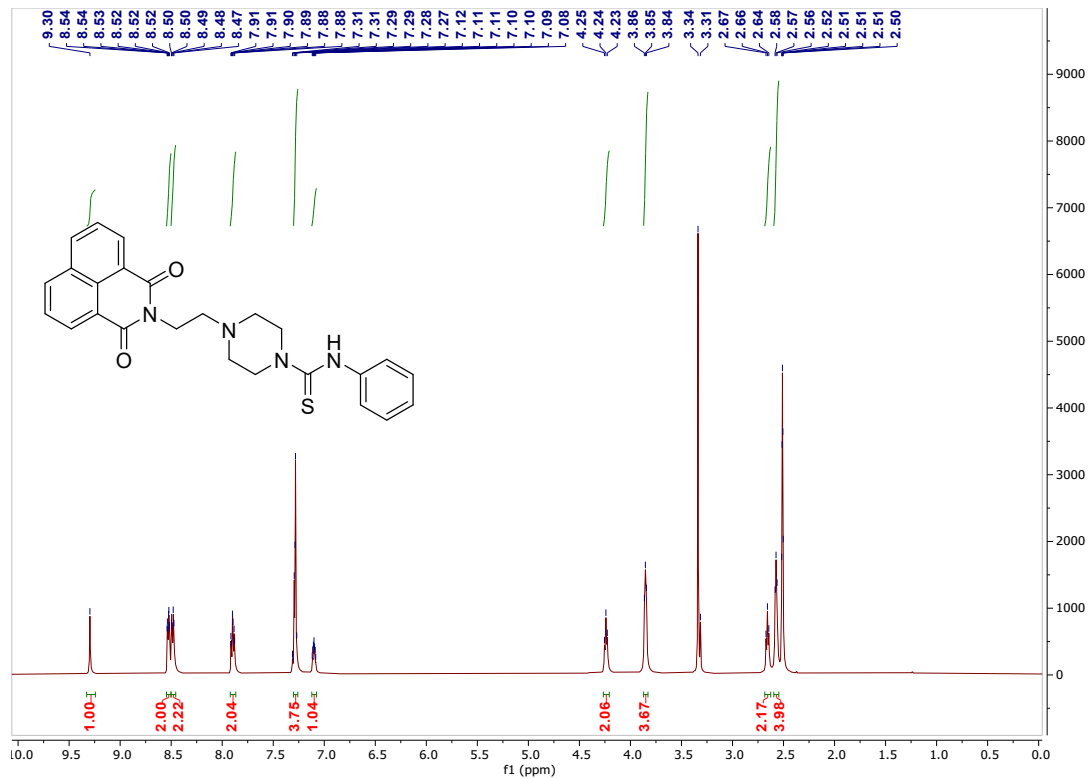

$^1\text{H}$  spectrum for compound **4a** (500 MHz:  $\text{DMSO-}d_6$ )

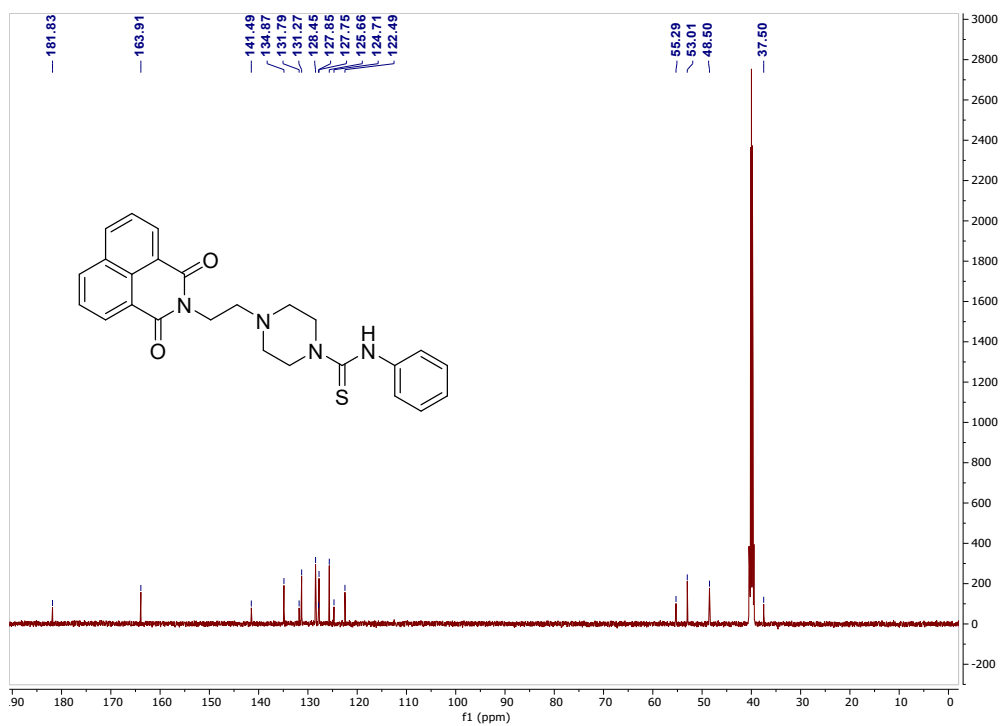

$^{13}\text{C}$  spectrum for compound **4a** (125 MHz:  $\text{DMSO-}d_6$ )

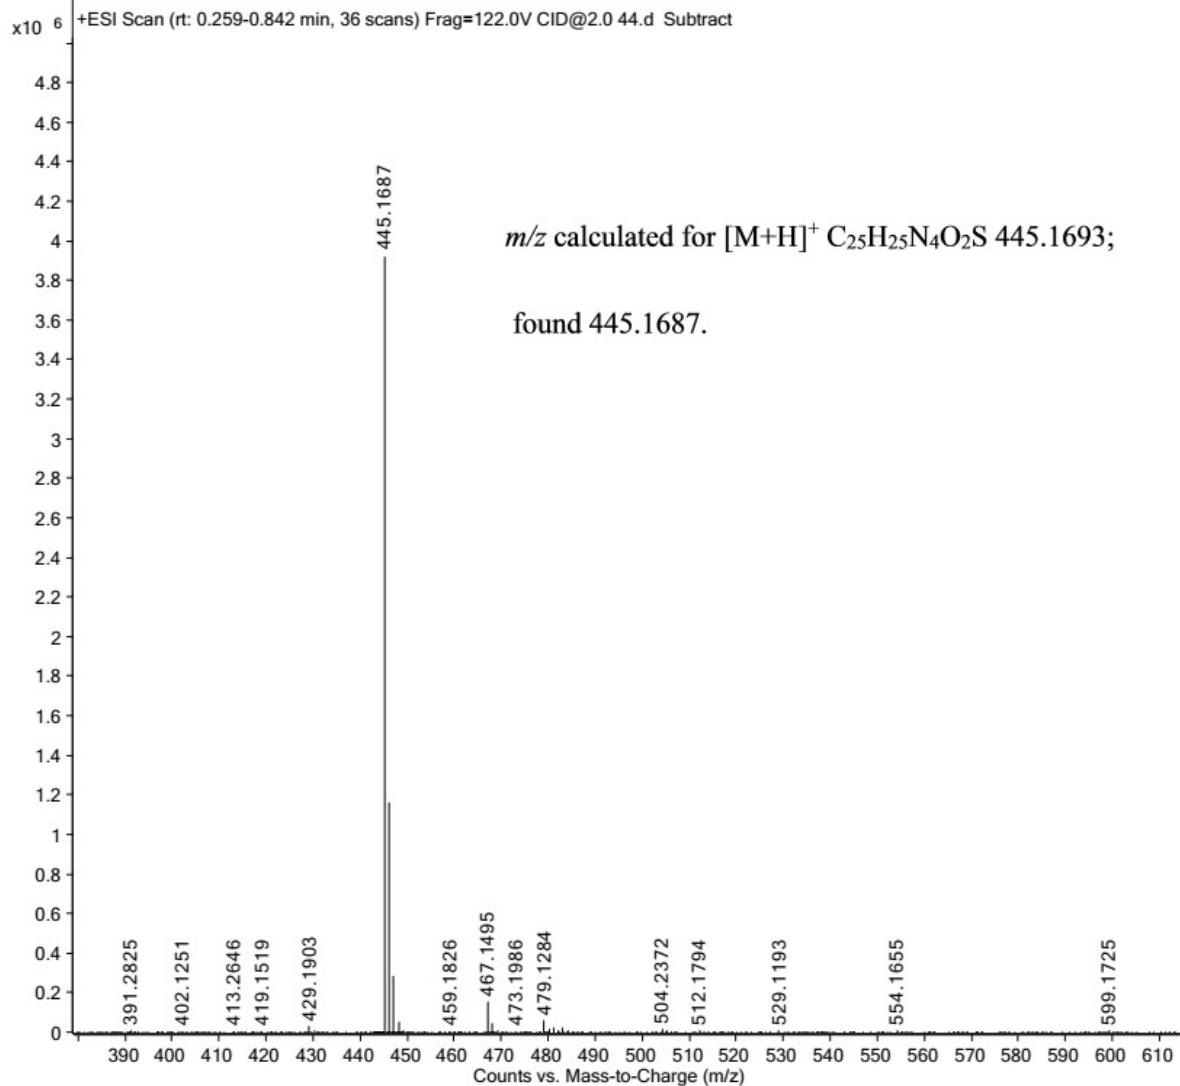

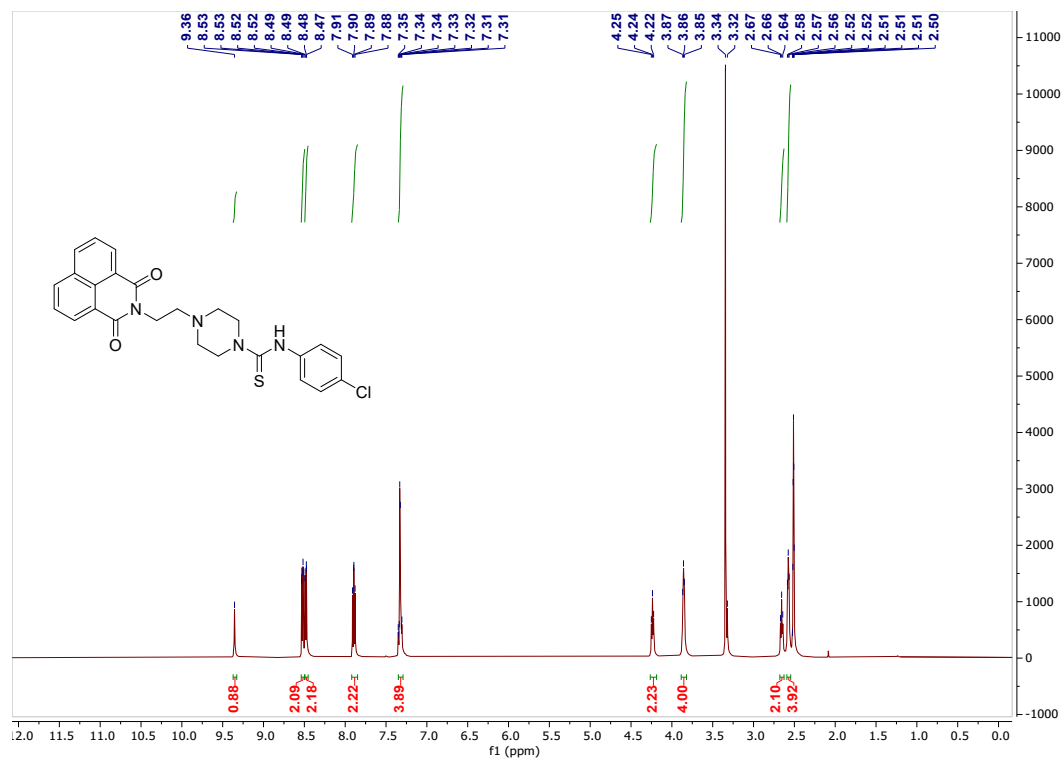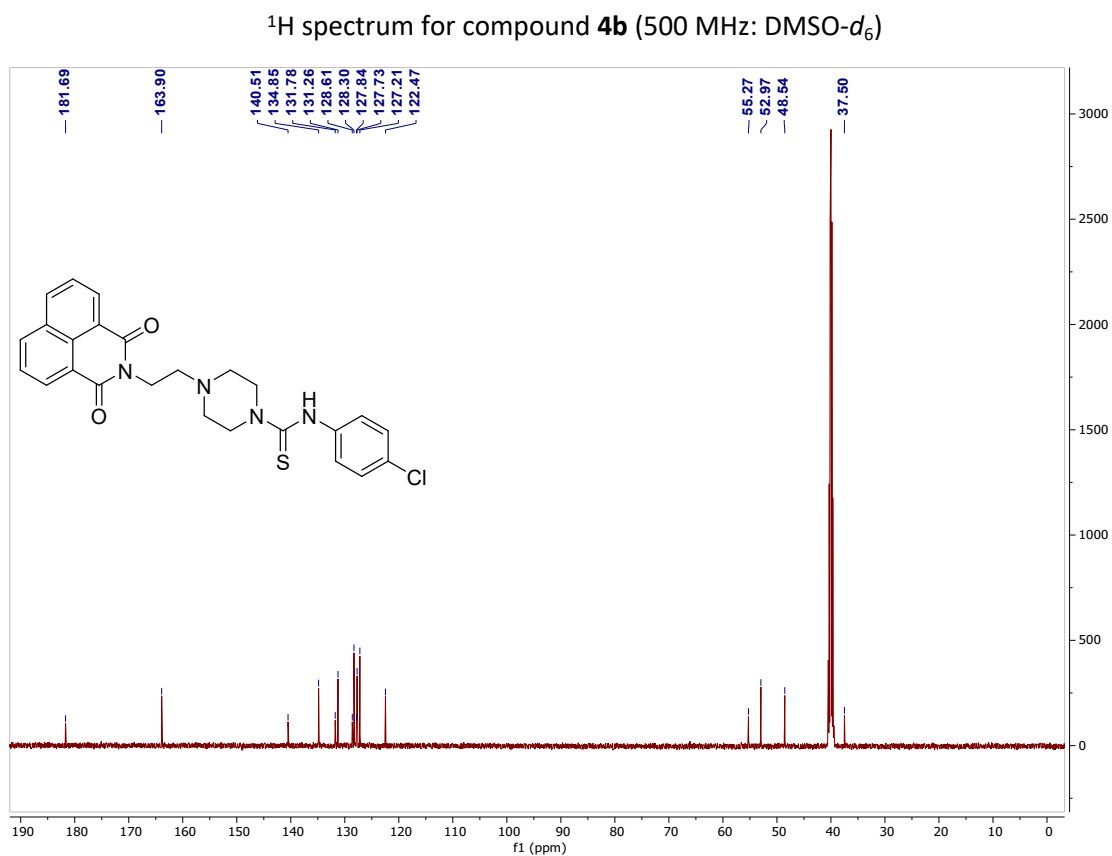

**<sup>13</sup>C spectrum for compound **4b** (125 MHz: DMSO-*d*<sub>6</sub>)**

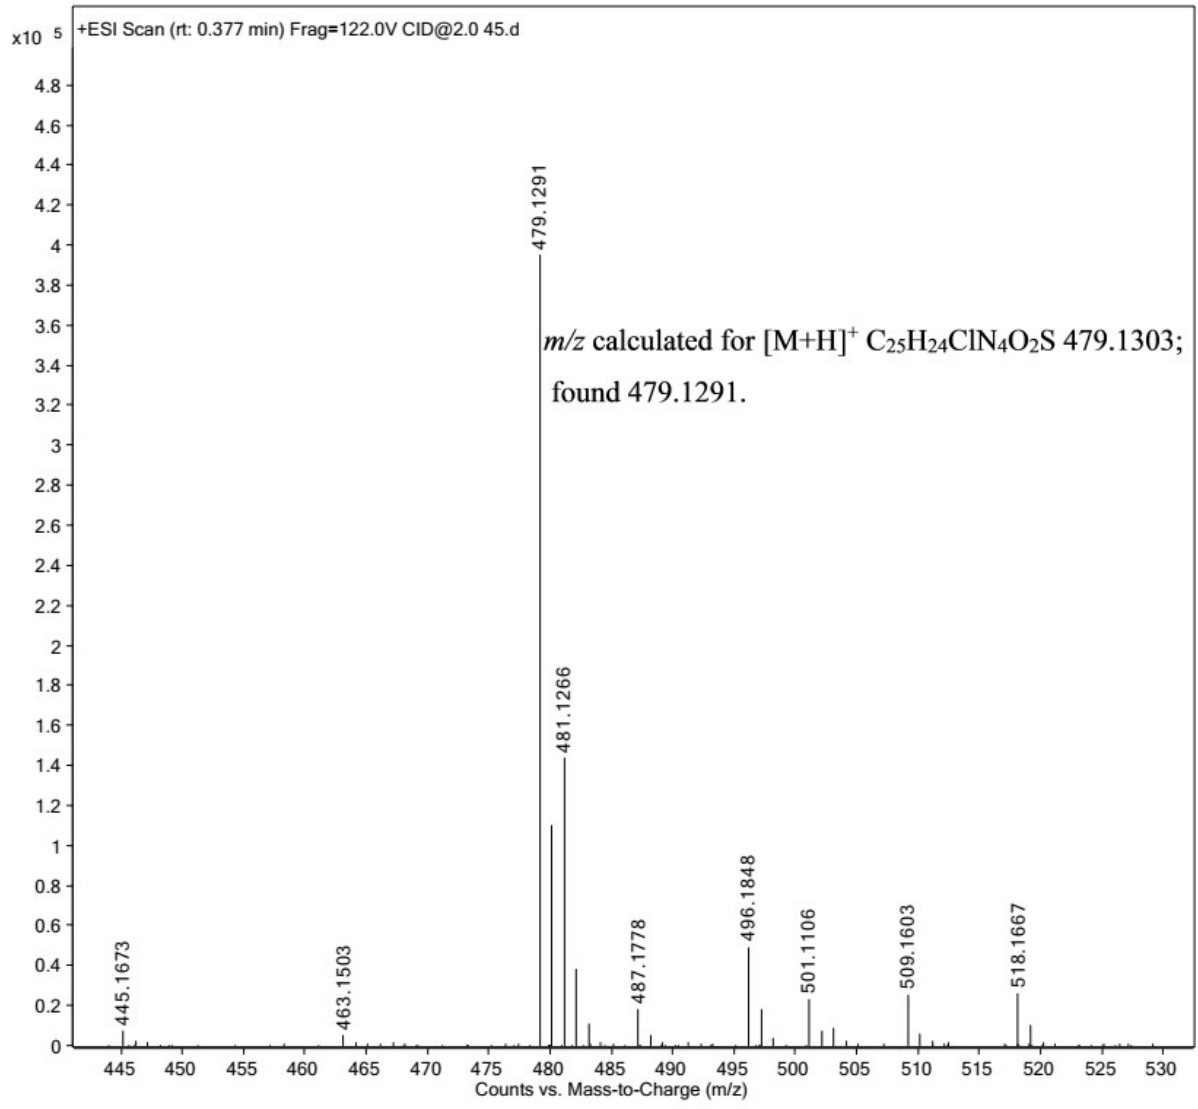



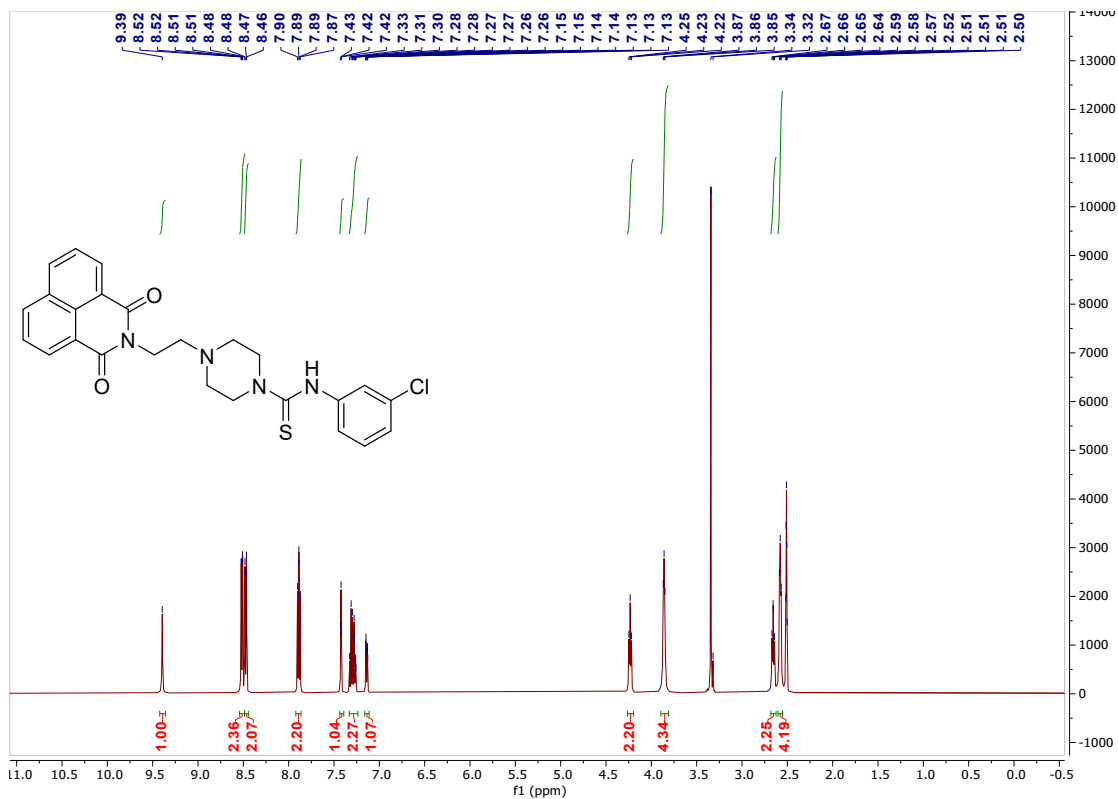

<sup>1</sup>H spectrum for compound 4c (500 MHz: DMSO-*d*<sub>6</sub>)

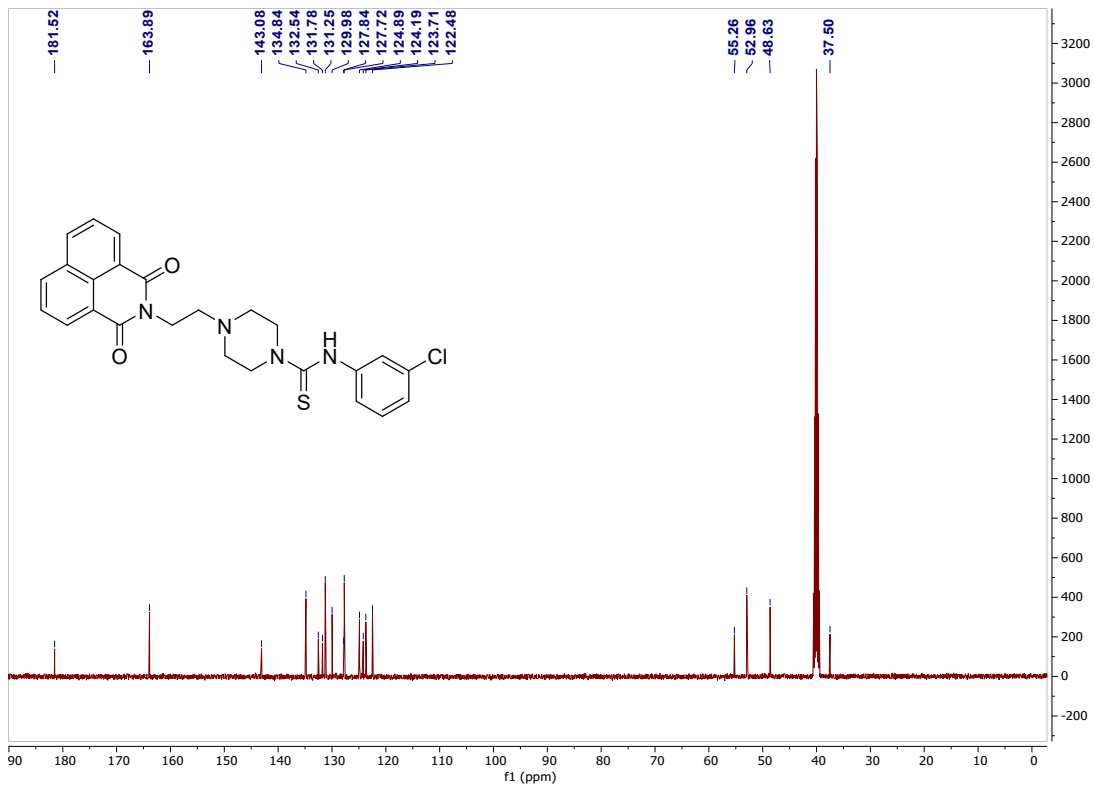

<sup>13</sup>C spectrum for compound 4c (125 MHz: DMSO-*d*<sub>6</sub>)

+ESI Scan (rt: 0.114-0.580 min, 29 scans) Frag=177.0V CID@2.0 AA-112.d Subtract

$m/z$  calculated for  $[M+H]^+$   $C_{25}H_{24}ClN_4O_2S^+$  479.1303; found 479.1294.

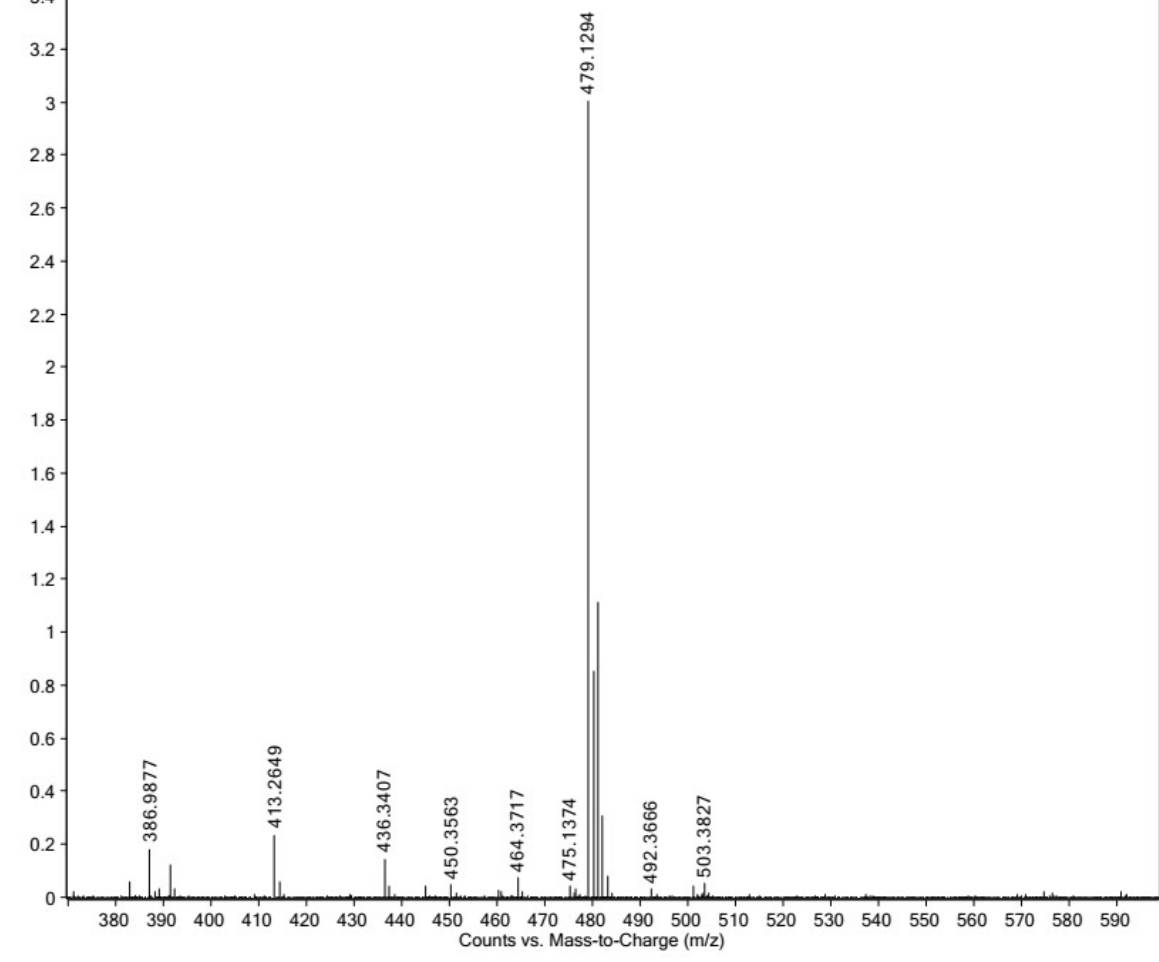

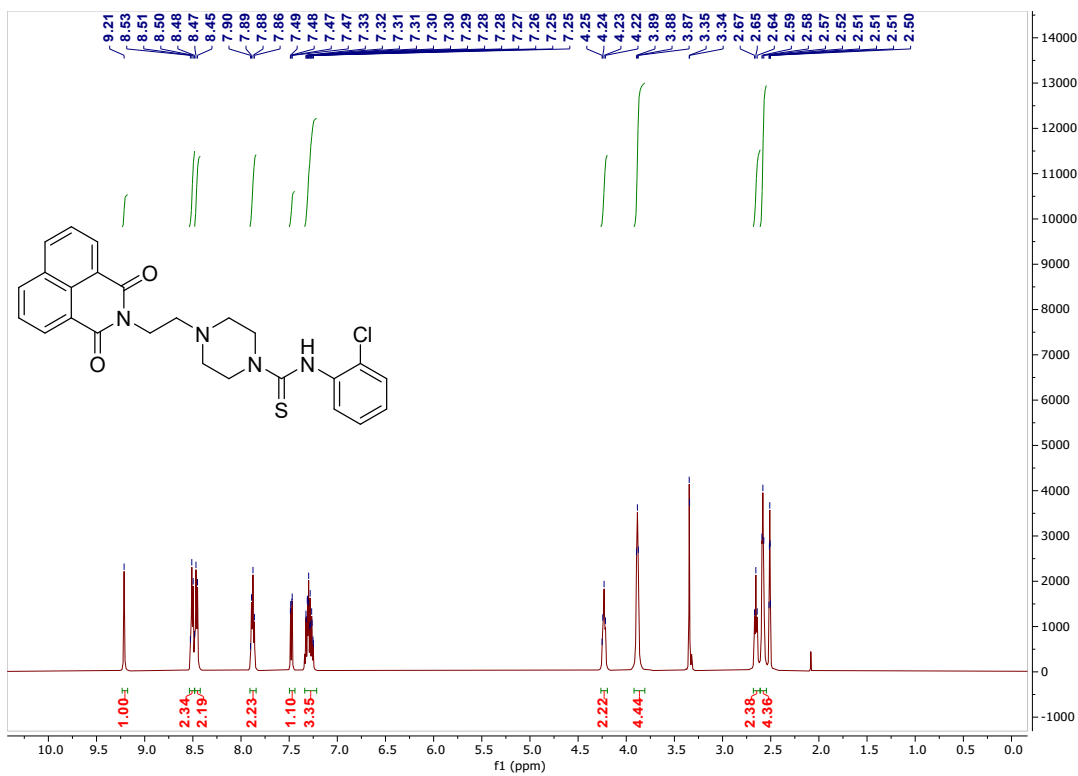

<sup>1</sup>H spectrum for compound 4d (500 MHz: DMSO-d<sub>6</sub>)

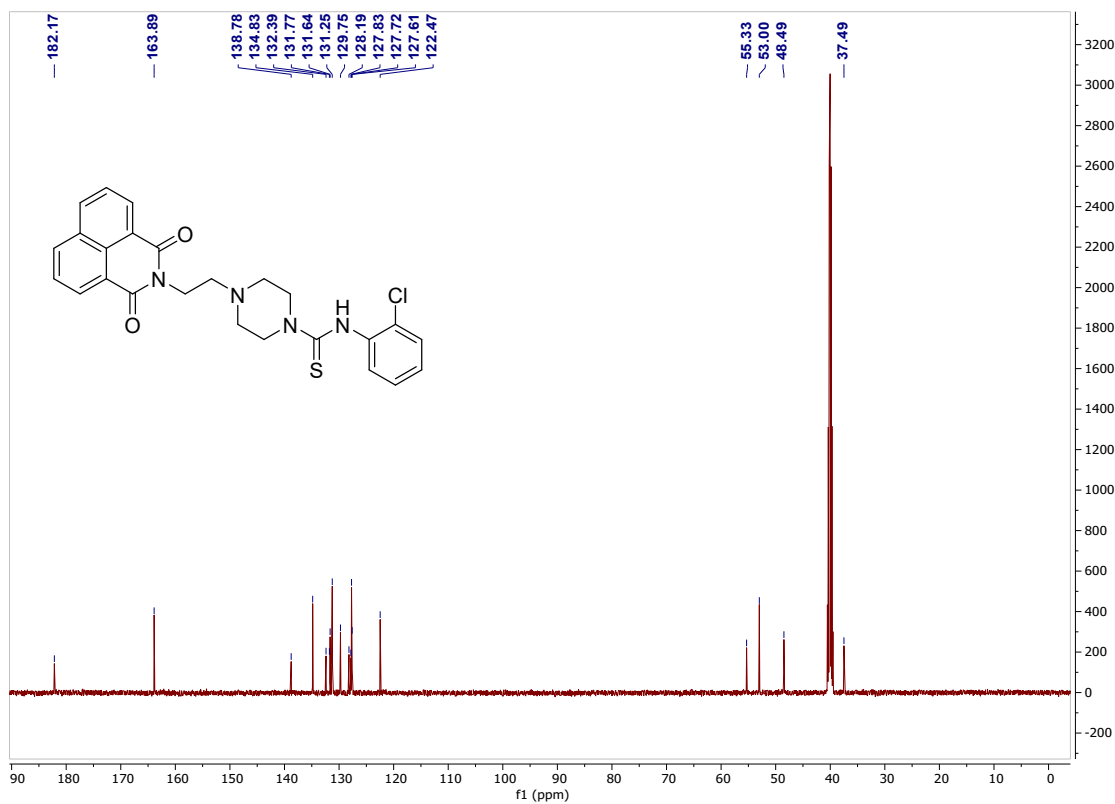

<sup>13</sup>C spectrum for compound 4d (125 MHz: DMSO-d<sub>6</sub>)

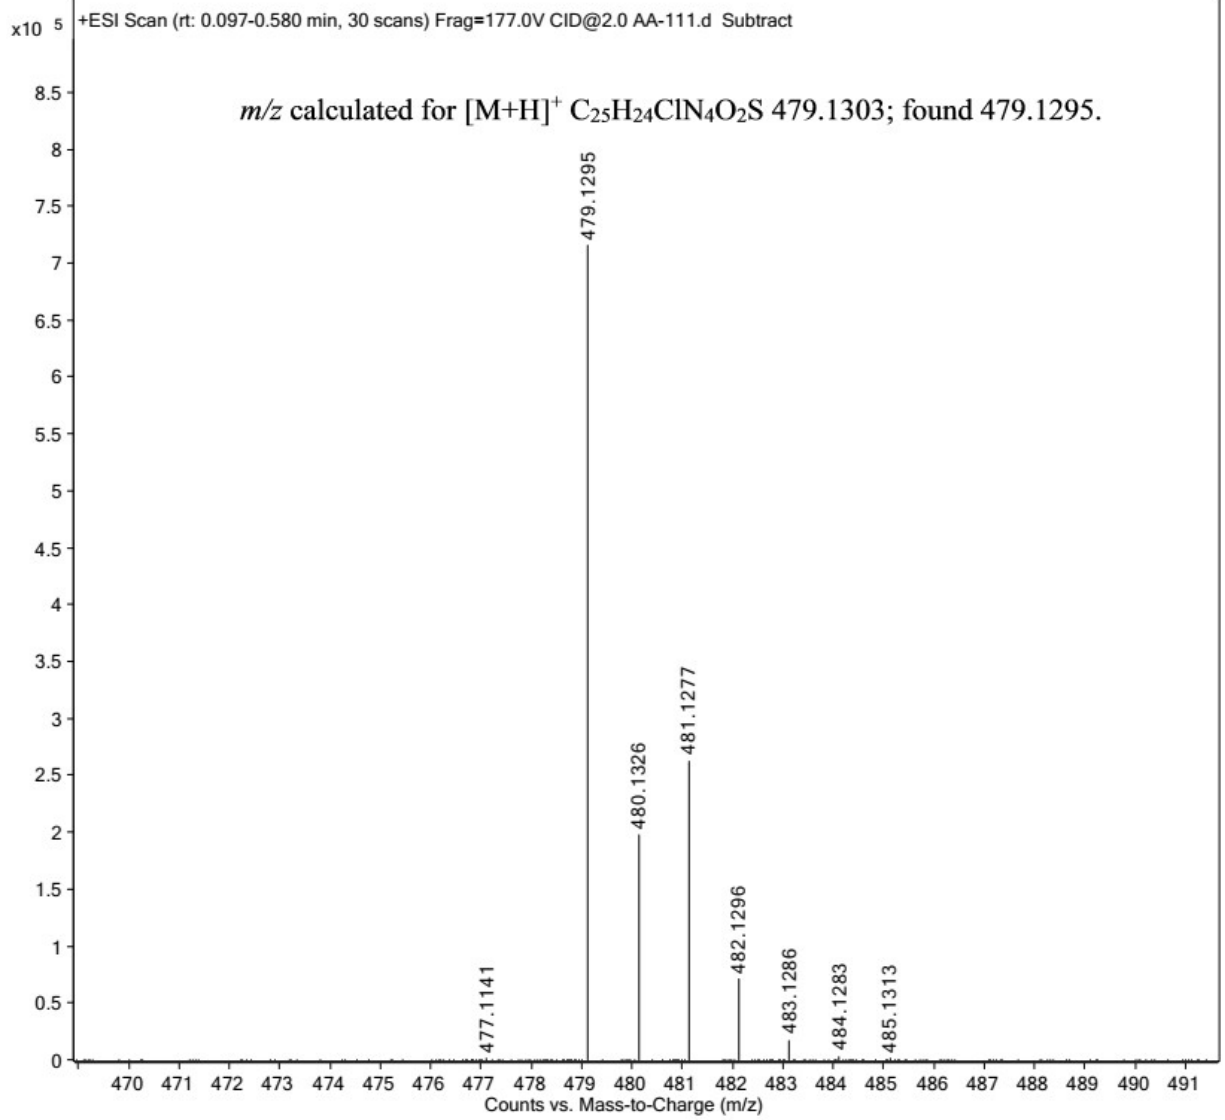

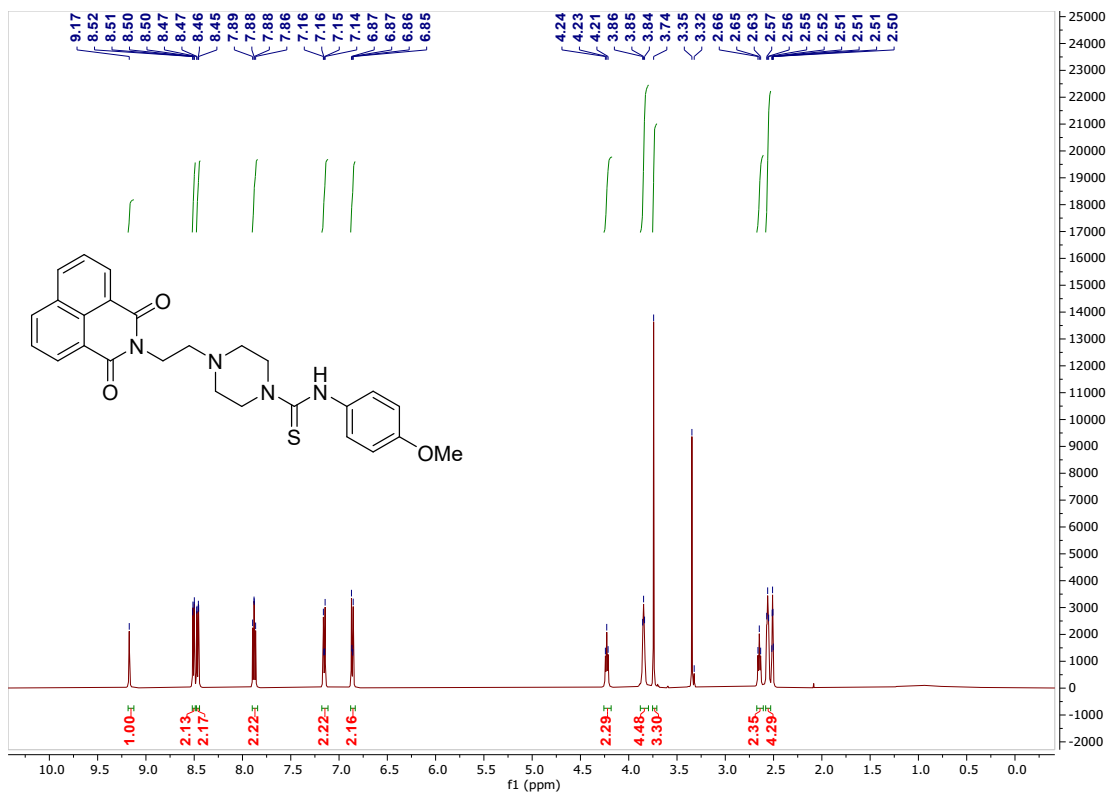

**<sup>1</sup>H NMR spectrum for compound 4e (500 MHz: DMSO-*d*<sub>6</sub>)**

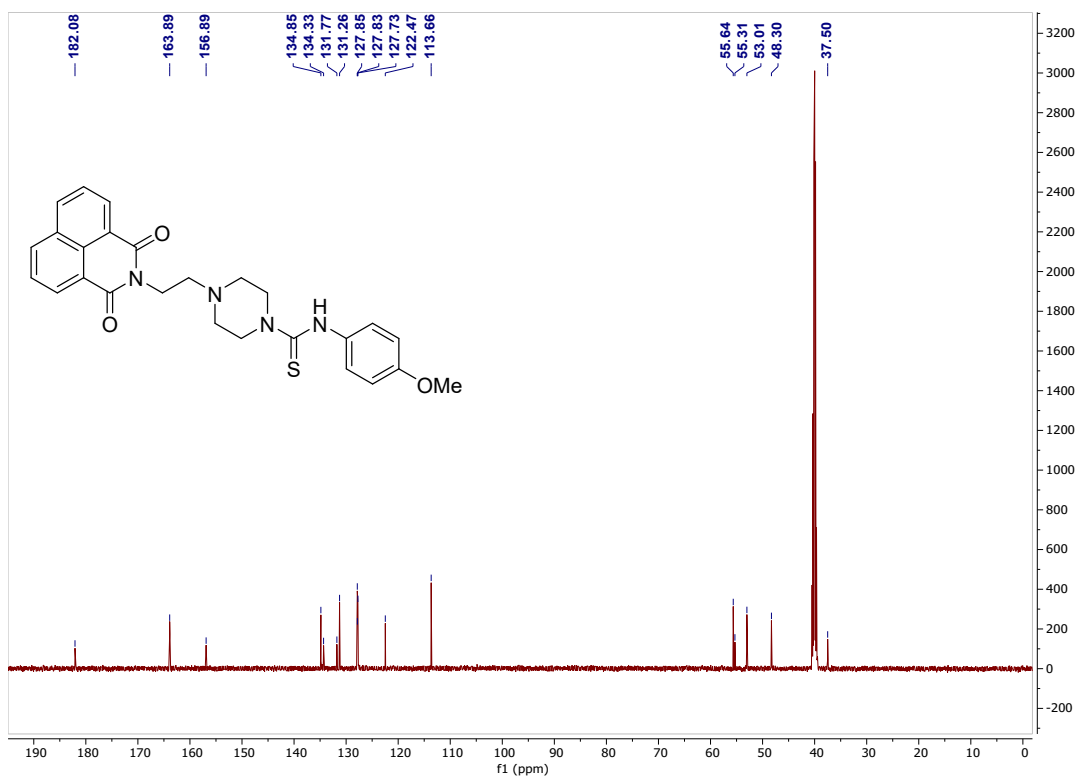

**<sup>13</sup>C NMR spectrum for compound 4e (125 MHz: DMSO-*d*<sub>6</sub>)**

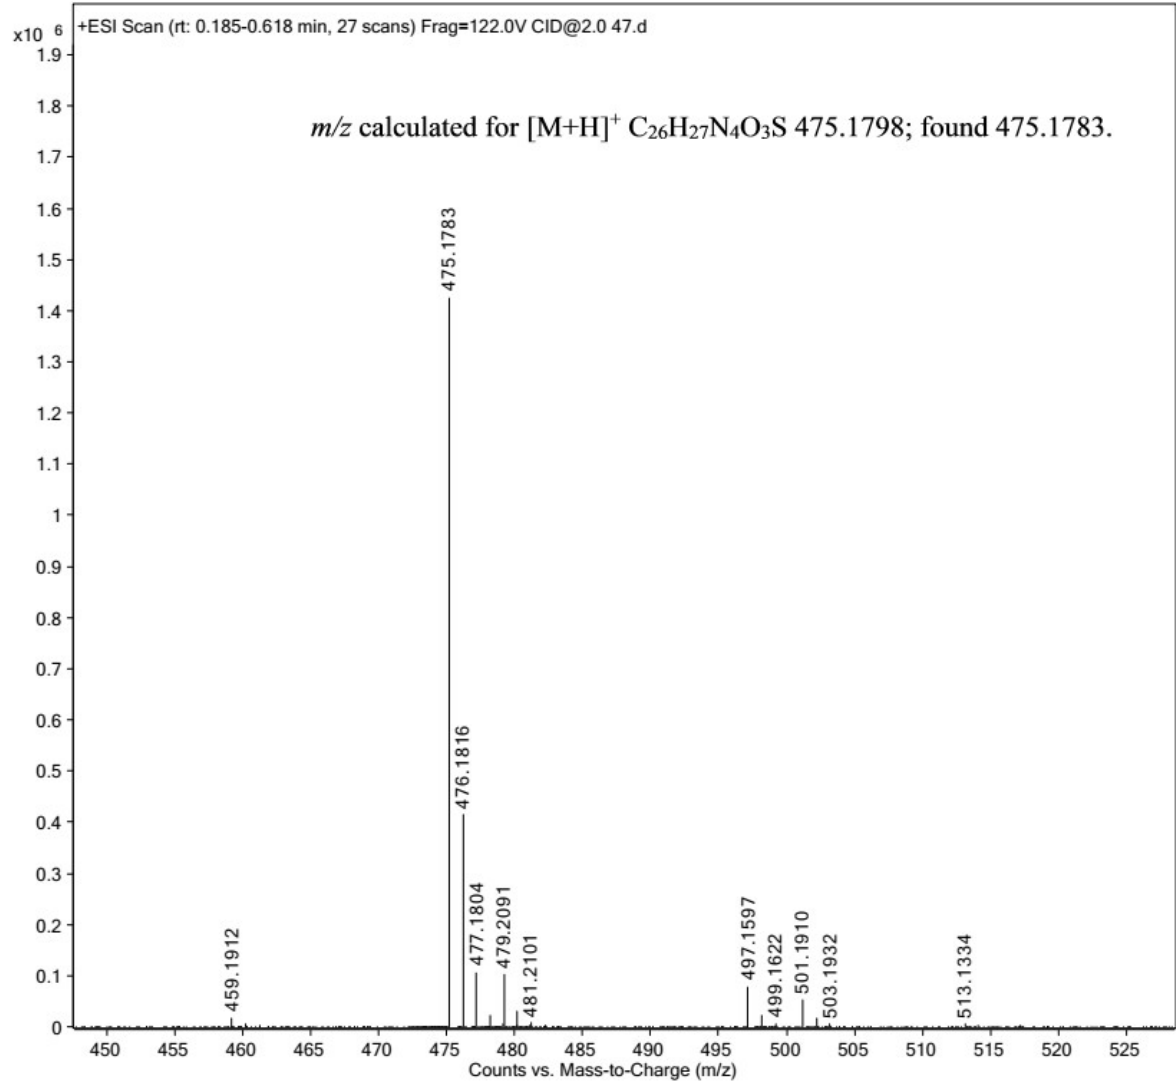

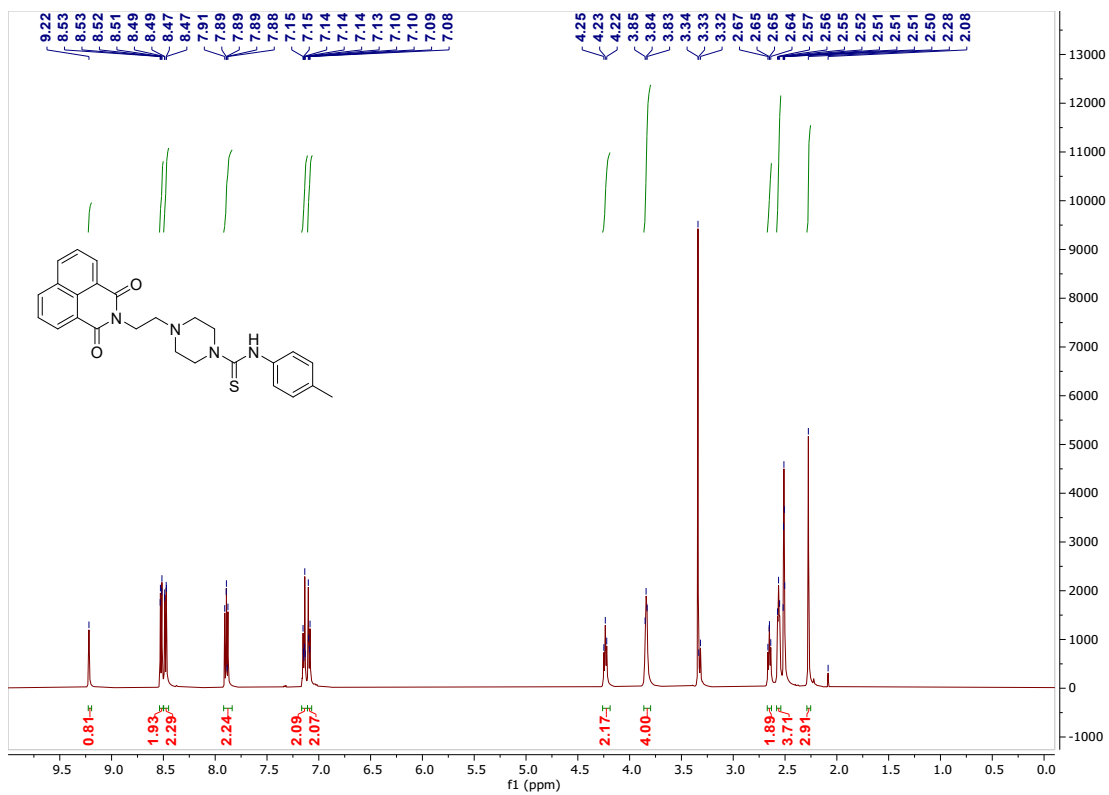

**<sup>1</sup>H spectrum for compound 4f (500 MHz: DMSO-*d*<sub>6</sub>)**

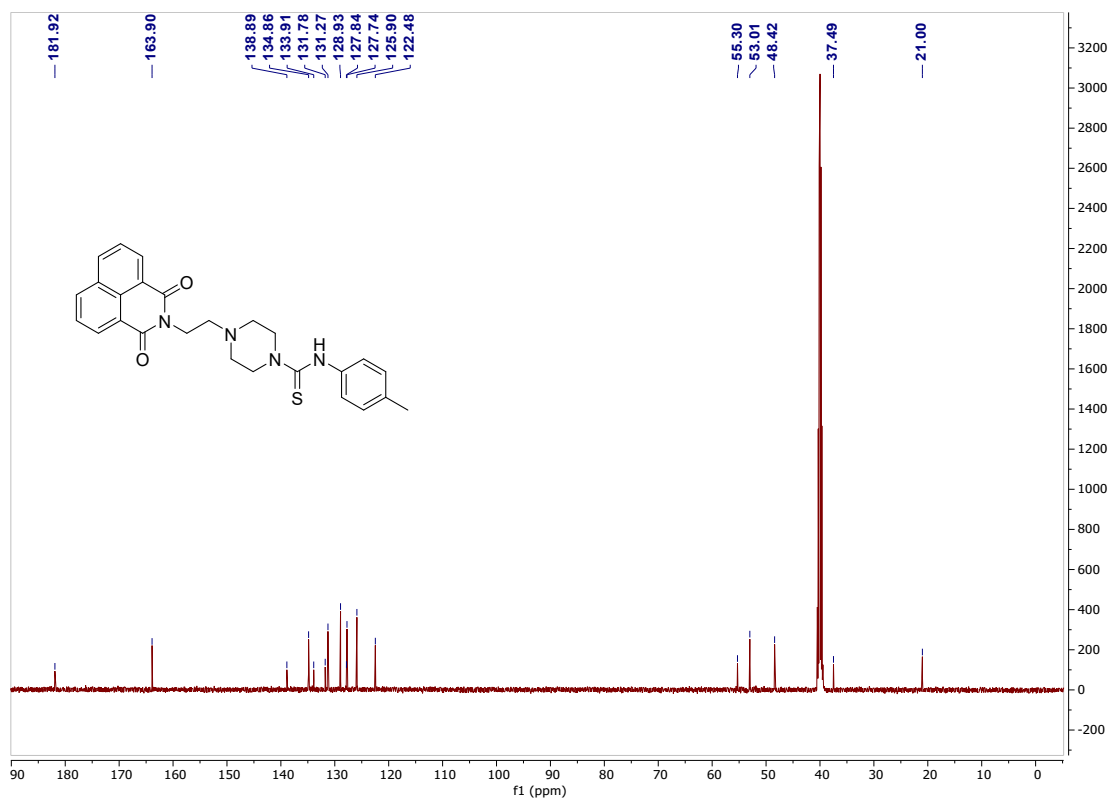

**<sup>13</sup>C spectrum for compound 4f (125 MHz: DMSO-*d*<sub>6</sub>)**

+ESI Scan (rt: 0.239-0.888 min, 40 scans) Frag=122.0V CID@2.0 46.d

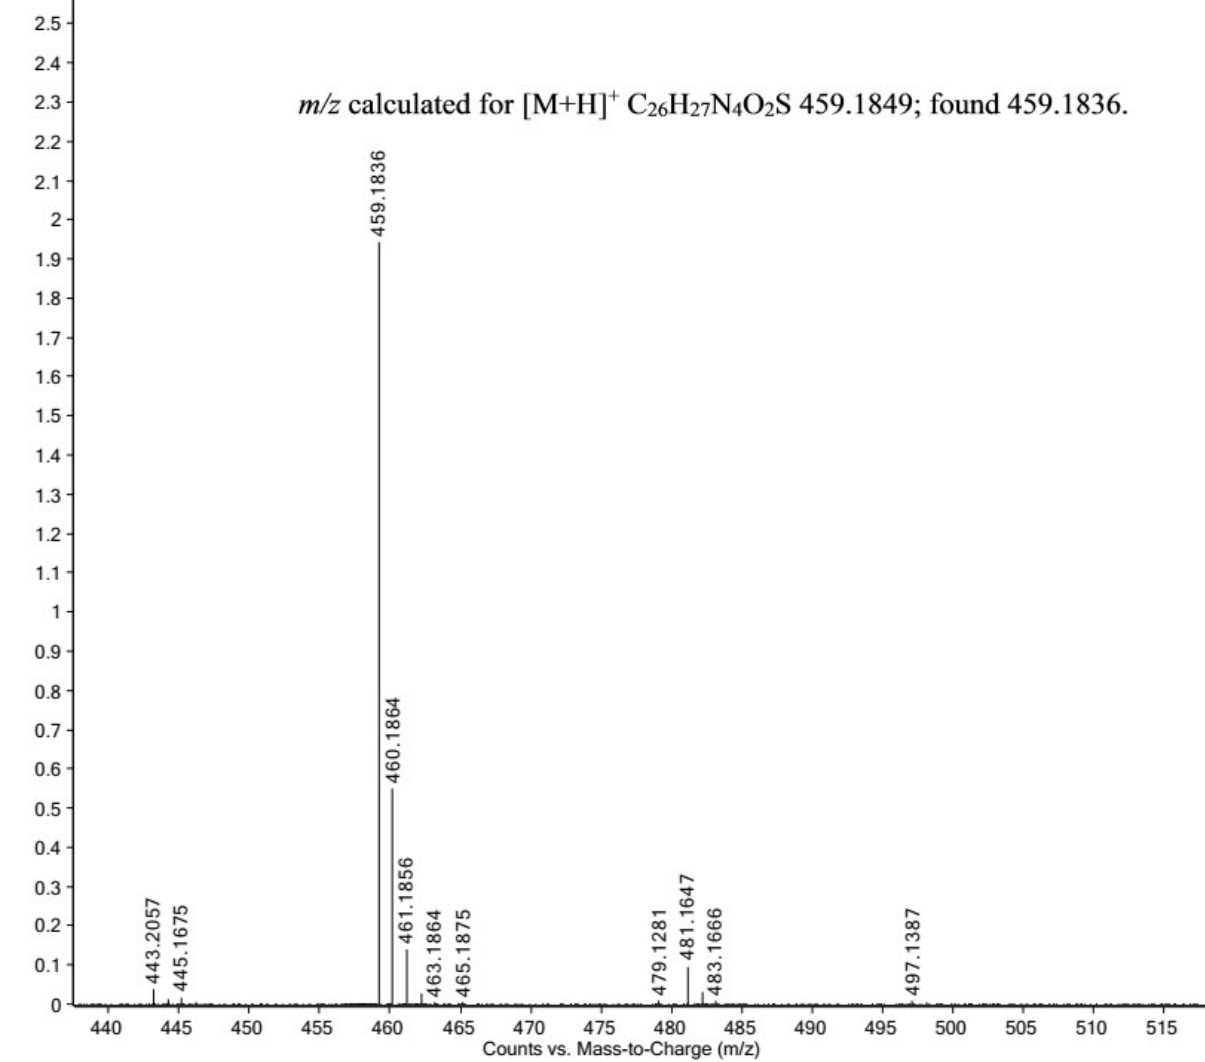



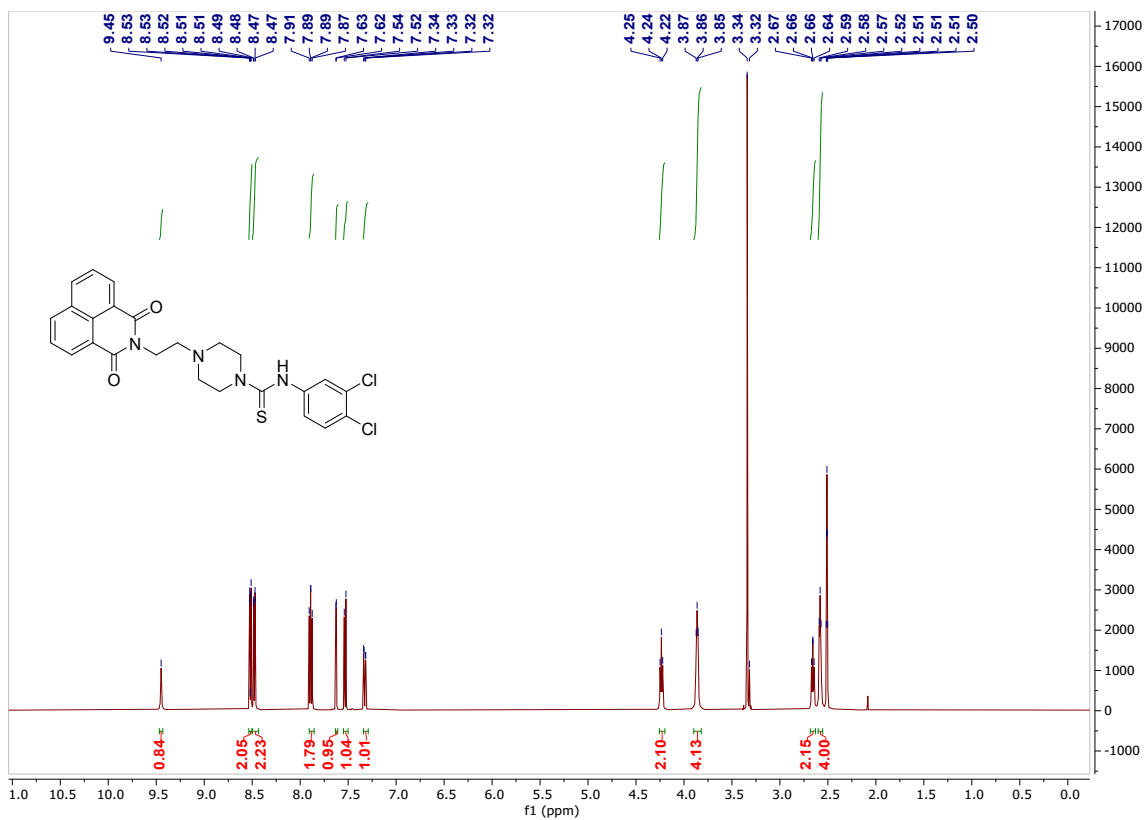

**<sup>1</sup>H spectrum for compound 4g (500 MHz: DMSO-d<sub>6</sub>)**

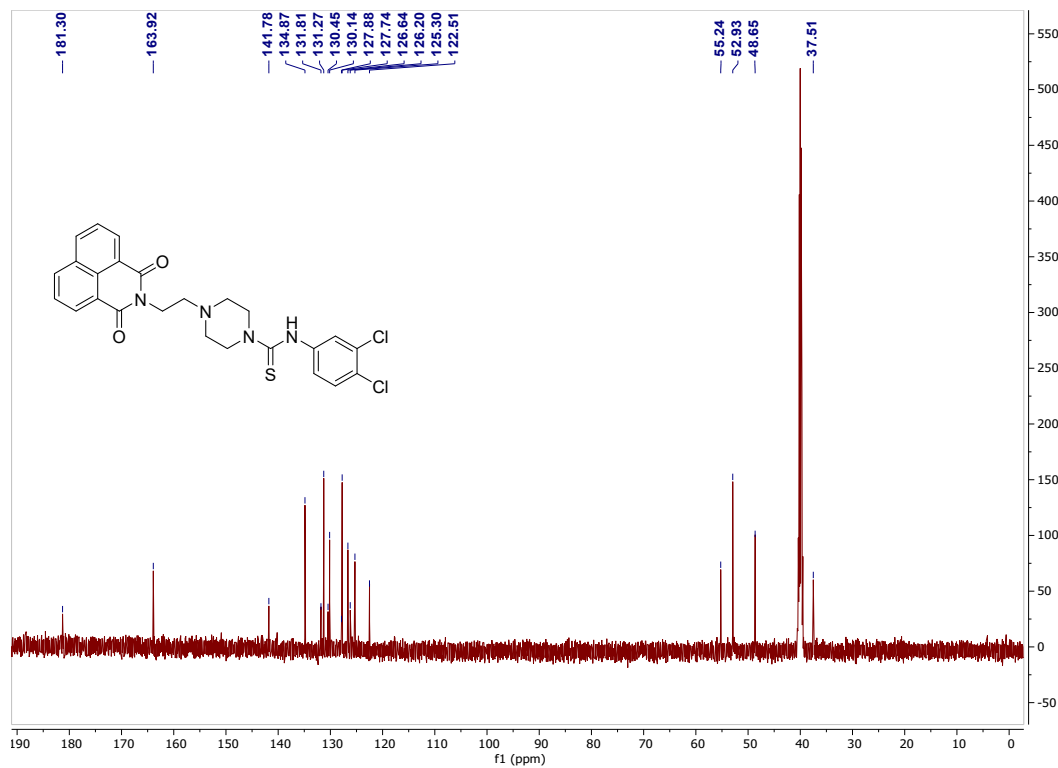

**<sup>13</sup>C spectrum for compound 4g (125 MHz: DMSO-d<sub>6</sub>)**

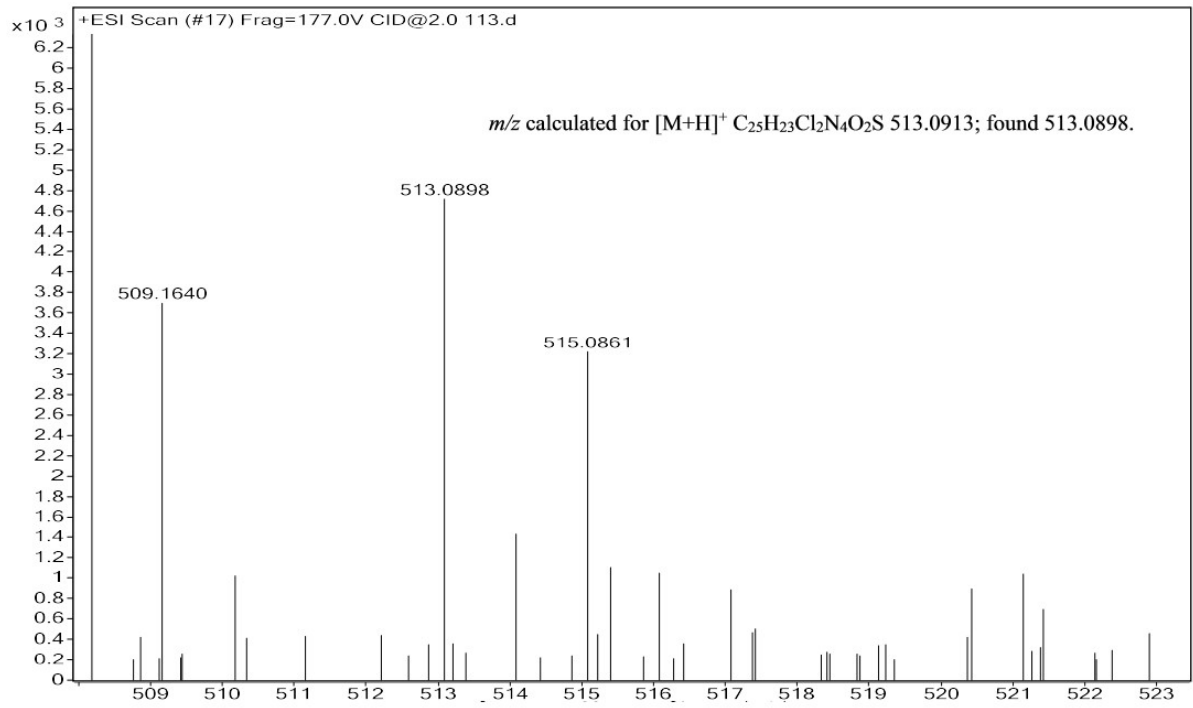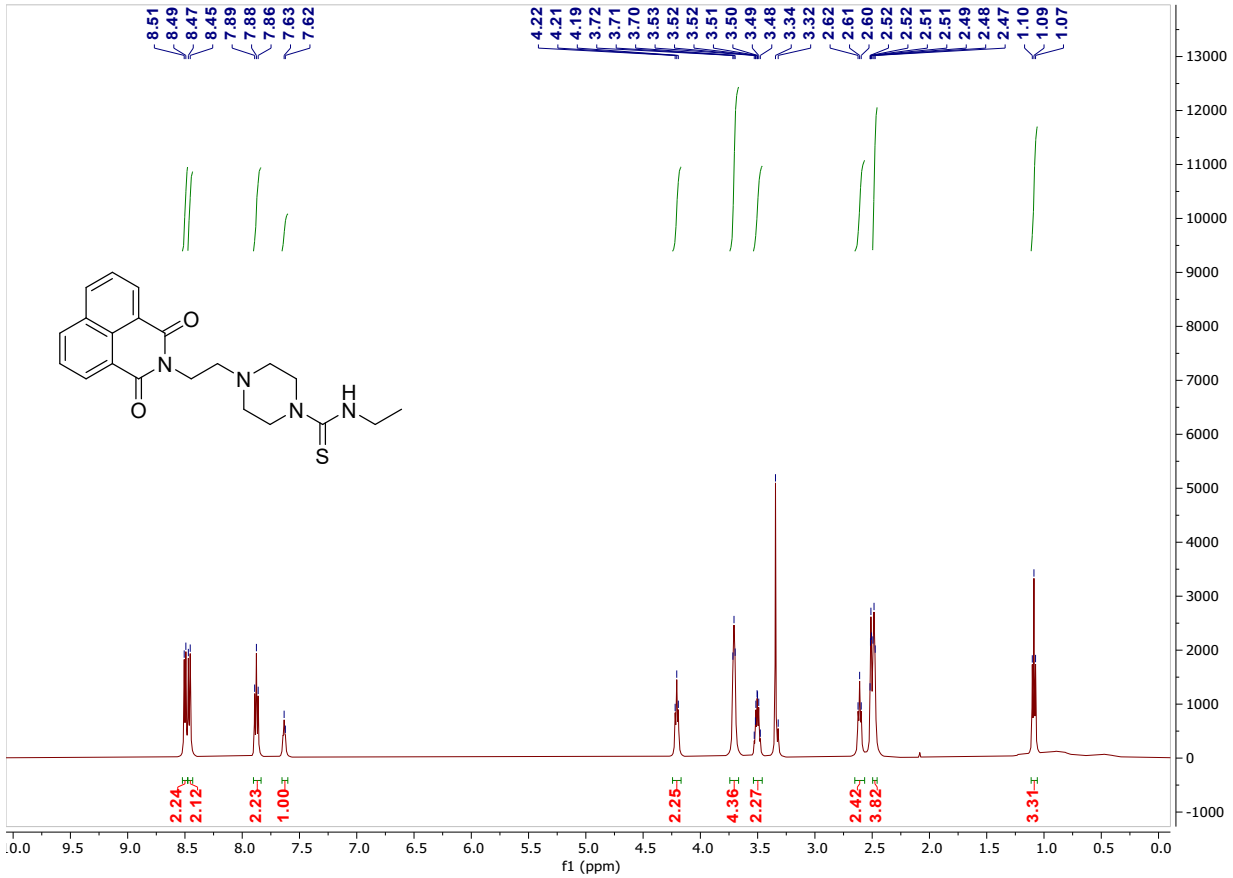

<sup>1</sup>H spectrum for compound 4h (500 MHz: DMSO-d<sub>6</sub>)

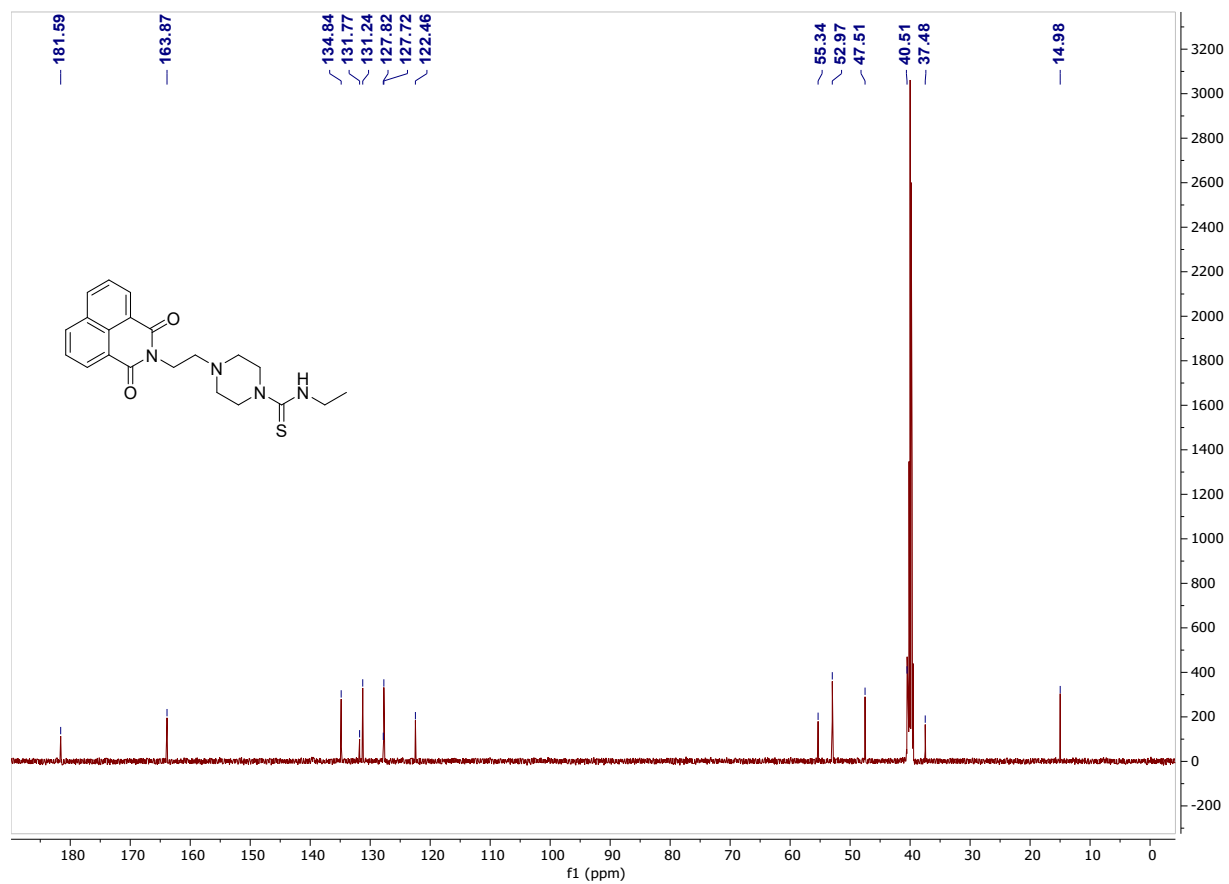

$^{13}\text{C}$  spectrum for compound **4h** (125 MHz:  $\text{DMSO}-d_6$ )

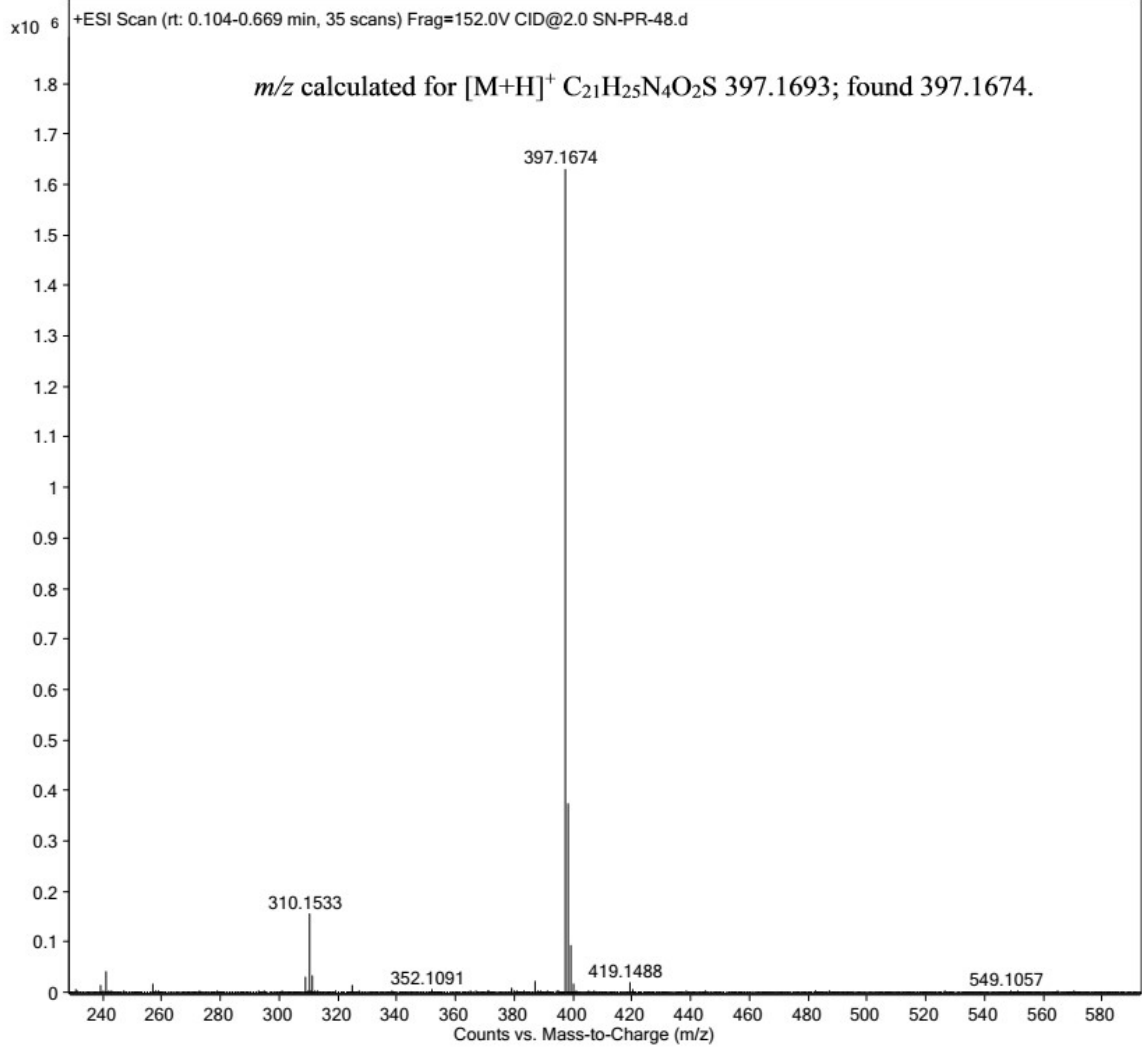

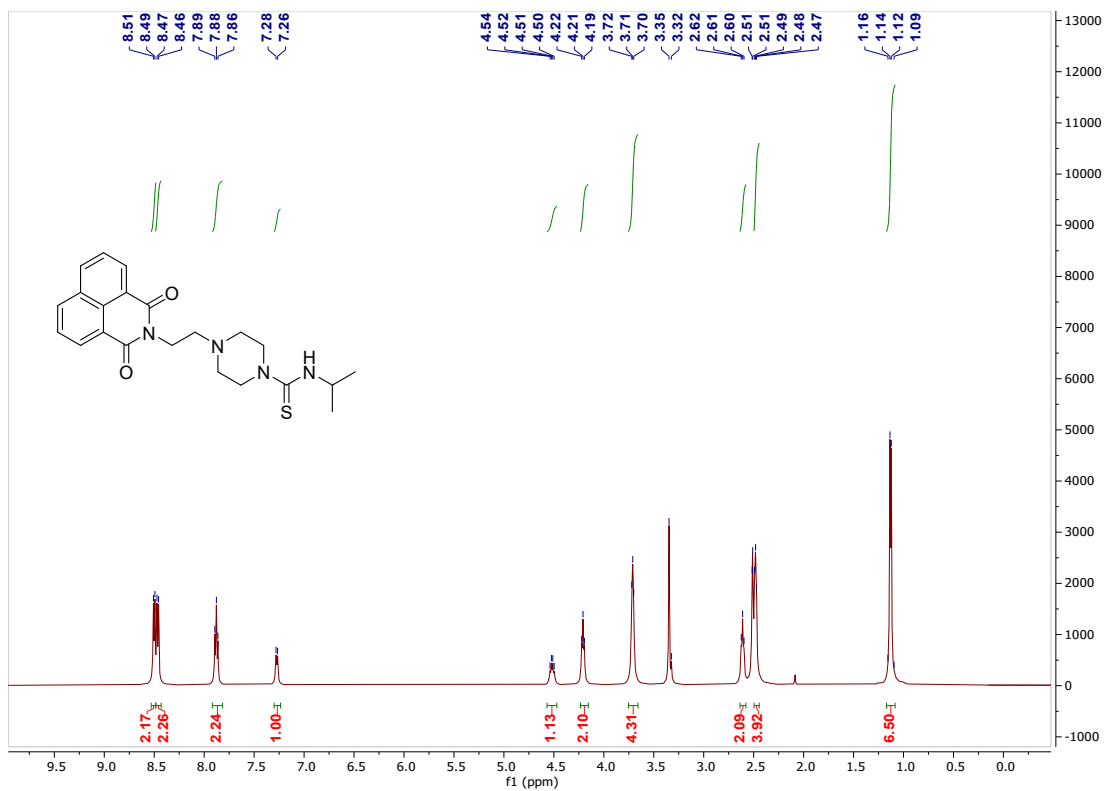

<sup>1</sup>H spectrum for compound **4i** (500 MHz: DMSO-*d*<sub>6</sub>)

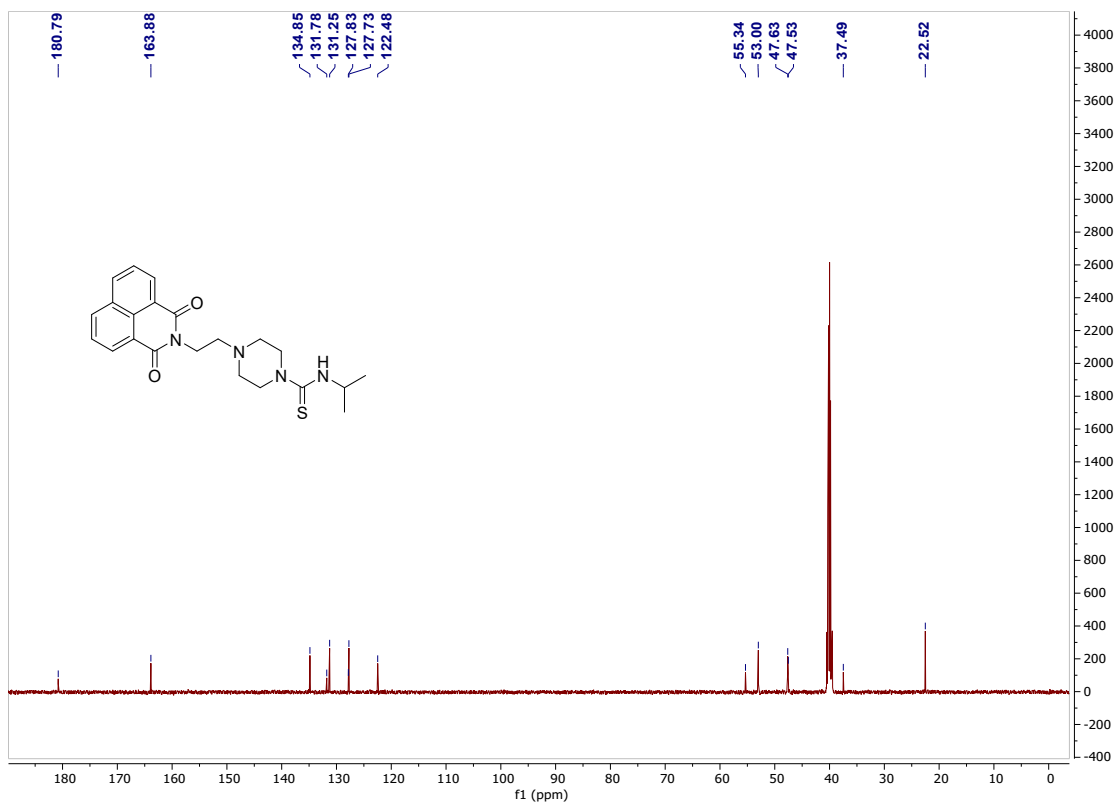

<sup>13</sup>C spectrum for compound **4i** (125 MHz: DMSO-*d*<sub>6</sub>)

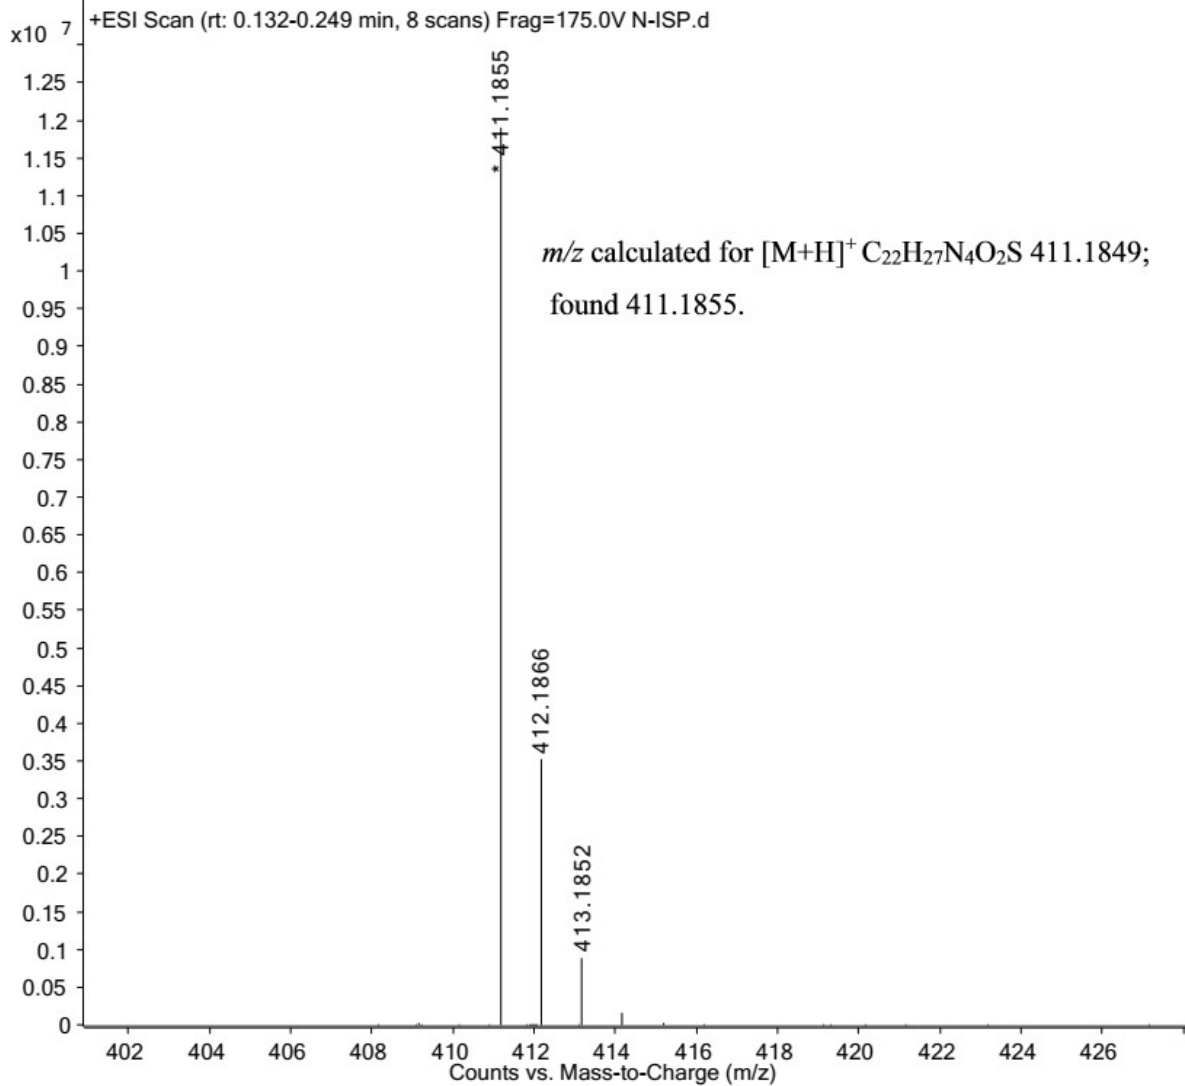

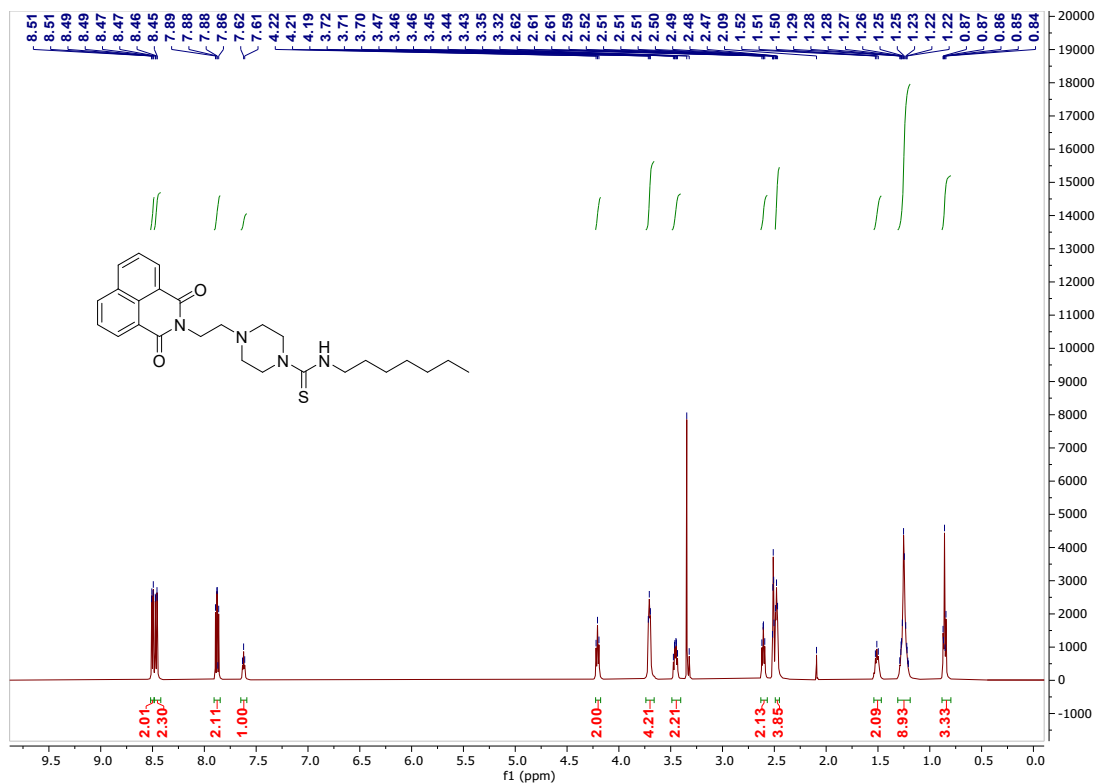

**<sup>1</sup>H spectrum for compound 4j (500 MHz: DMSO-*d*<sub>6</sub>)**

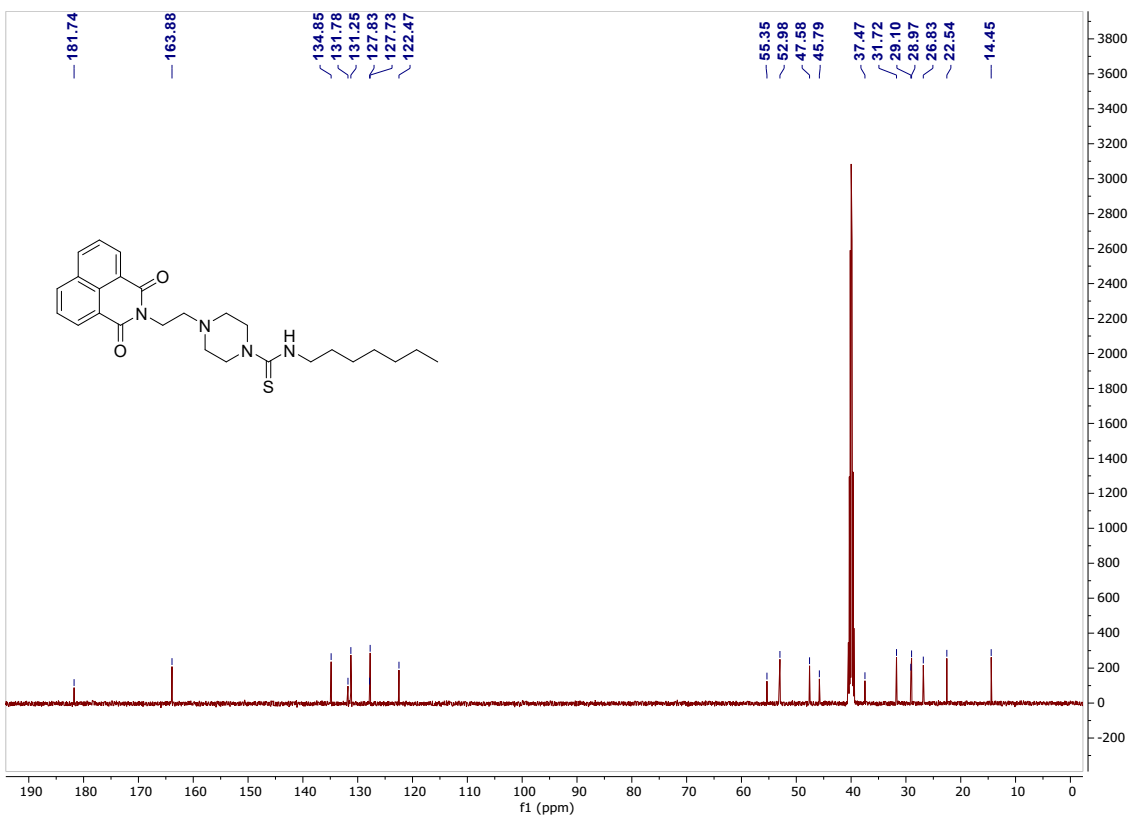

**<sup>13</sup>C spectrum for compound 4j (125 MHz: DMSO-*d*<sub>6</sub>)**

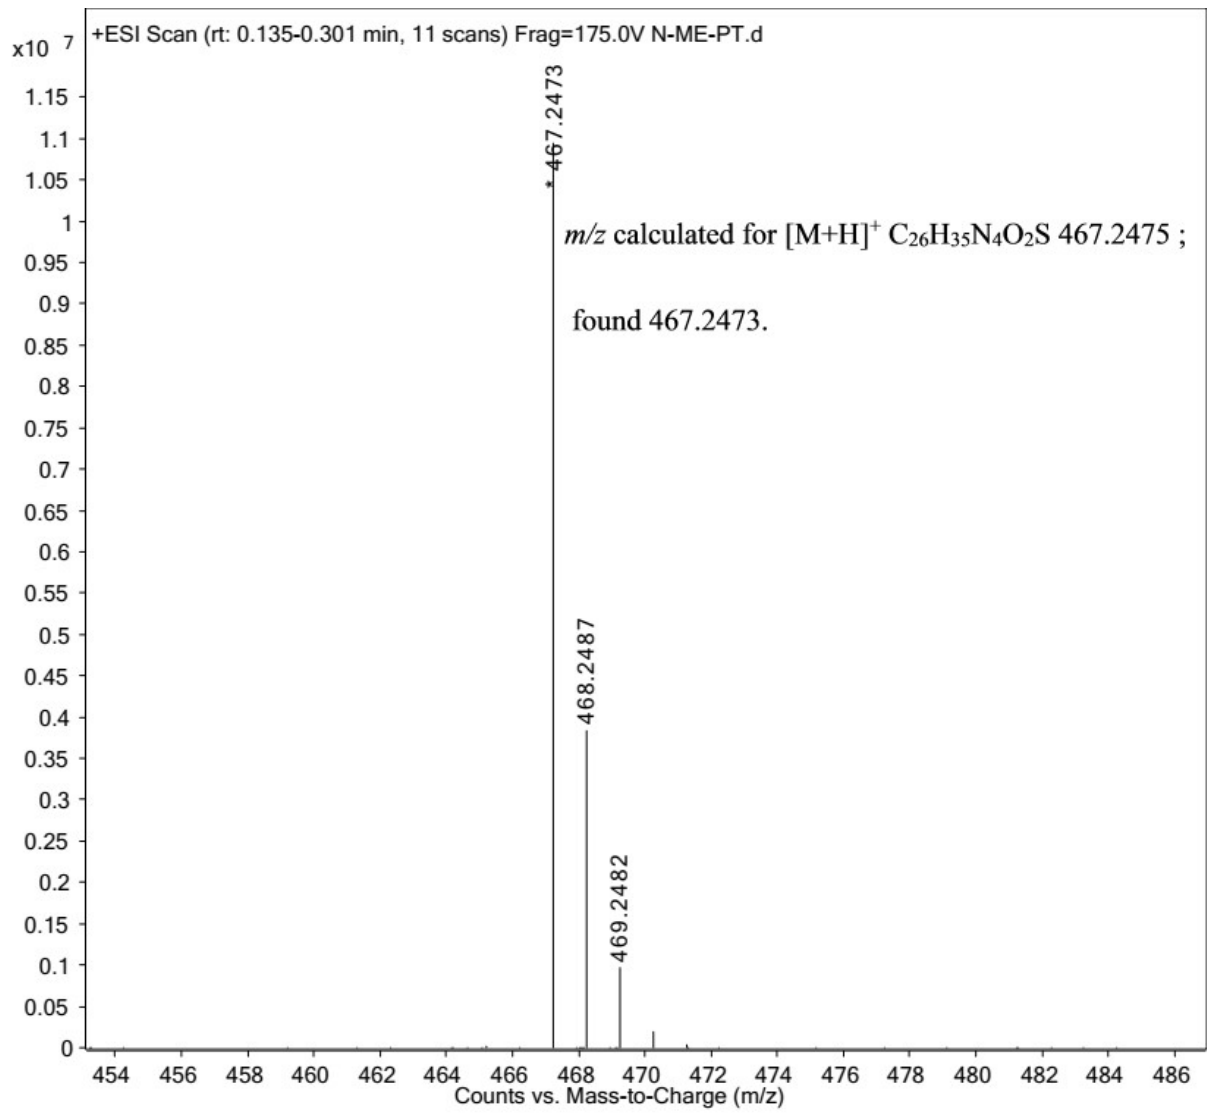



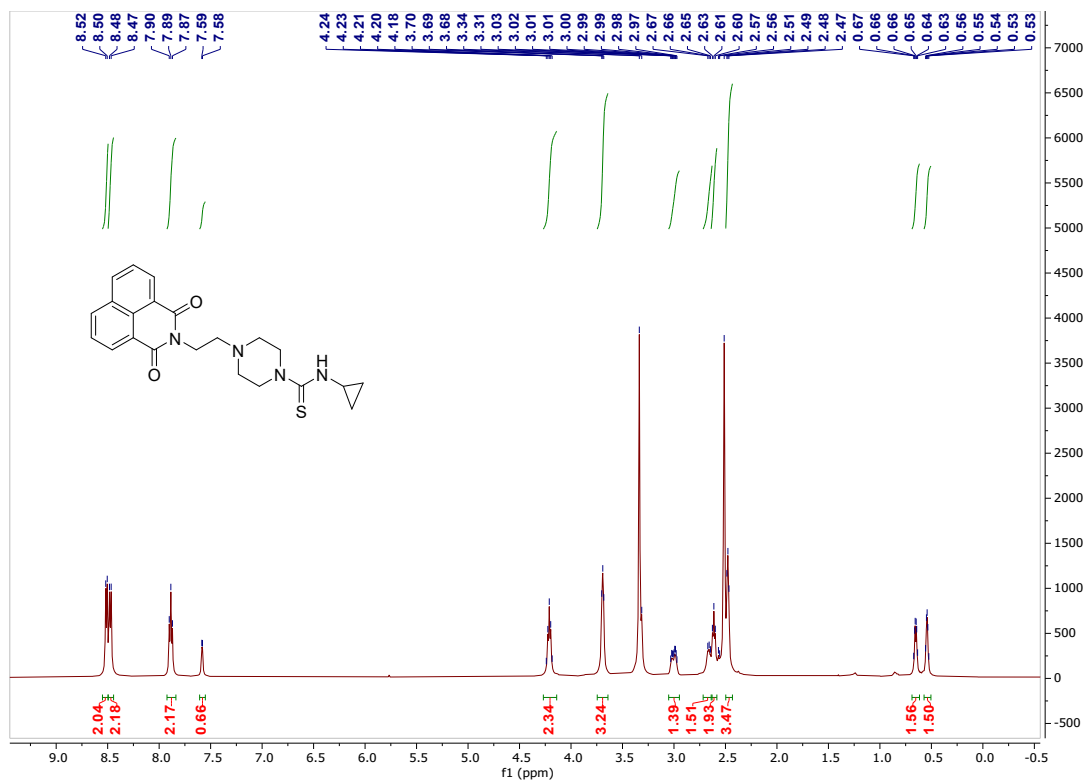

<sup>1</sup>H spectrum for compound 4k (500 MHz: DMSO-d<sub>6</sub>)

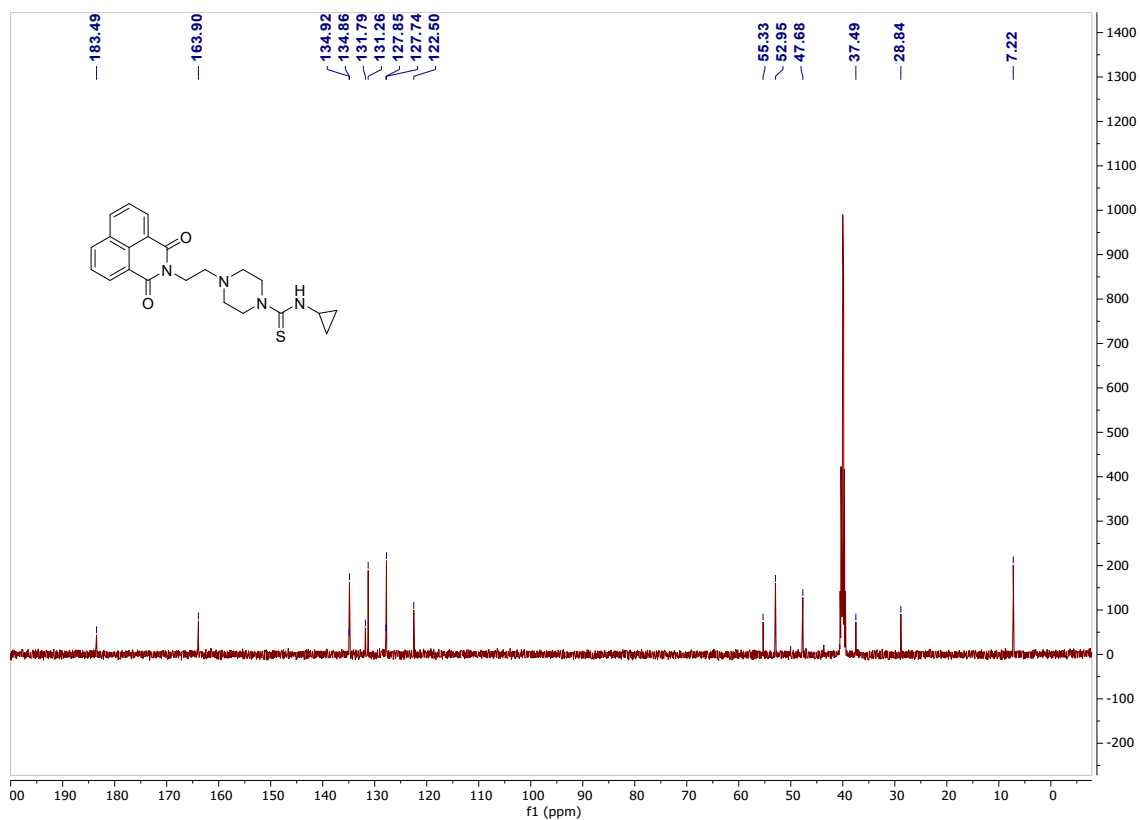

<sup>13</sup>C spectrum for compound 4k (125 MHz: DMSO-d<sub>6</sub>)

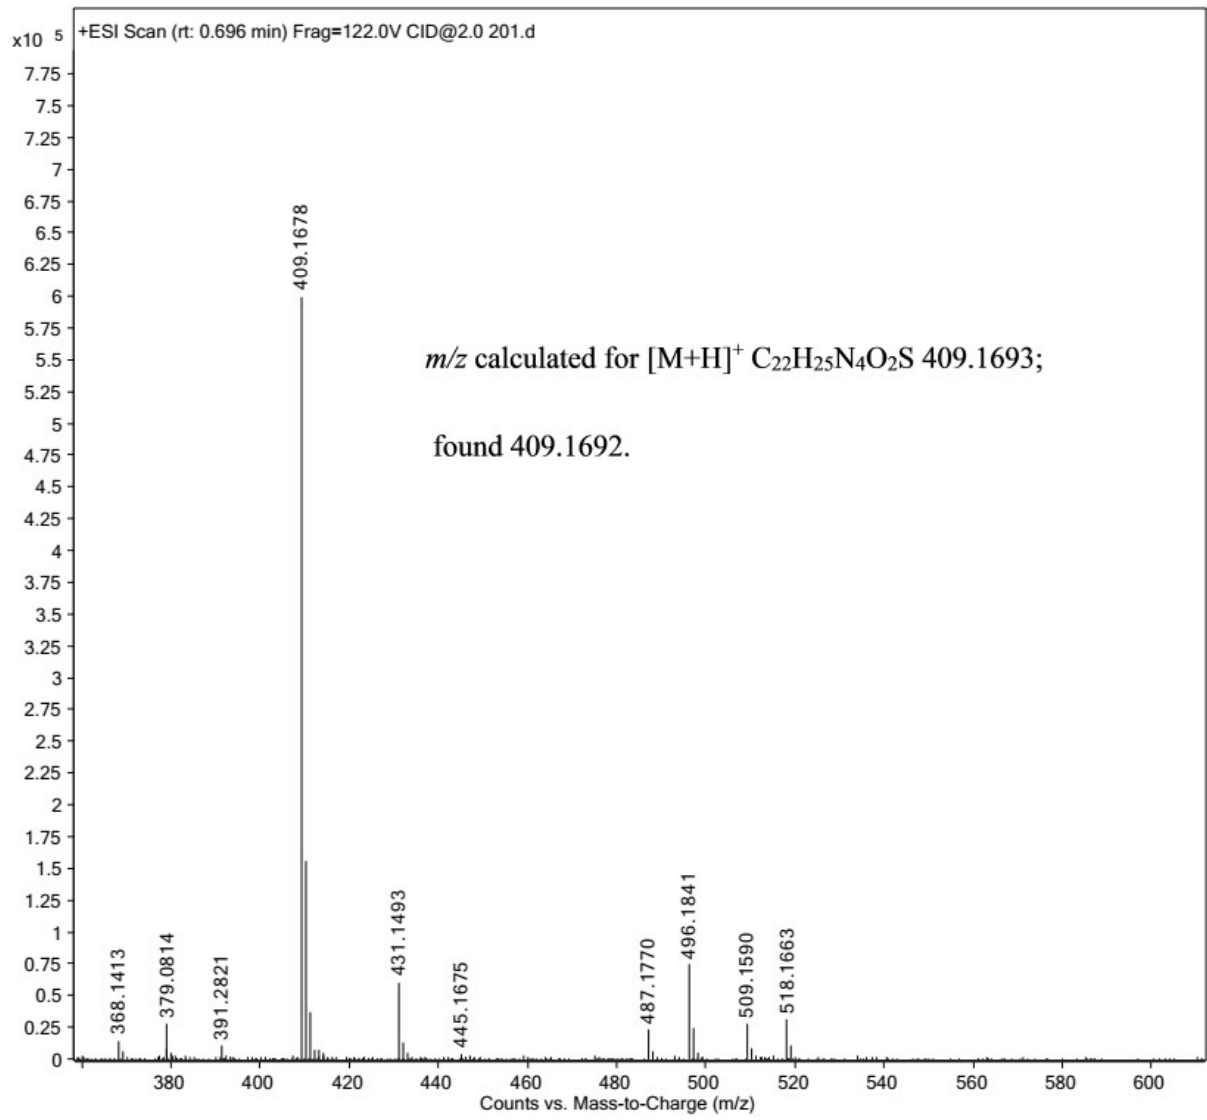

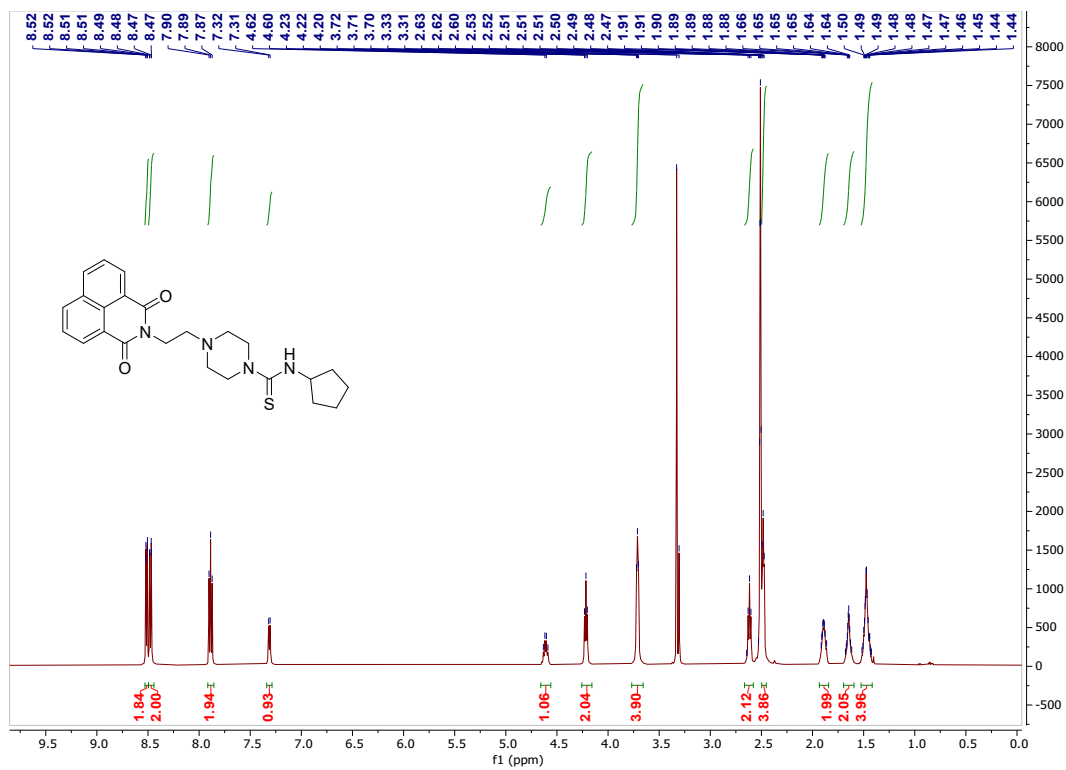

<sup>1</sup>H spectrum for compound 4I (500 MHz: DMSO-*d*<sub>6</sub>)

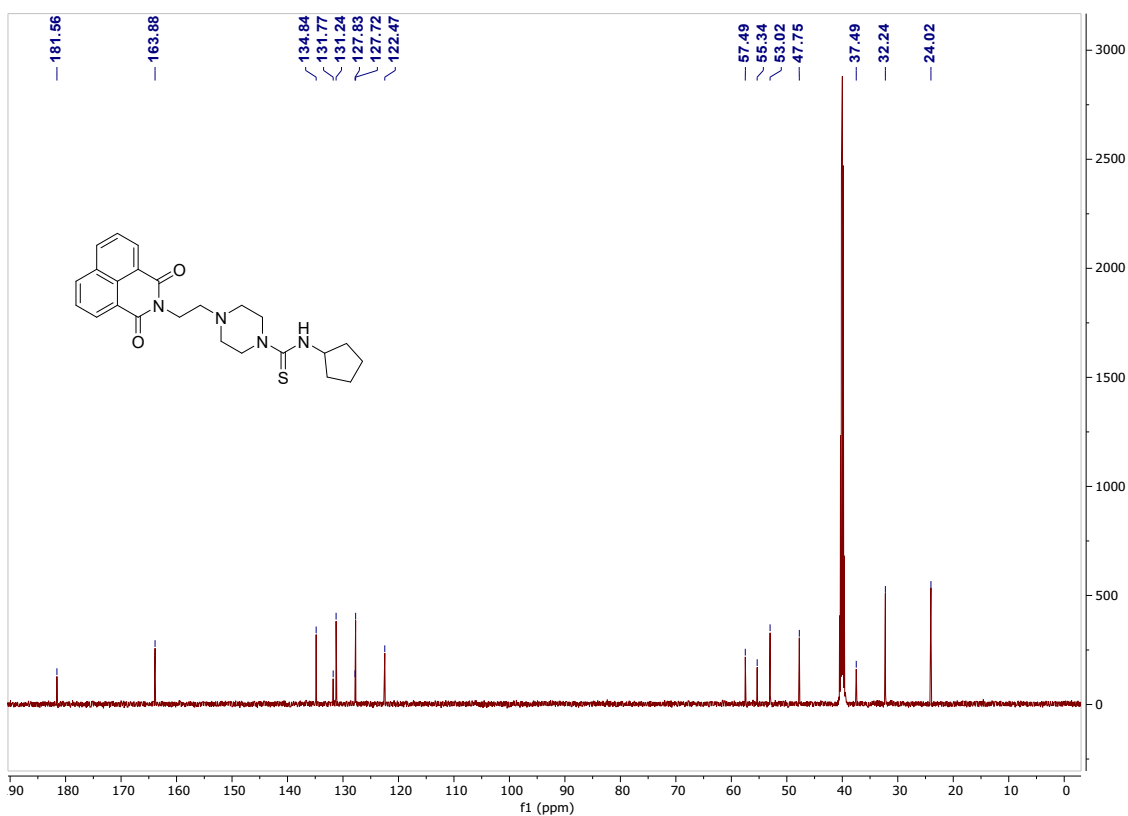

<sup>13</sup>C spectrum for compound 4I (125 MHz: DMSO-*d*<sub>6</sub>)

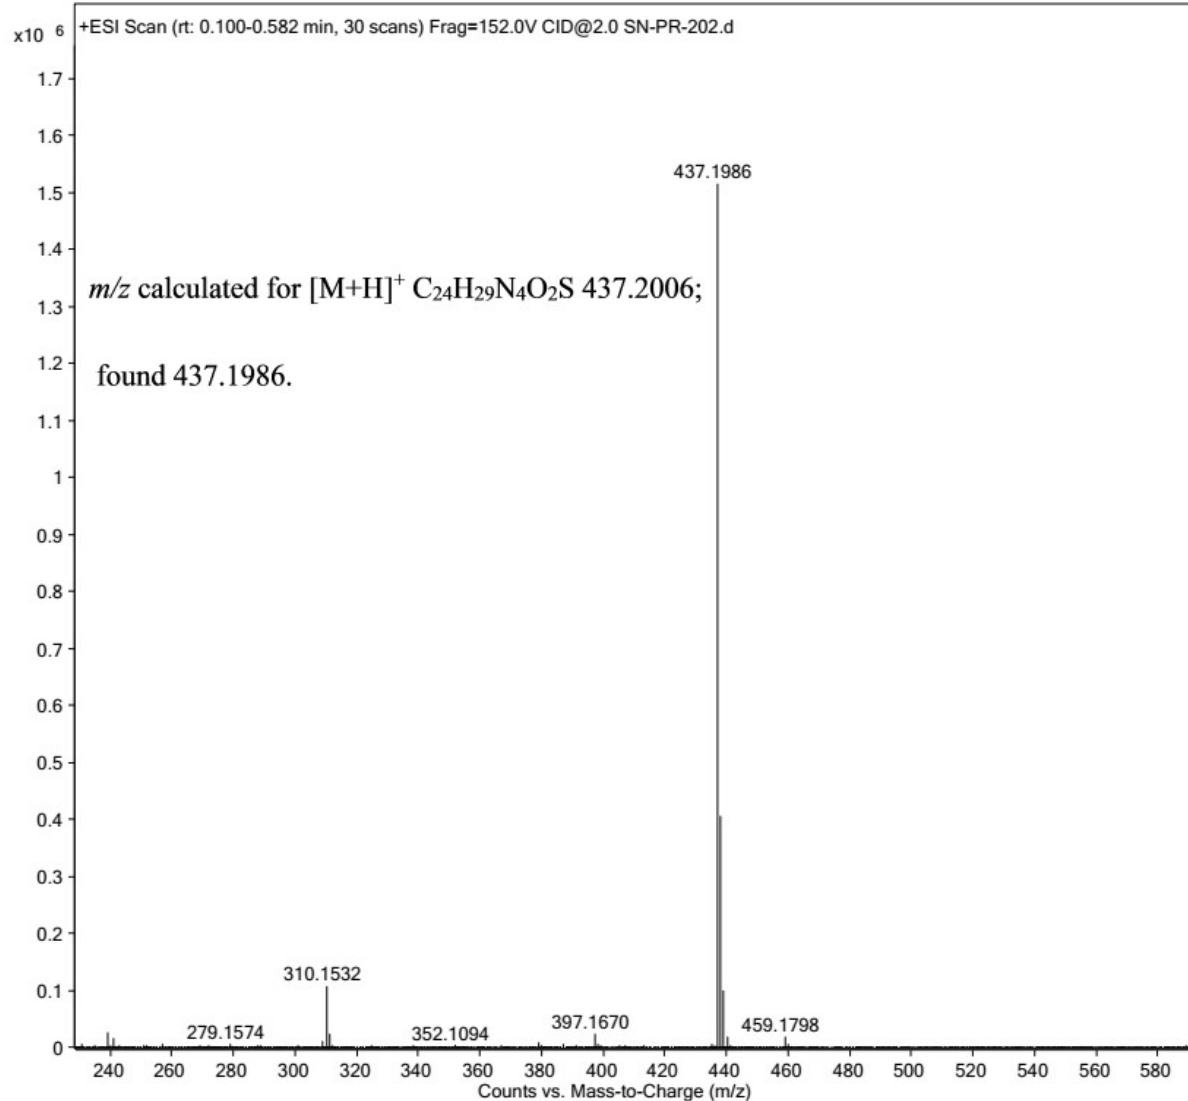

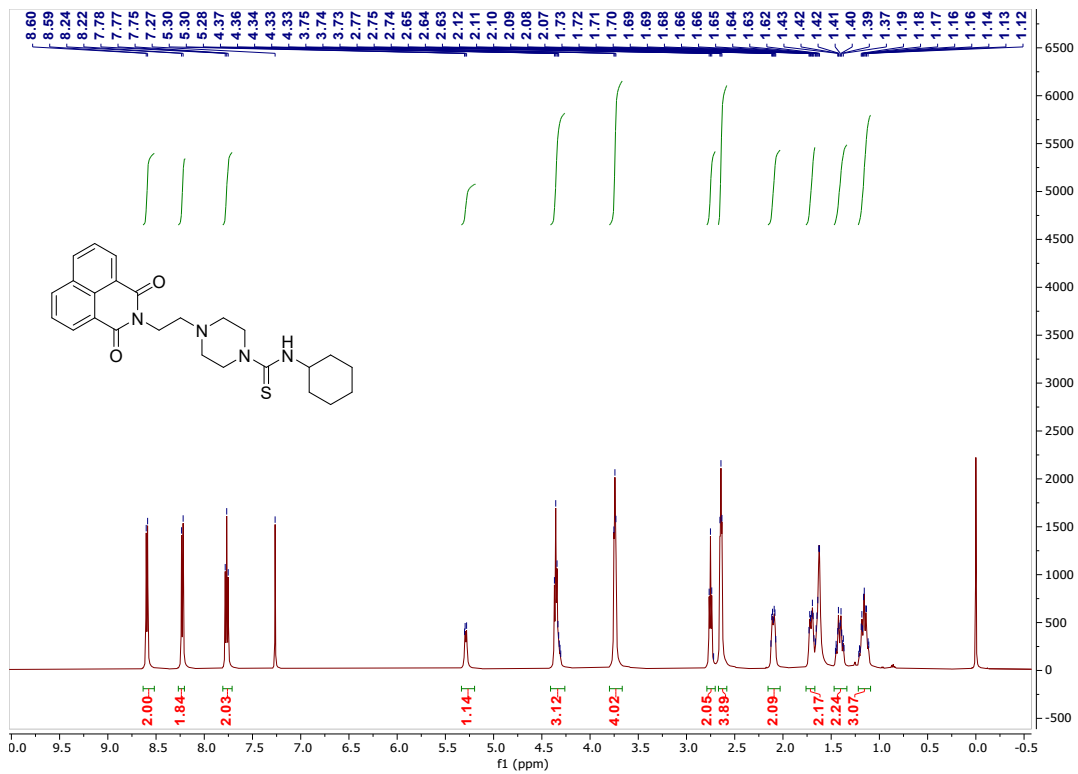

<sup>1</sup>H spectrum for compound **4m** (500 MHz: CDCl<sub>3</sub>)

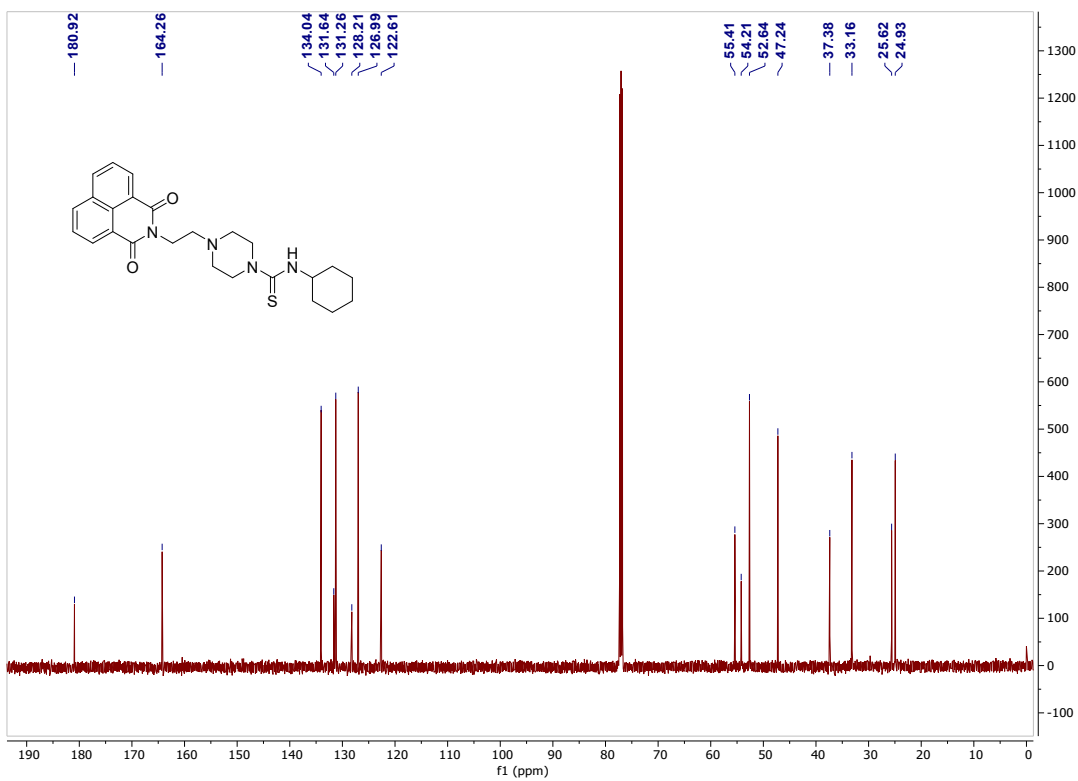

<sup>13</sup>C spectrum for compound **4m** (125 MHz: CDCl<sub>3</sub>)

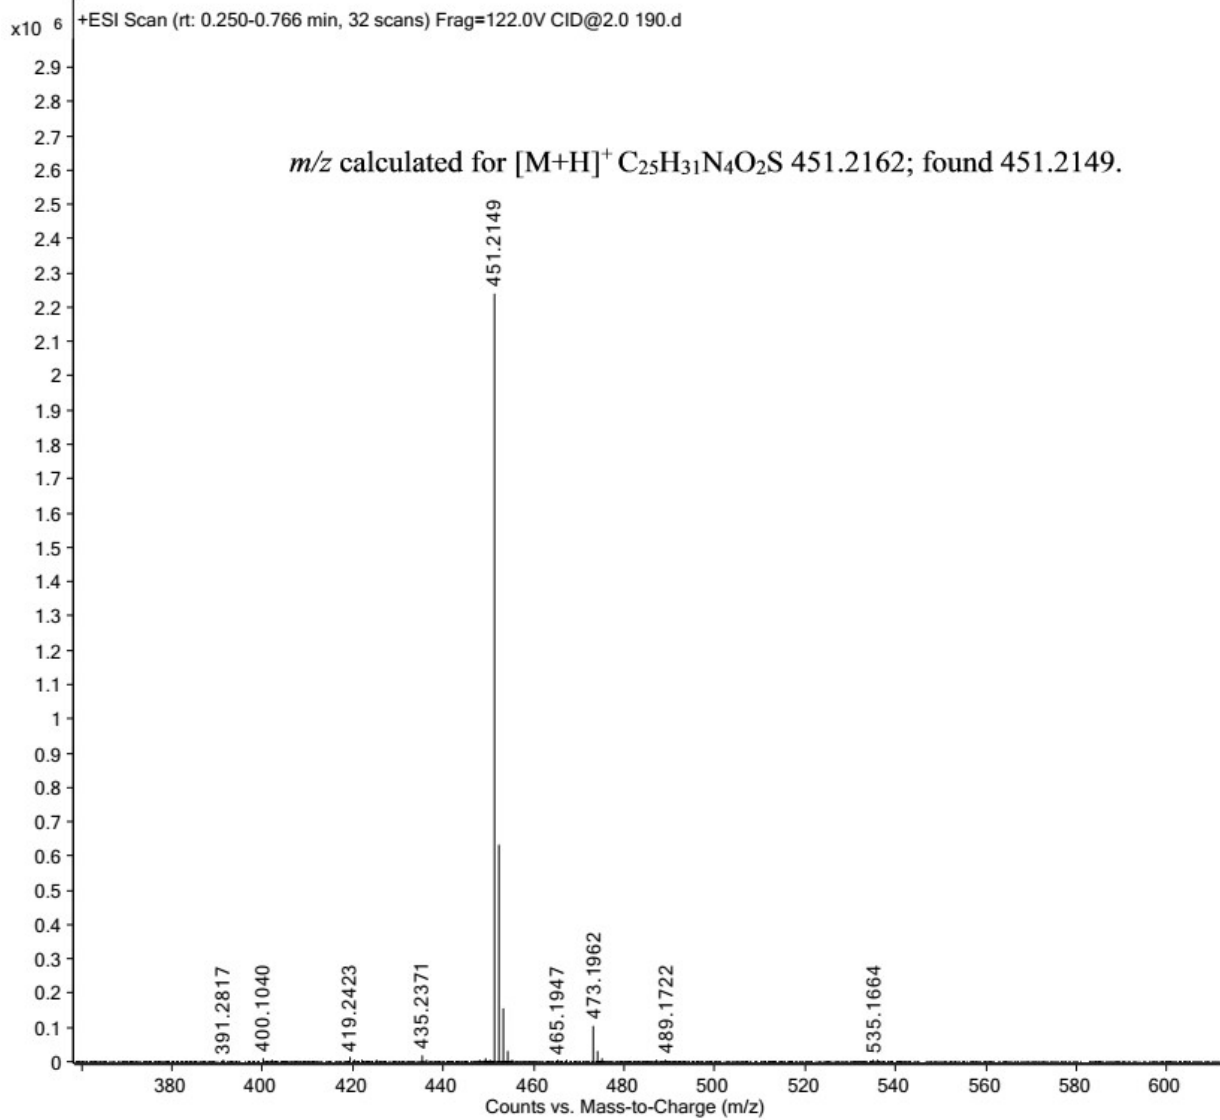

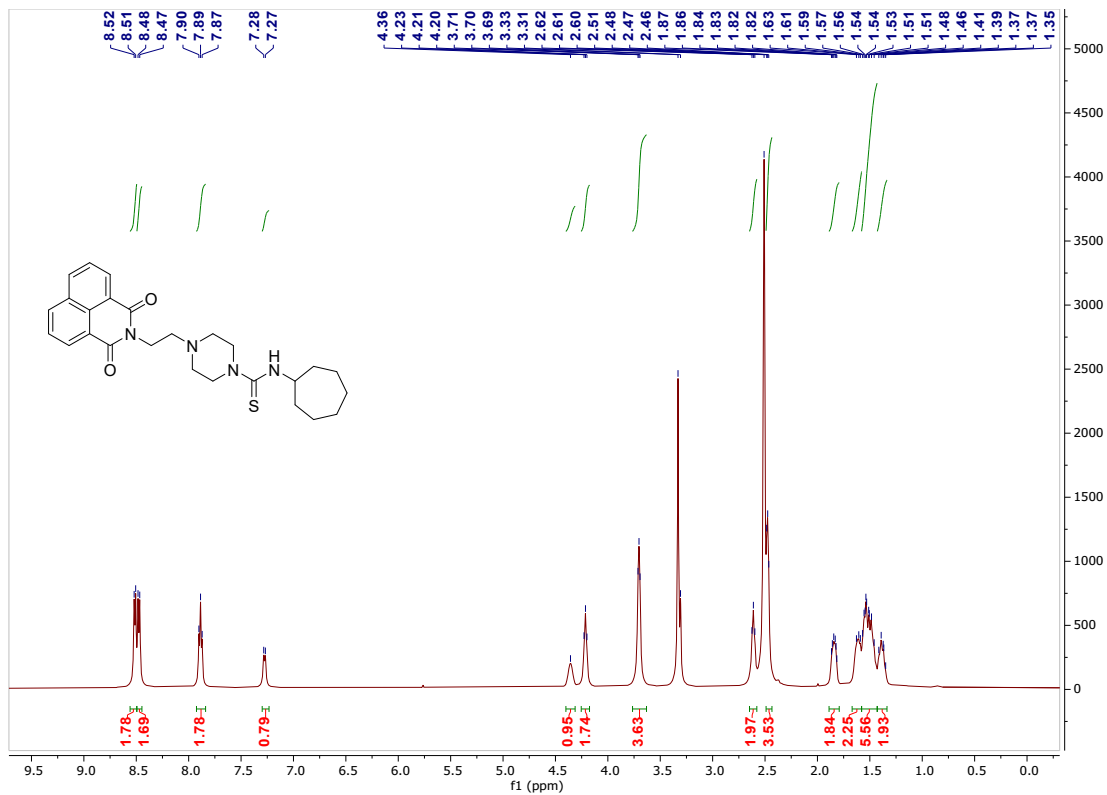

<sup>1</sup>H spectrum for compound **4n** (500 MHz: DMSO-d<sub>6</sub>)

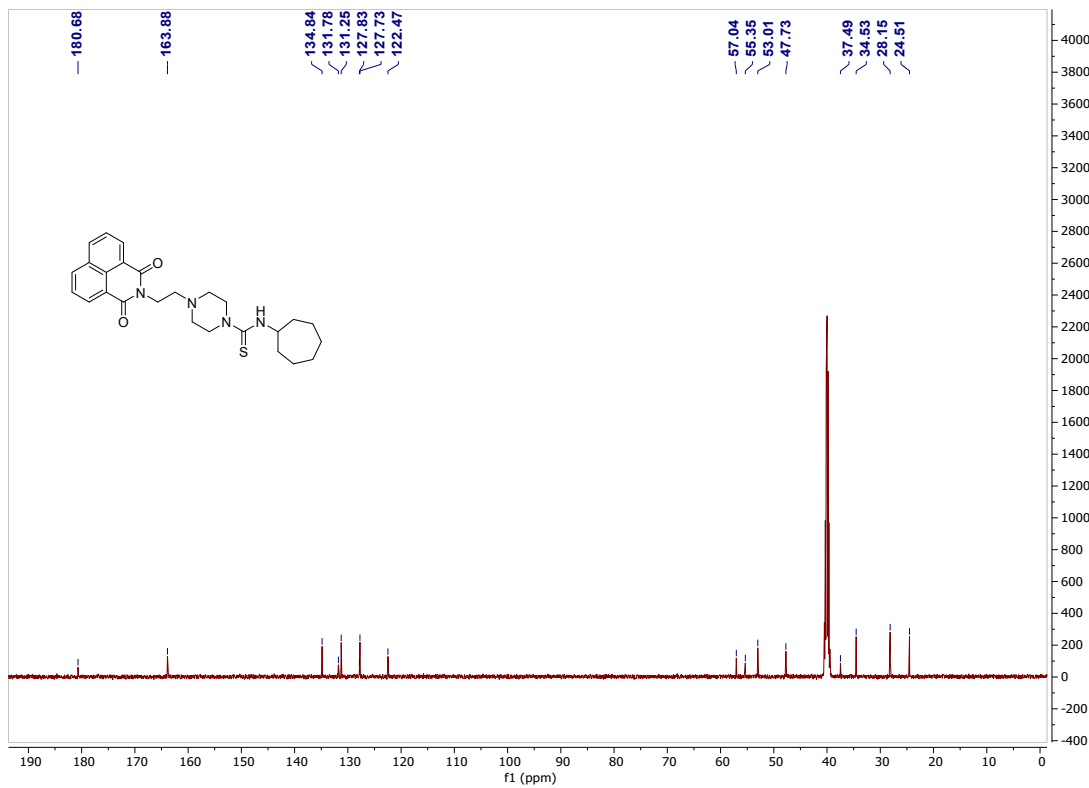

<sup>13</sup>C spectrum for compound **4n** (125 MHz: DMSO-d<sub>6</sub>)

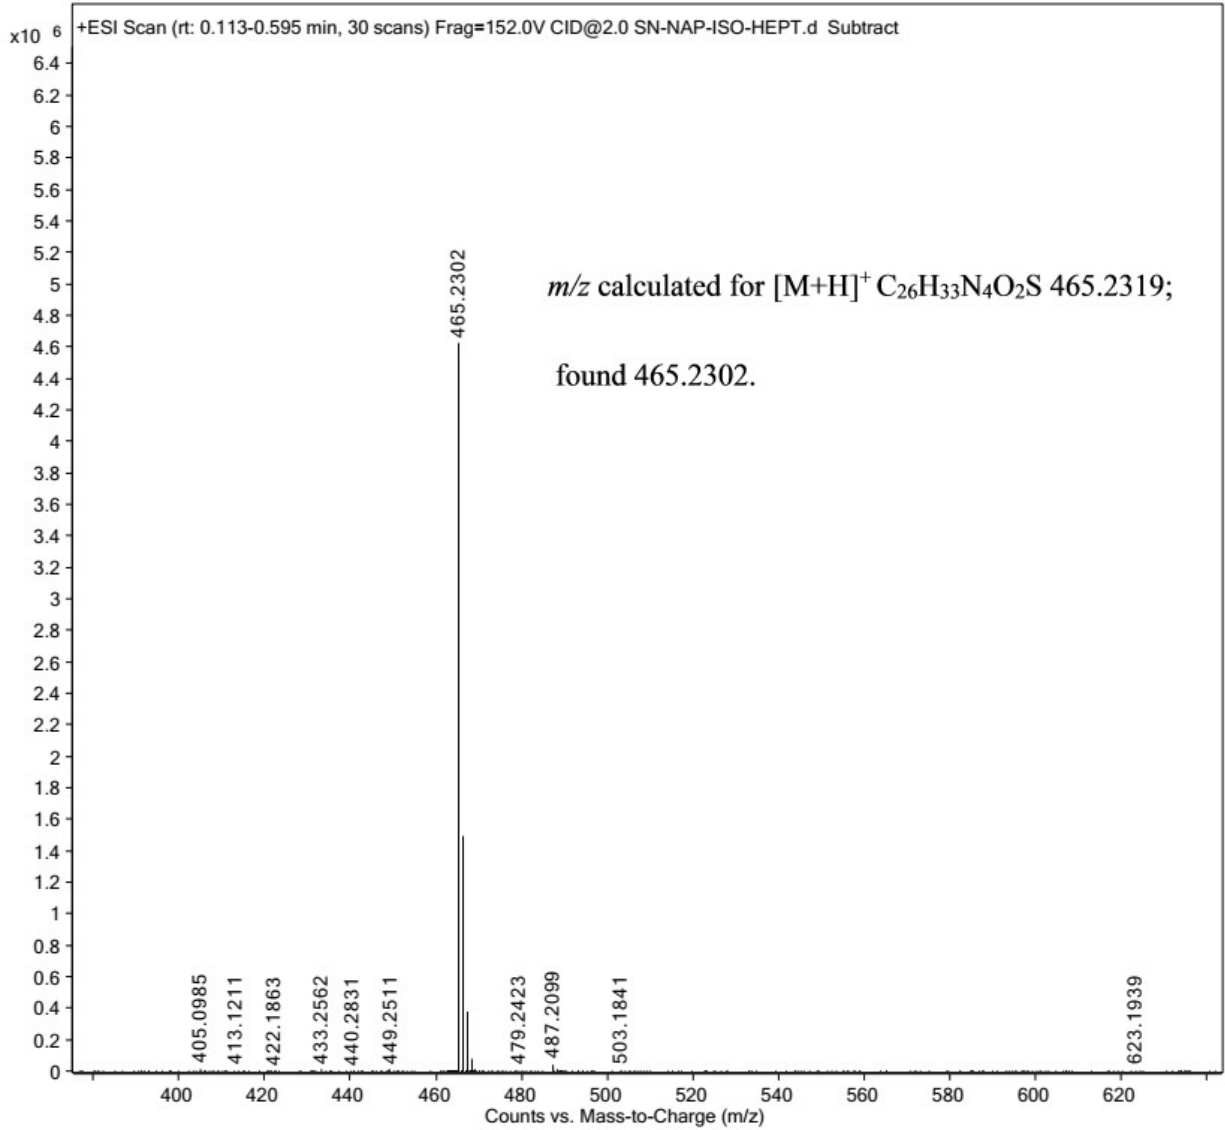



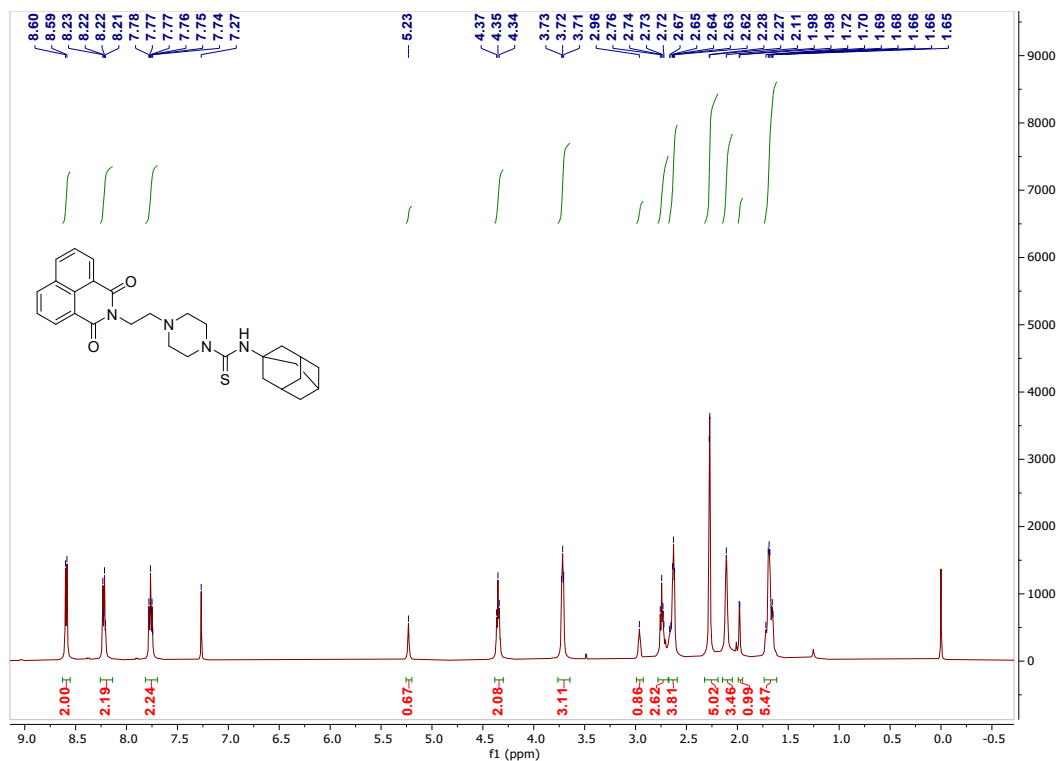

**<sup>1</sup>H spectrum for compound **4o** (500 MHz: CDCl<sub>3</sub>)**

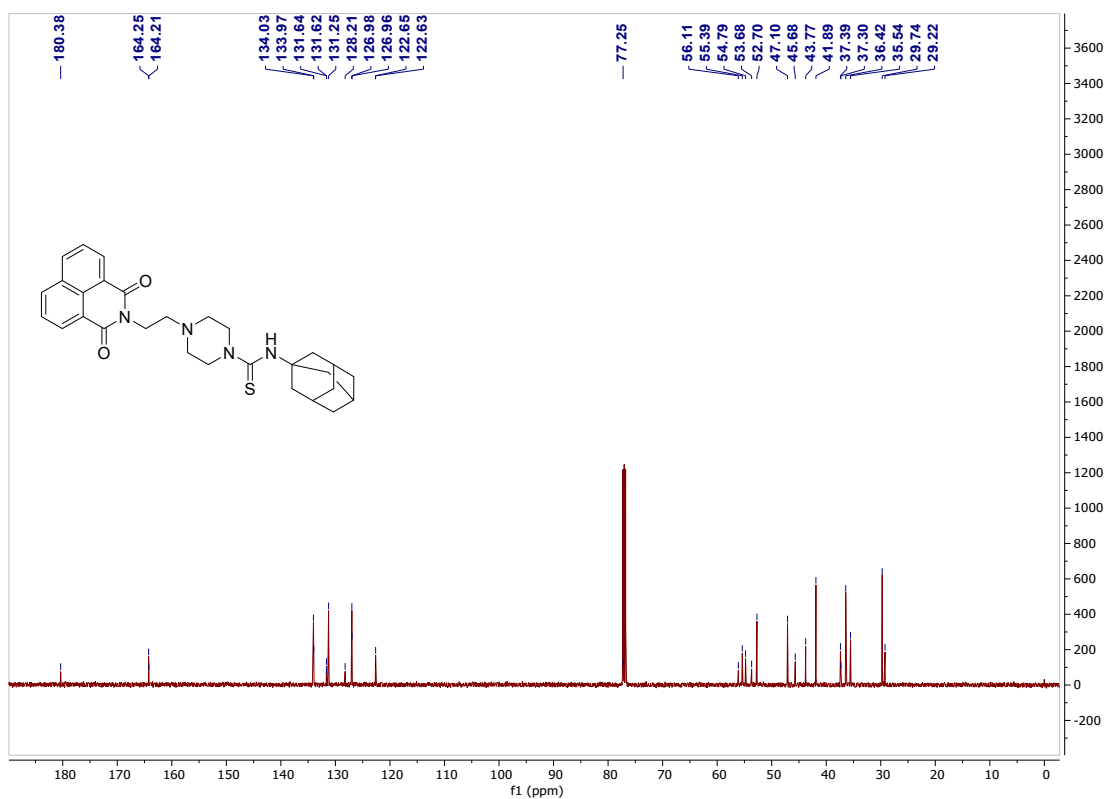

**<sup>13</sup>C spectrum for compound **4o** (125 MHz: CDCl<sub>3</sub>)**

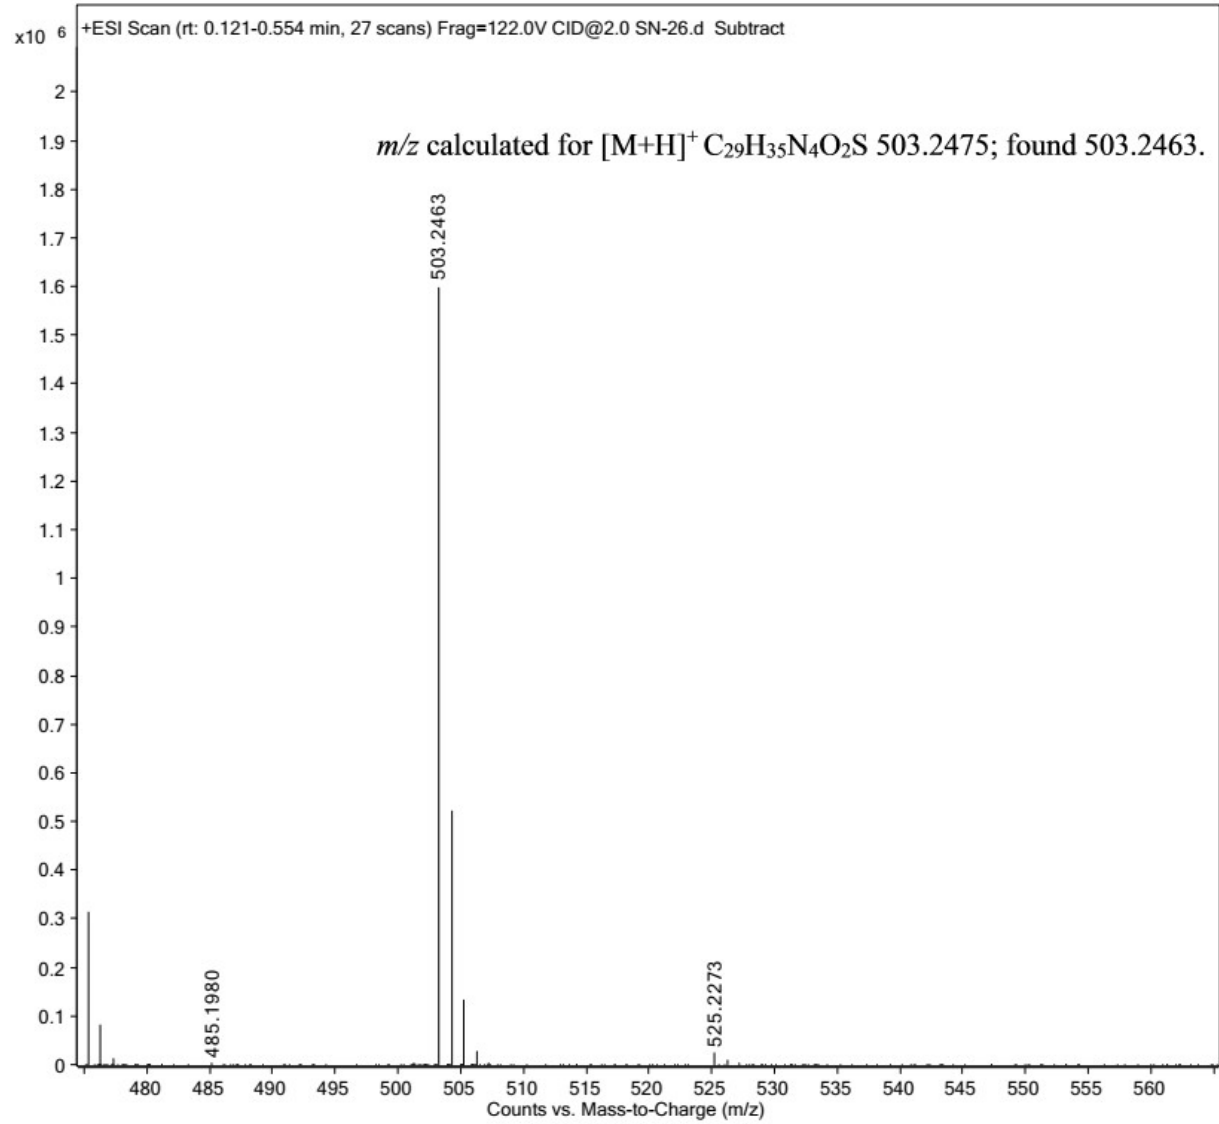

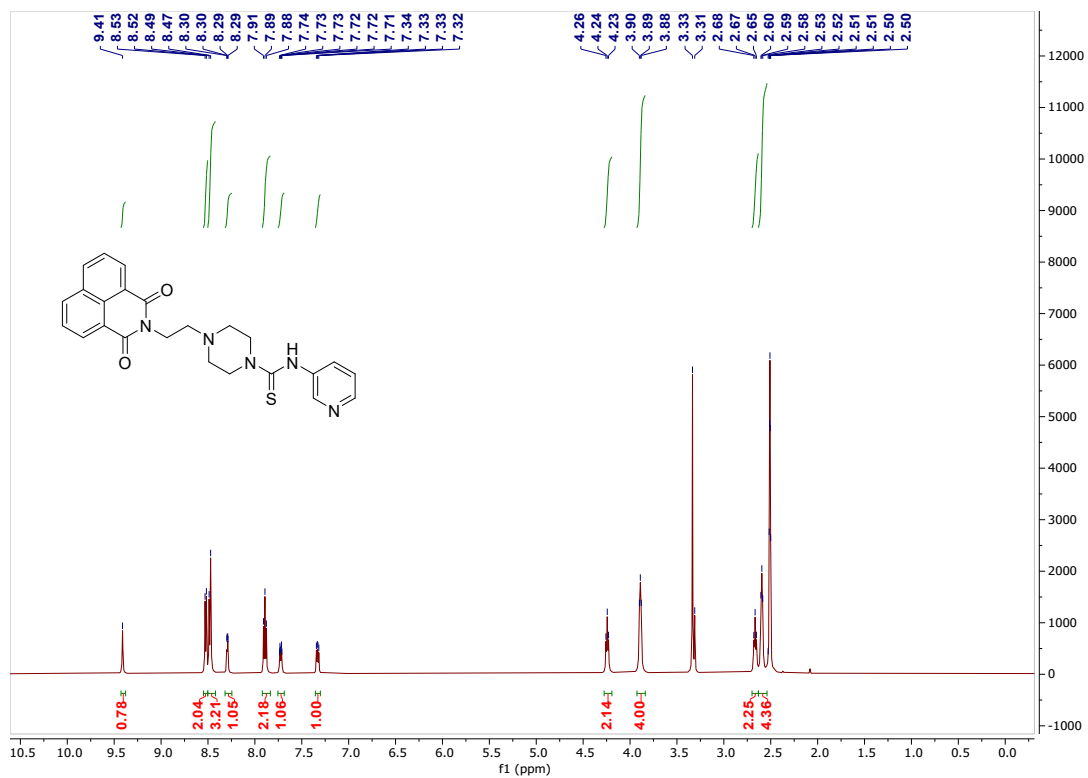

**<sup>1</sup>H spectrum for compound 4p (500 MHz: DMSO-d<sub>6</sub>)**

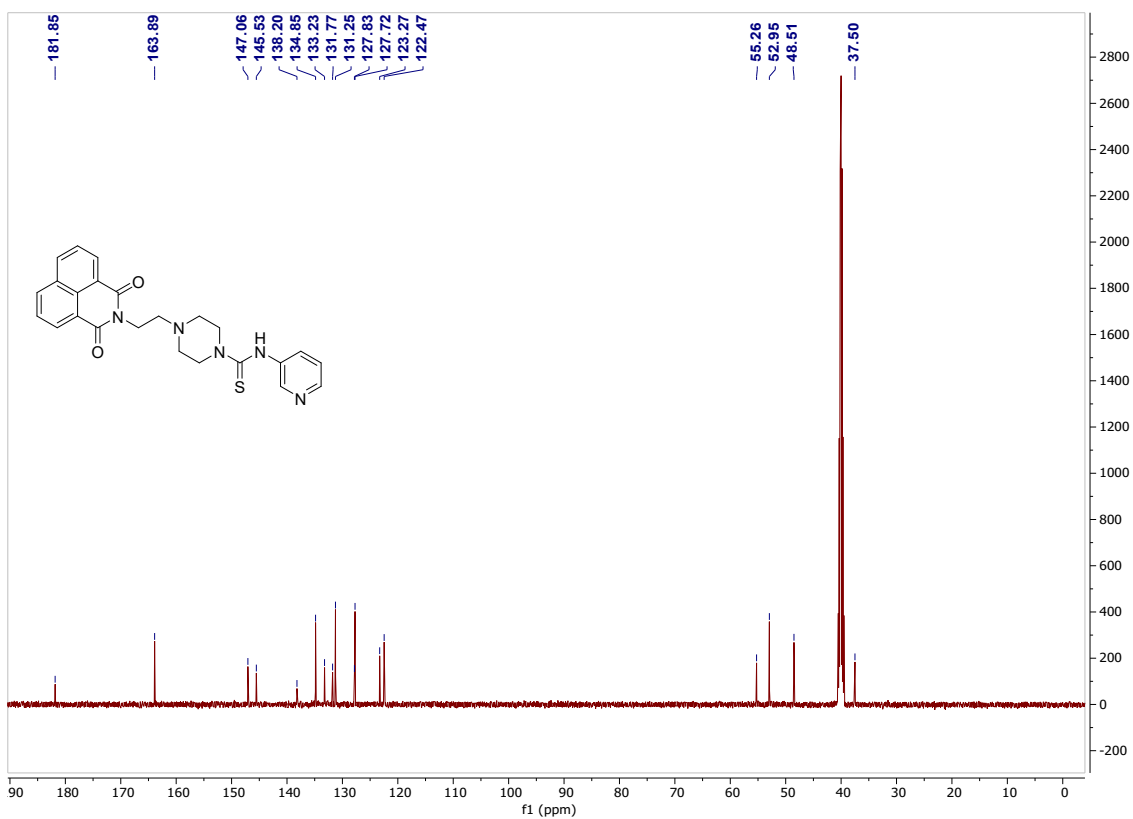

**<sup>13</sup>C spectrum for compound 4p (125 MHz: DMSO-d<sub>6</sub>)**

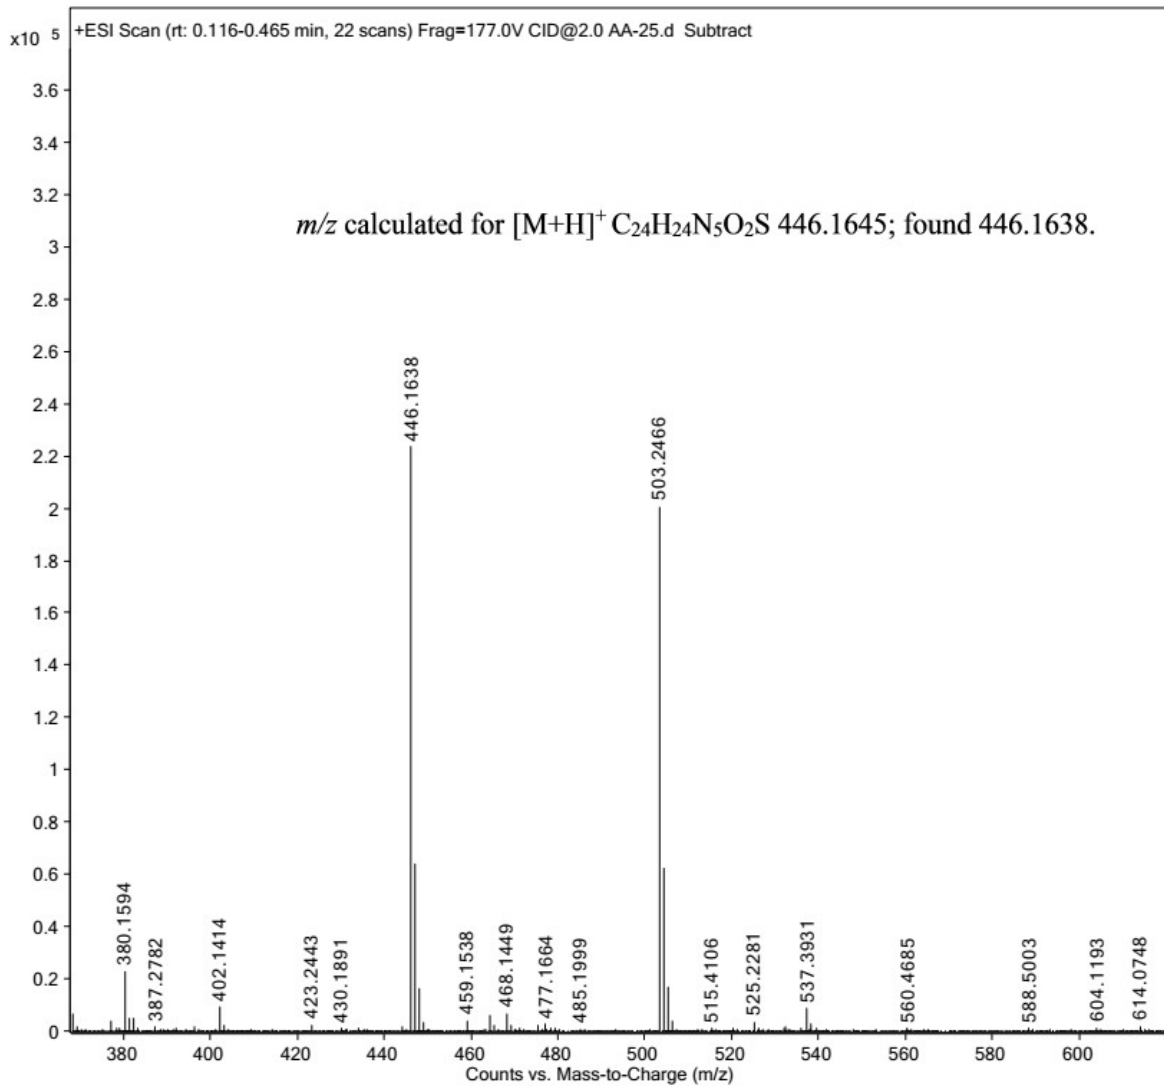

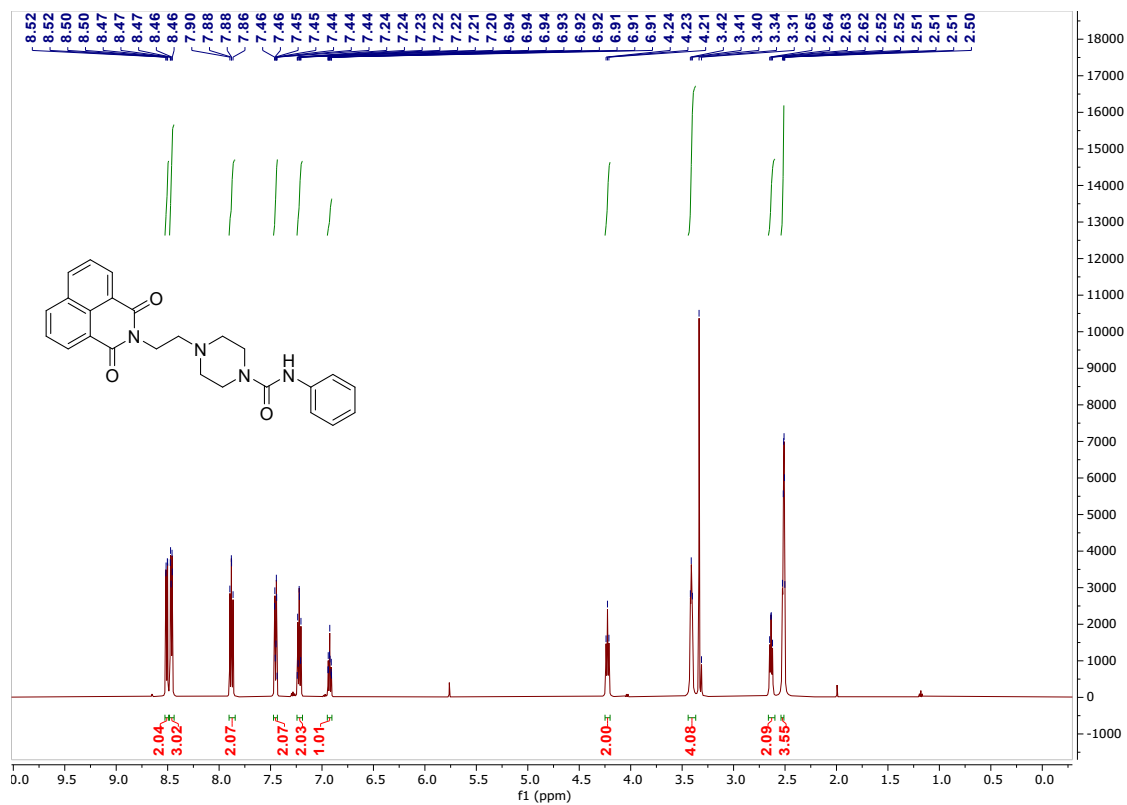

**<sup>1</sup>H spectrum for compound **4q** (500 MHz: DMSO-*d*<sub>6</sub>)**

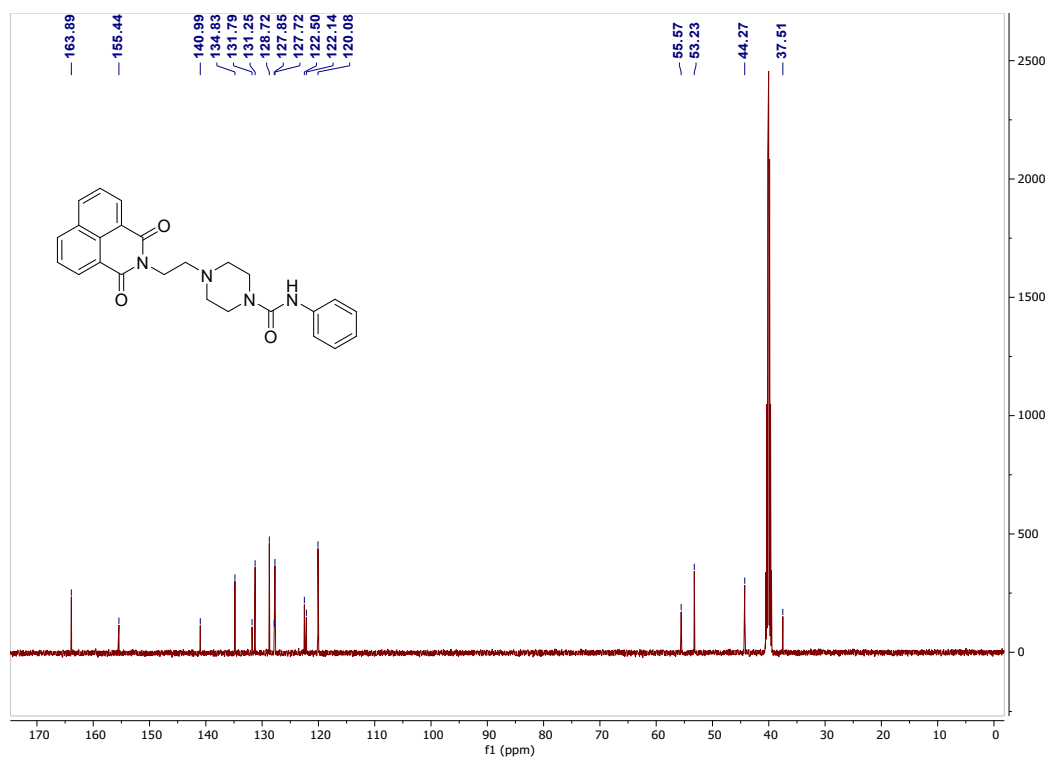

**<sup>13</sup>C spectrum for compound **4q** (125 MHz: DMSO-*d*<sub>6</sub>)**

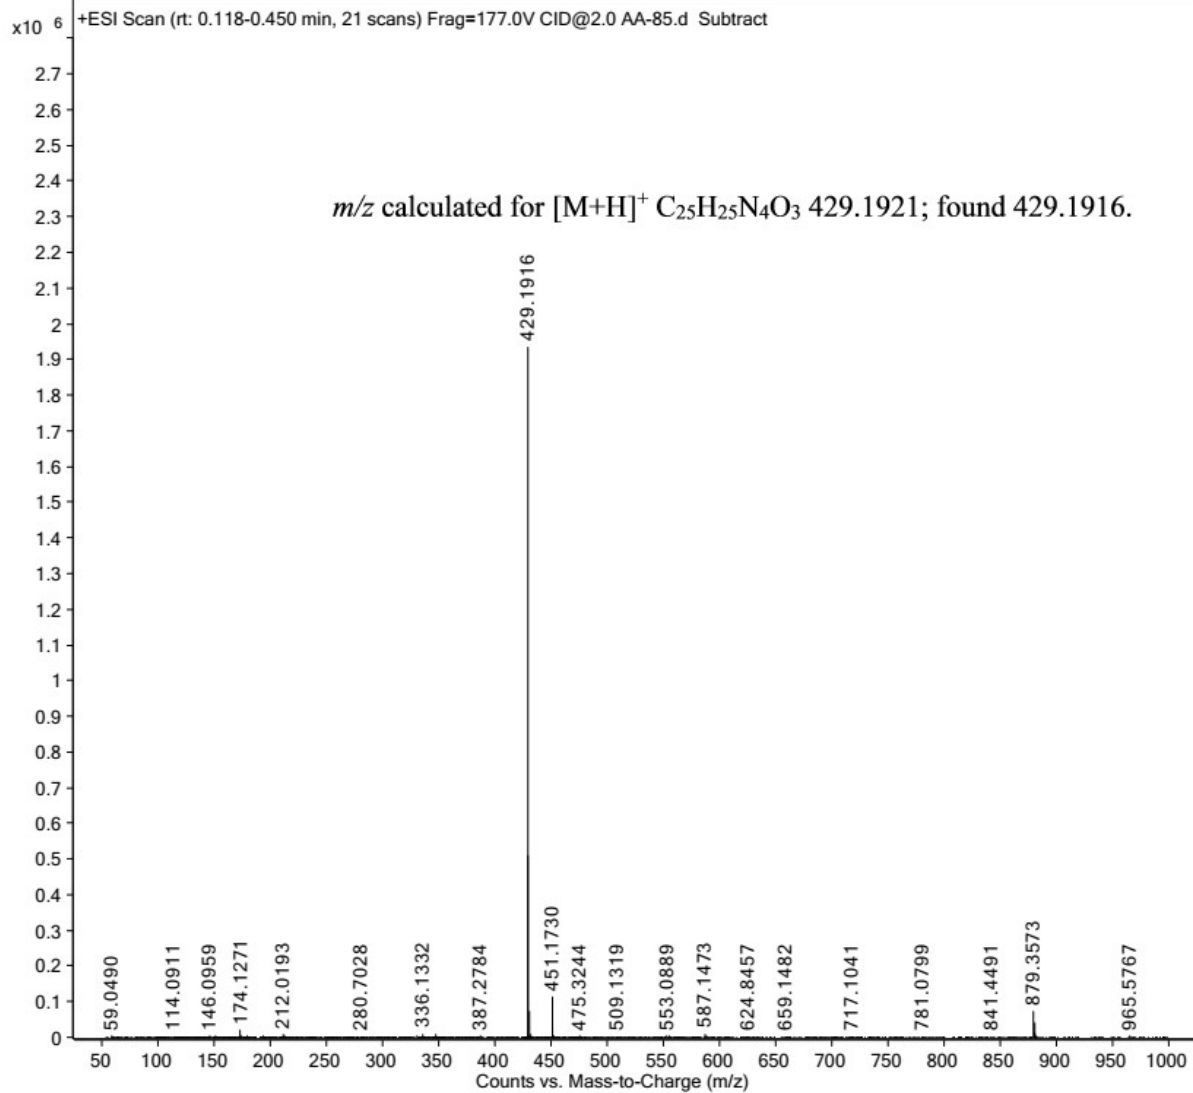

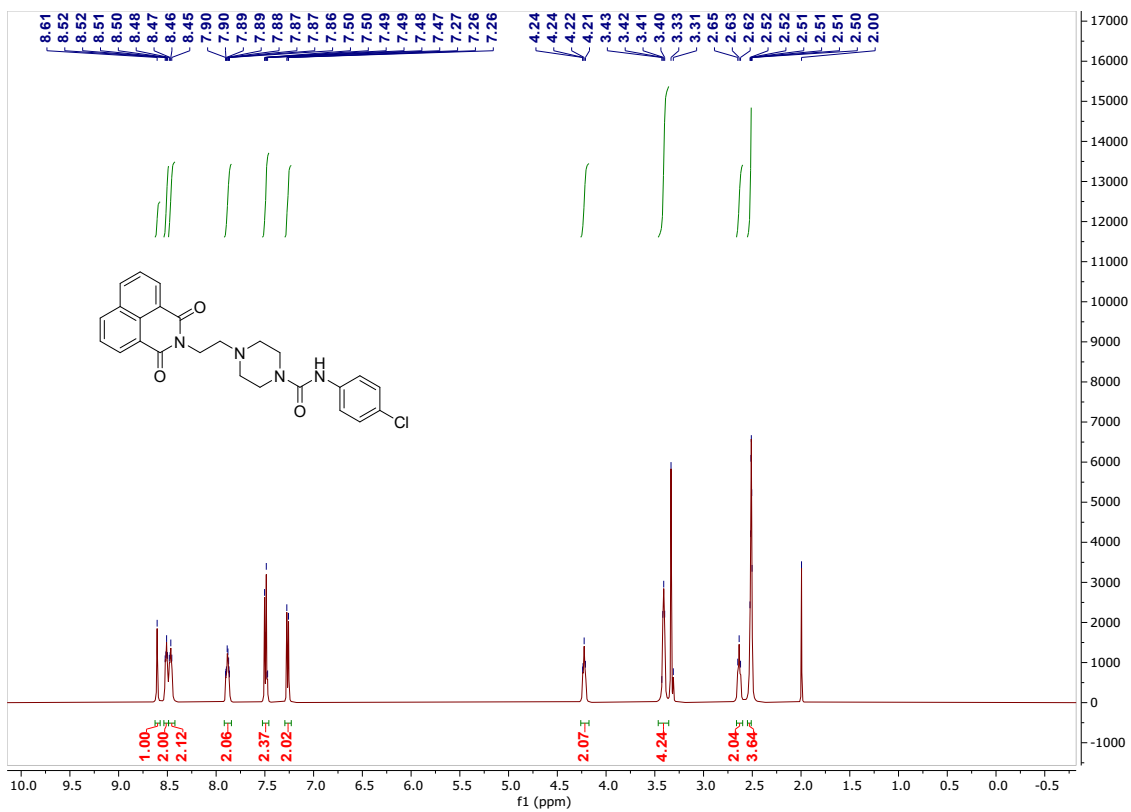

**<sup>1</sup>H spectrum for compound 4r (500 MHz: DMSO-d<sub>6</sub>)**

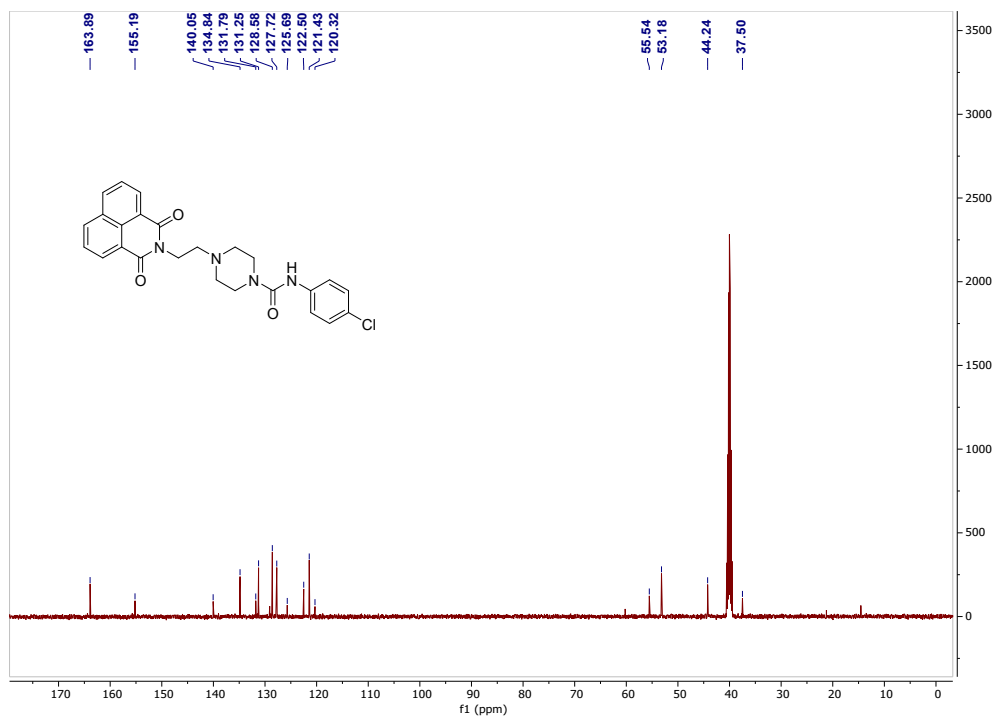

**<sup>13</sup>C spectrum for compound 4r (125 MHz: DMSO-d<sub>6</sub>)**

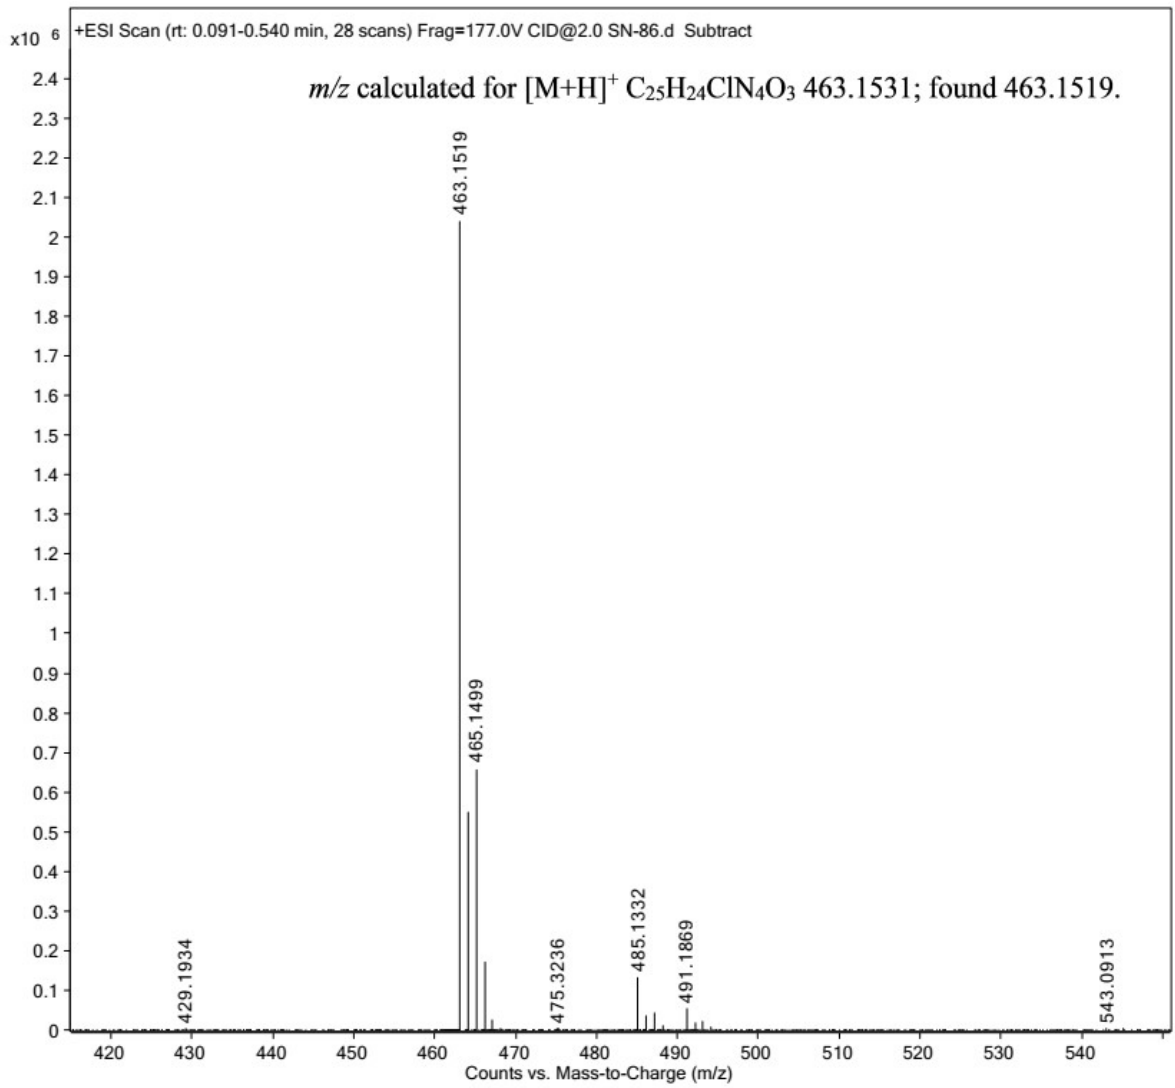



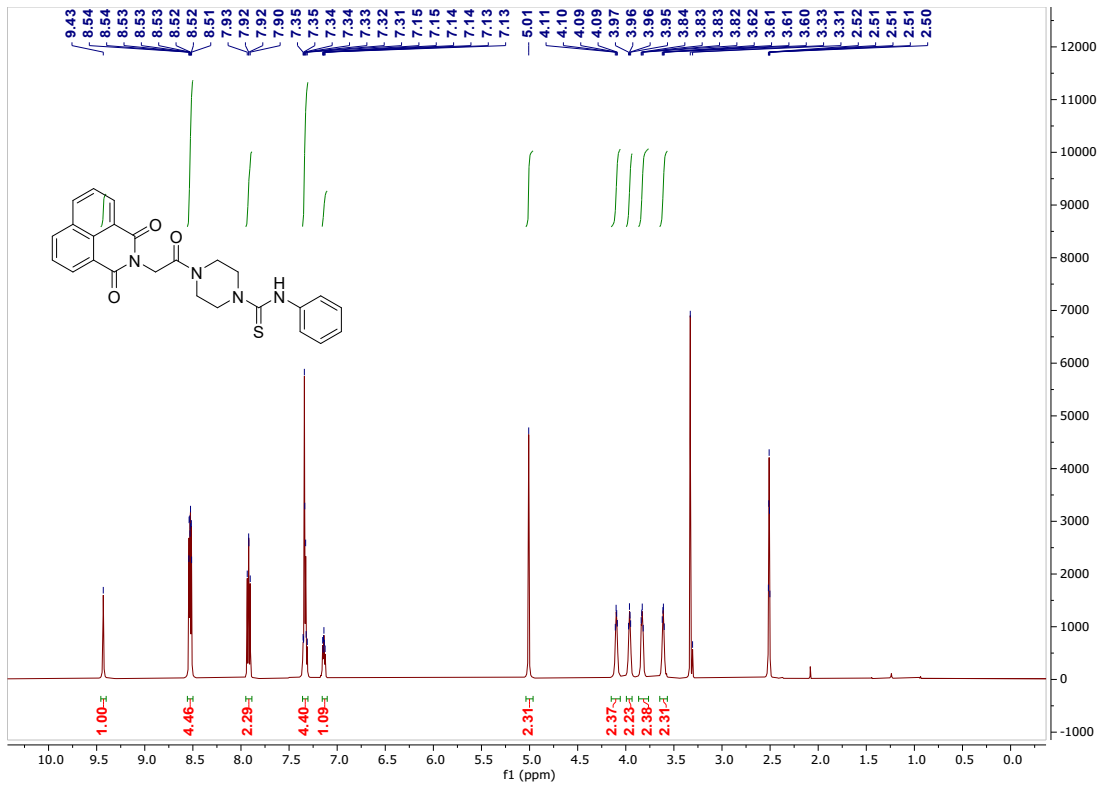

<sup>1</sup>H spectrum for compound 9a (500 MHz: DMSO-*d*<sub>6</sub>)

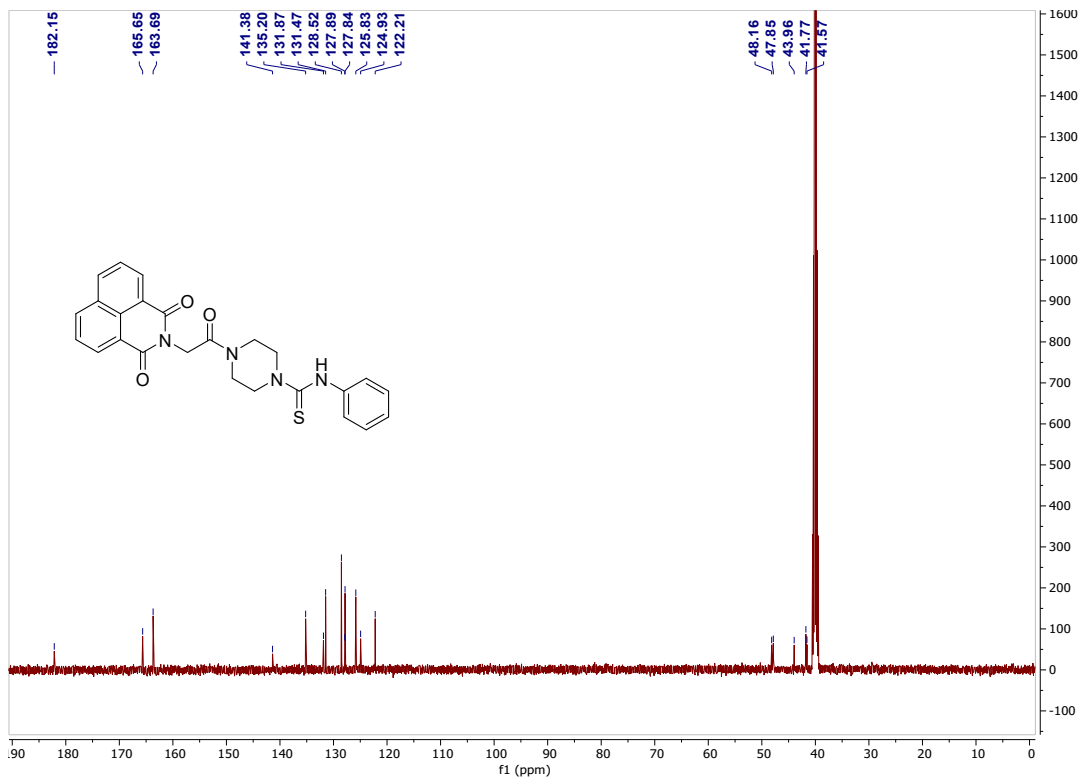

<sup>13</sup>C spectrum for compound 9a (125 MHz: DMSO-*d*<sub>6</sub>)

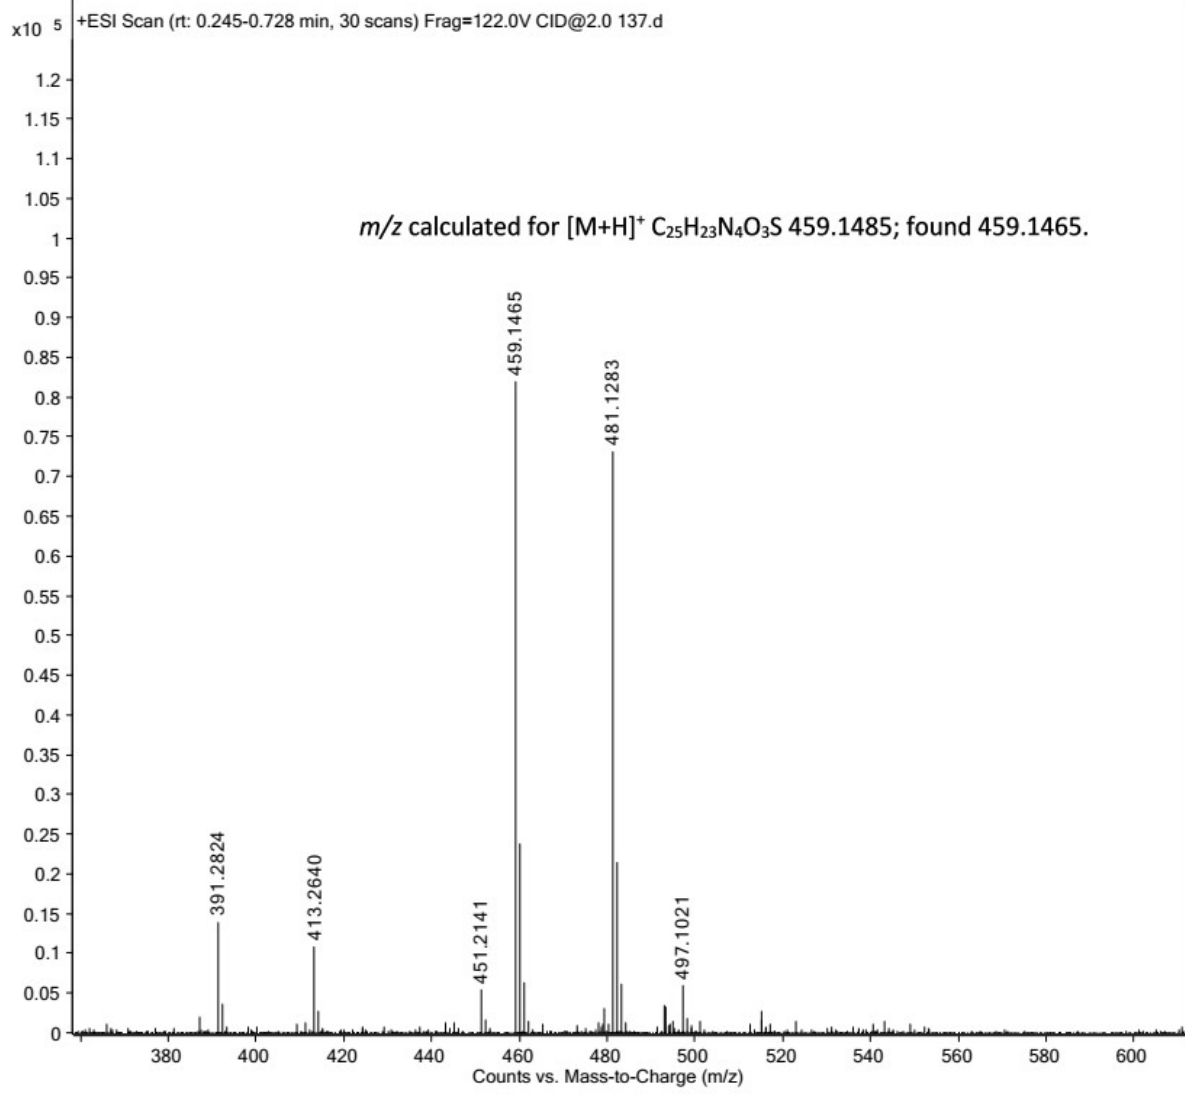

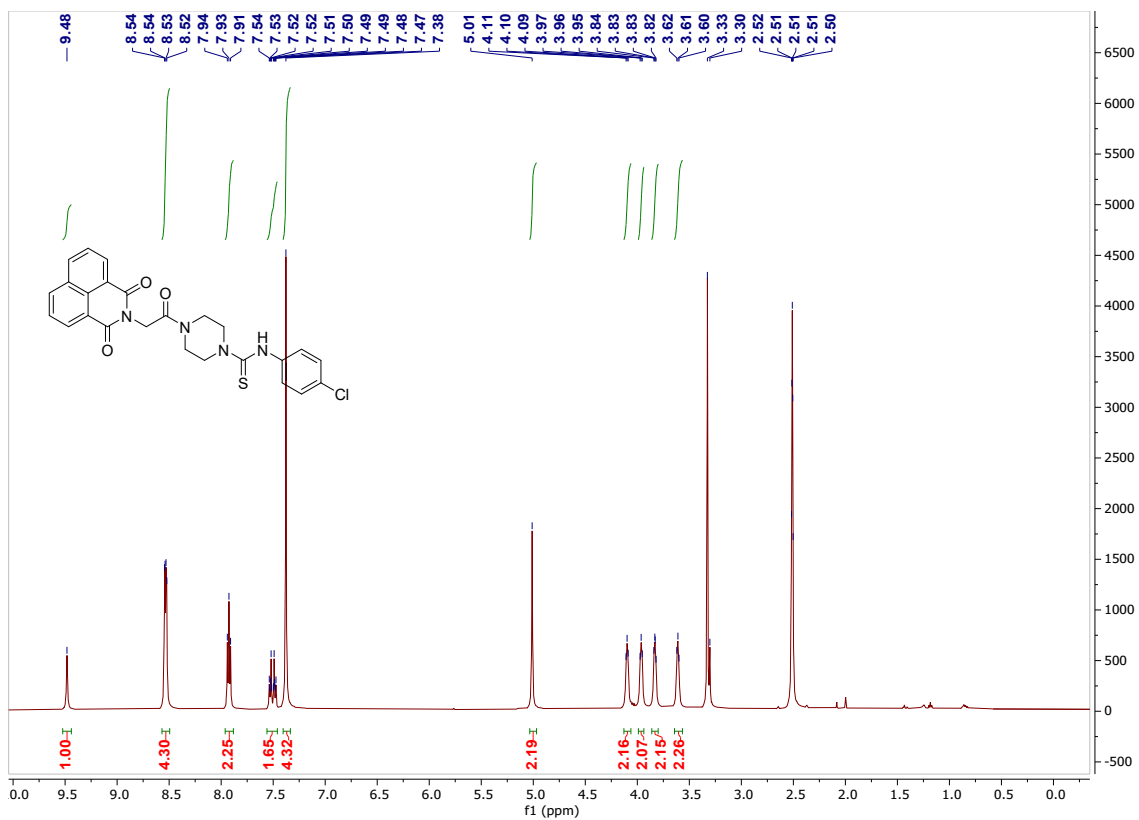

**<sup>1</sup>H NMR spectrum for compound **9b** (500 MHz: DMSO-*d*<sub>6</sub>)**

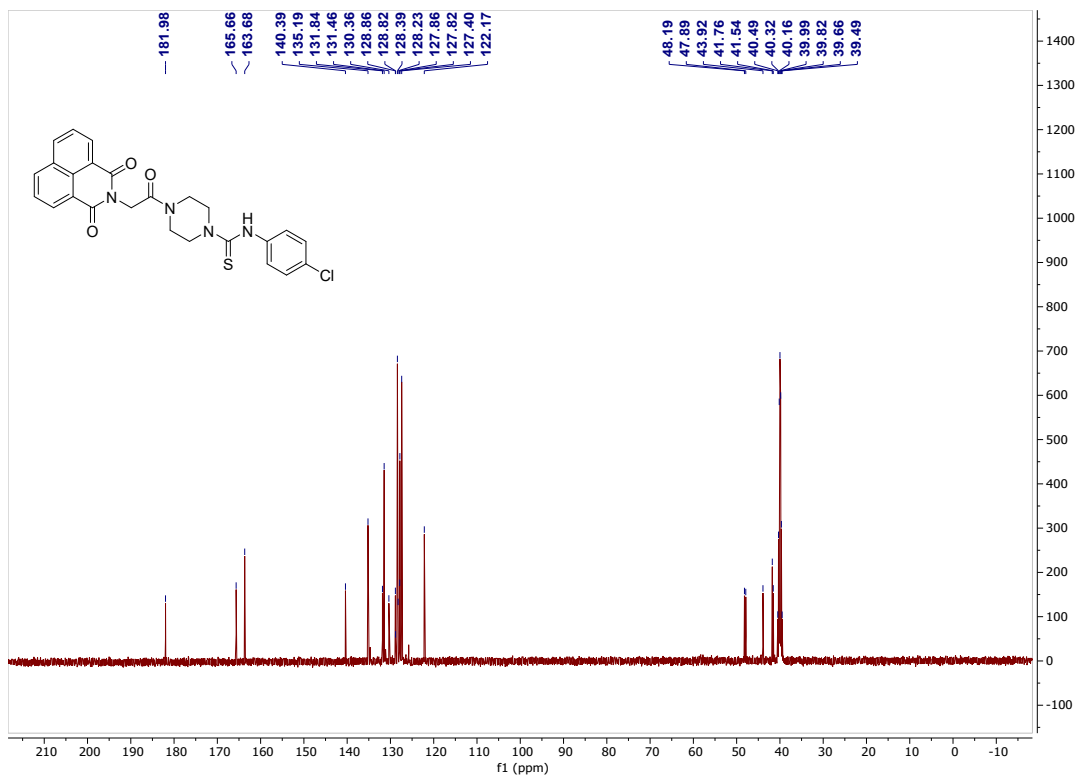

**<sup>13</sup>C NMR spectrum for compound **9b** (125 MHz: DMSO-*d*<sub>6</sub>)**

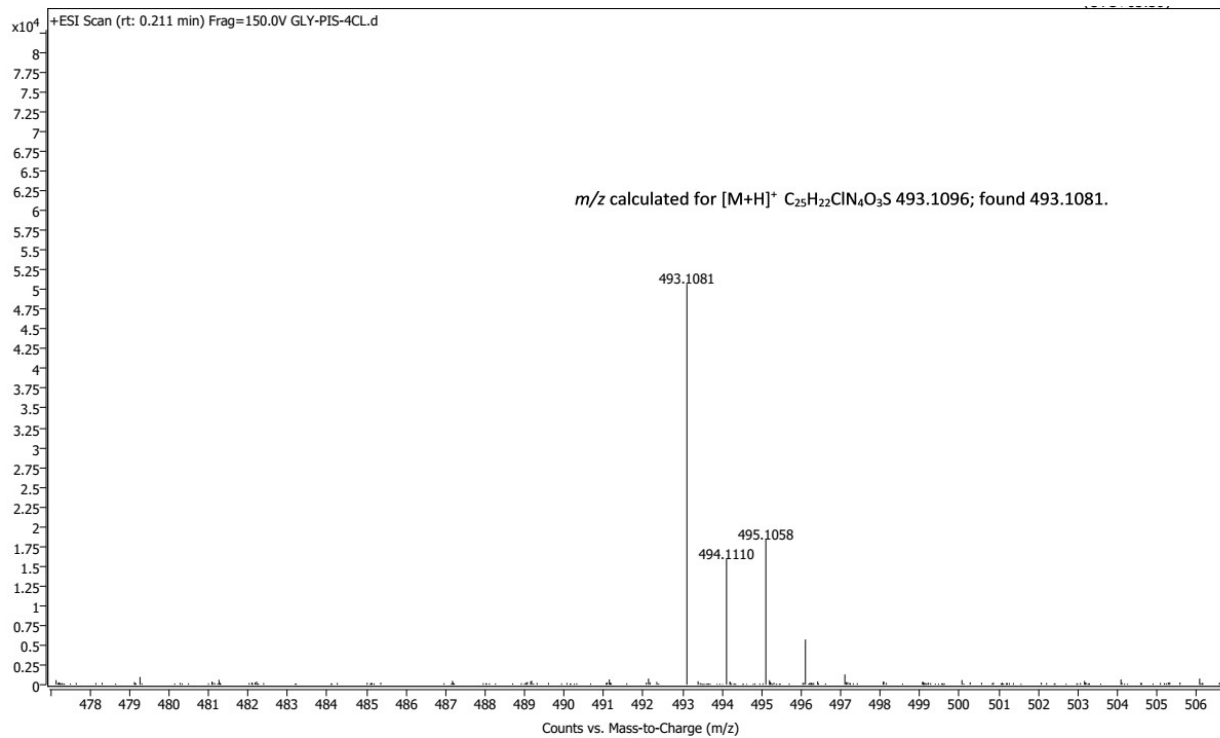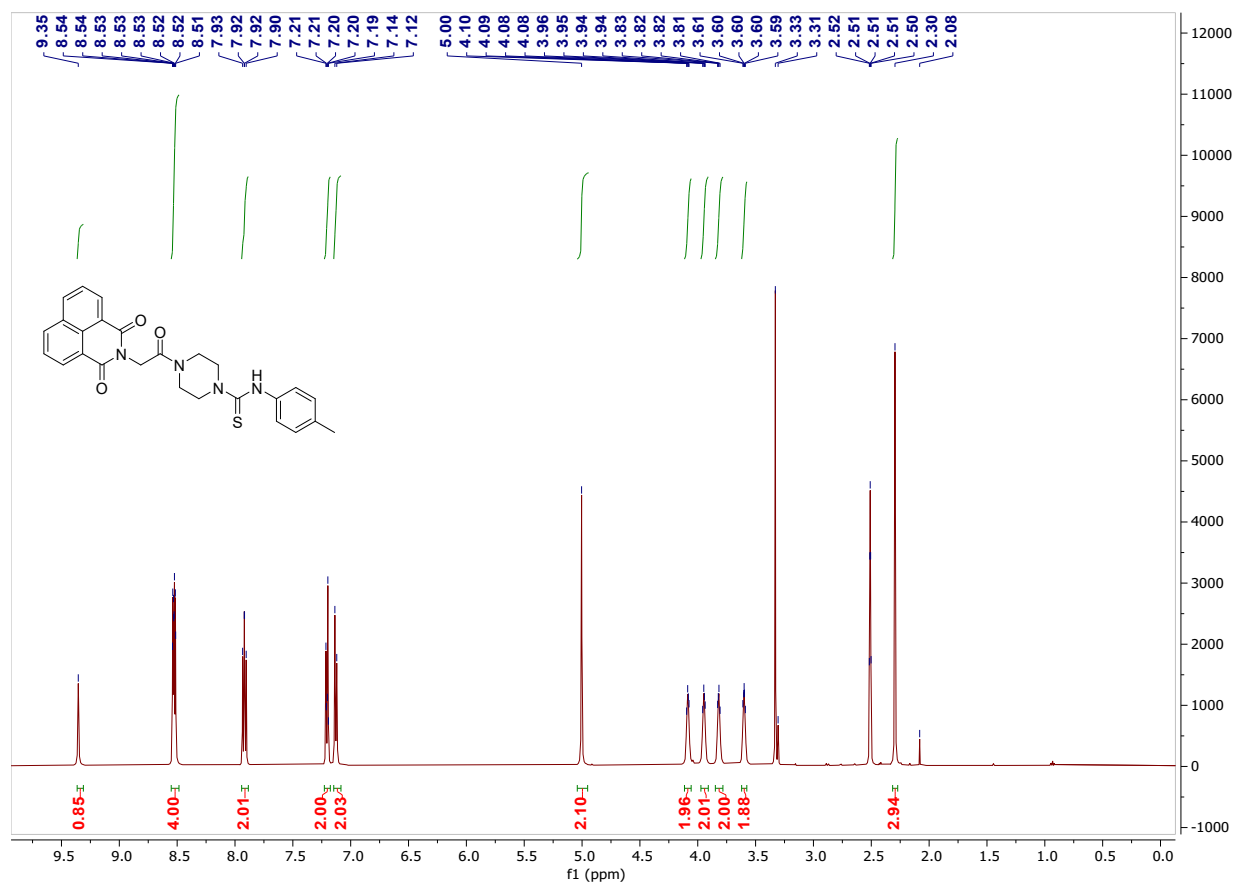

<sup>1</sup>H spectrum for compound **9c** (500 MHz: DMSO-*d*<sub>6</sub>)

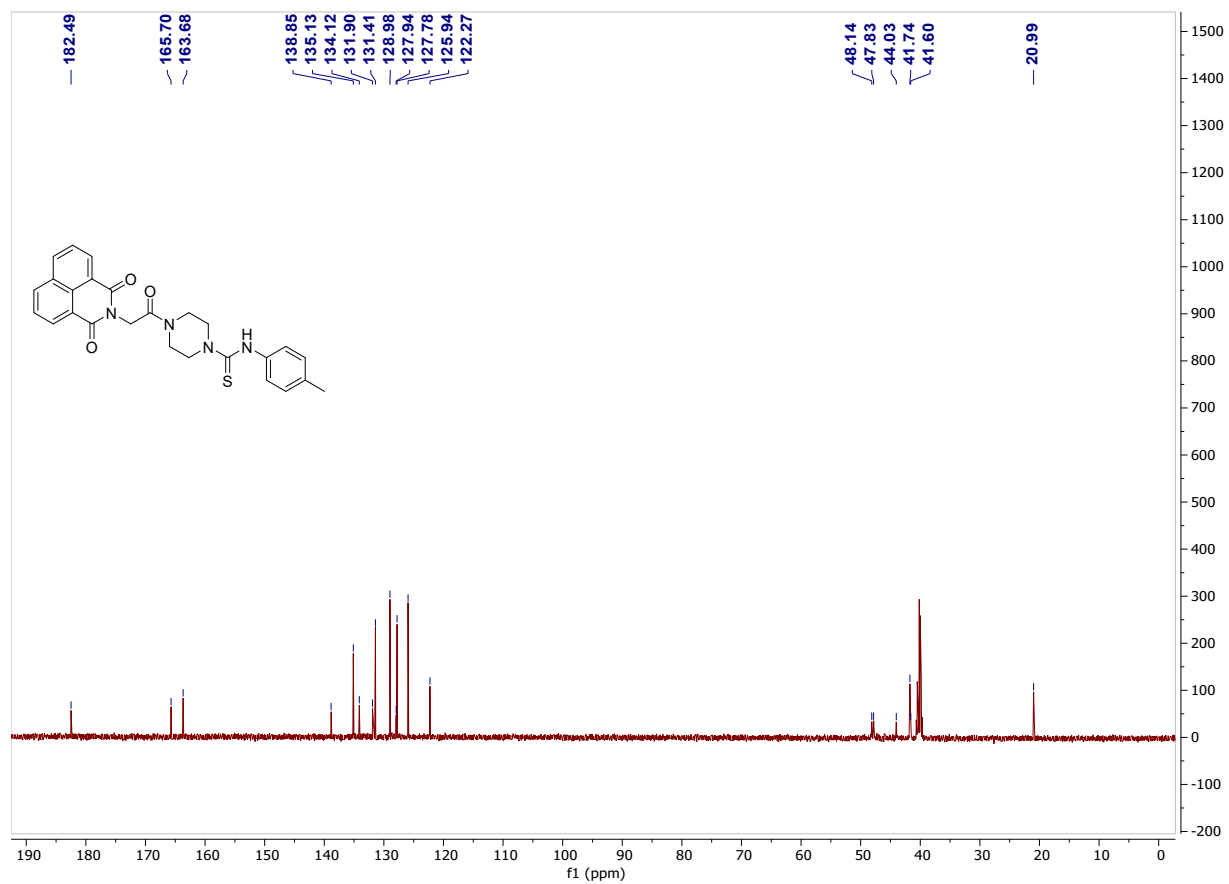

$^{13}\text{C}$  spectrum for compound 9c (125 MHz: DMSO- $d_6$ )

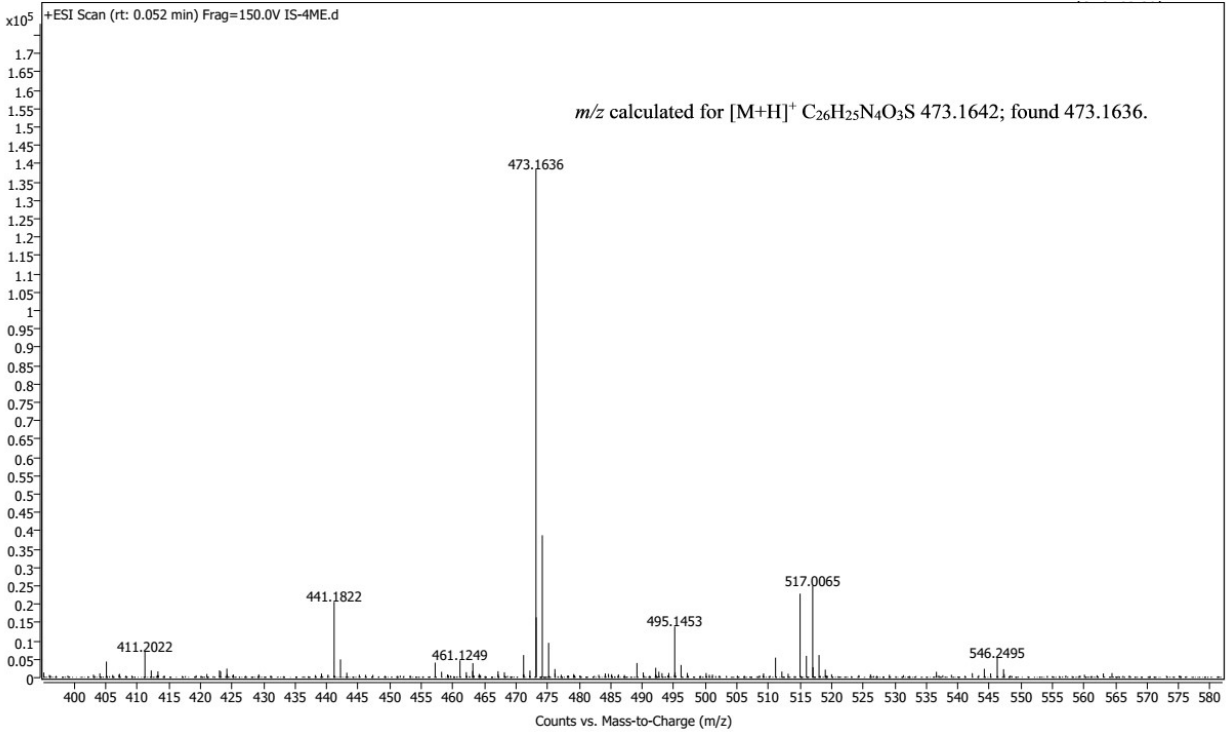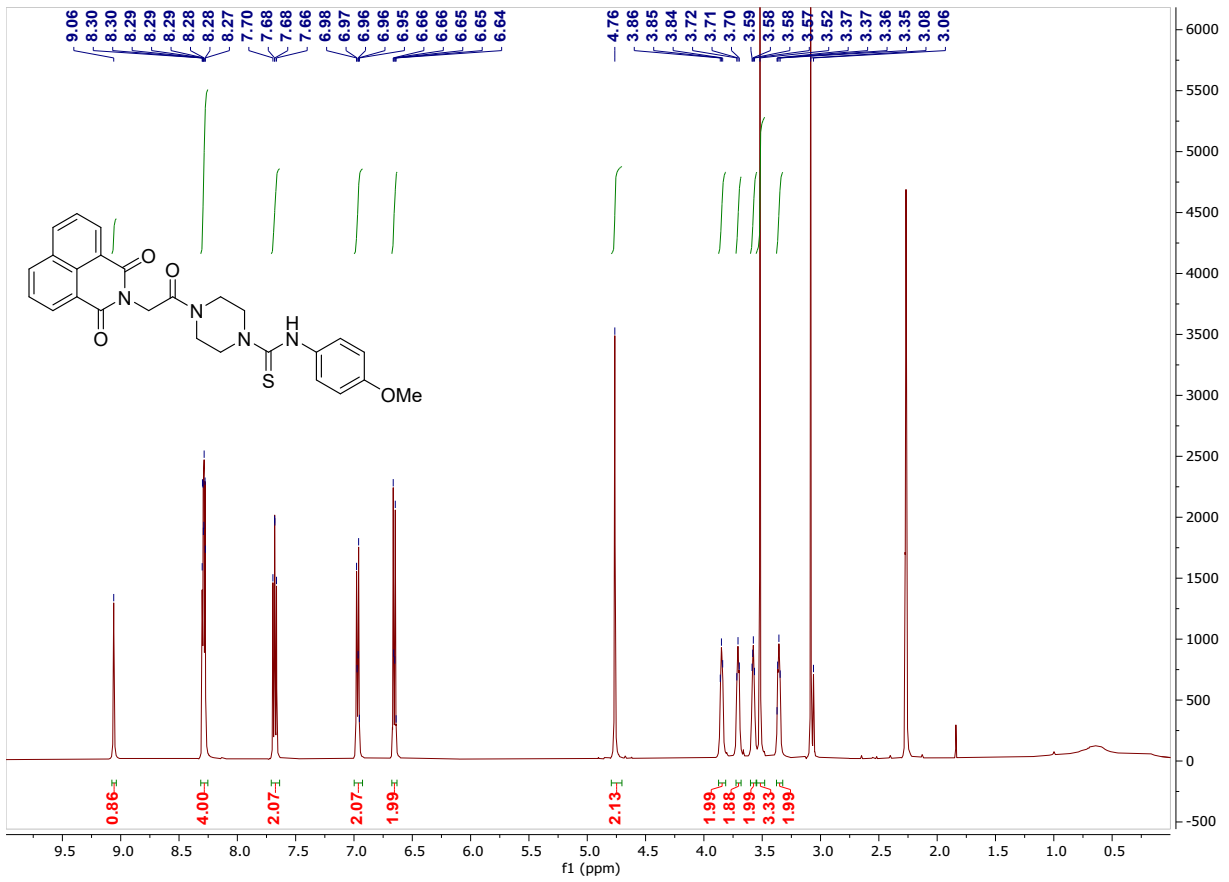

<sup>1</sup>H spectrum for compound **9d** (500 MHz: DMSO-*d*<sub>6</sub>)

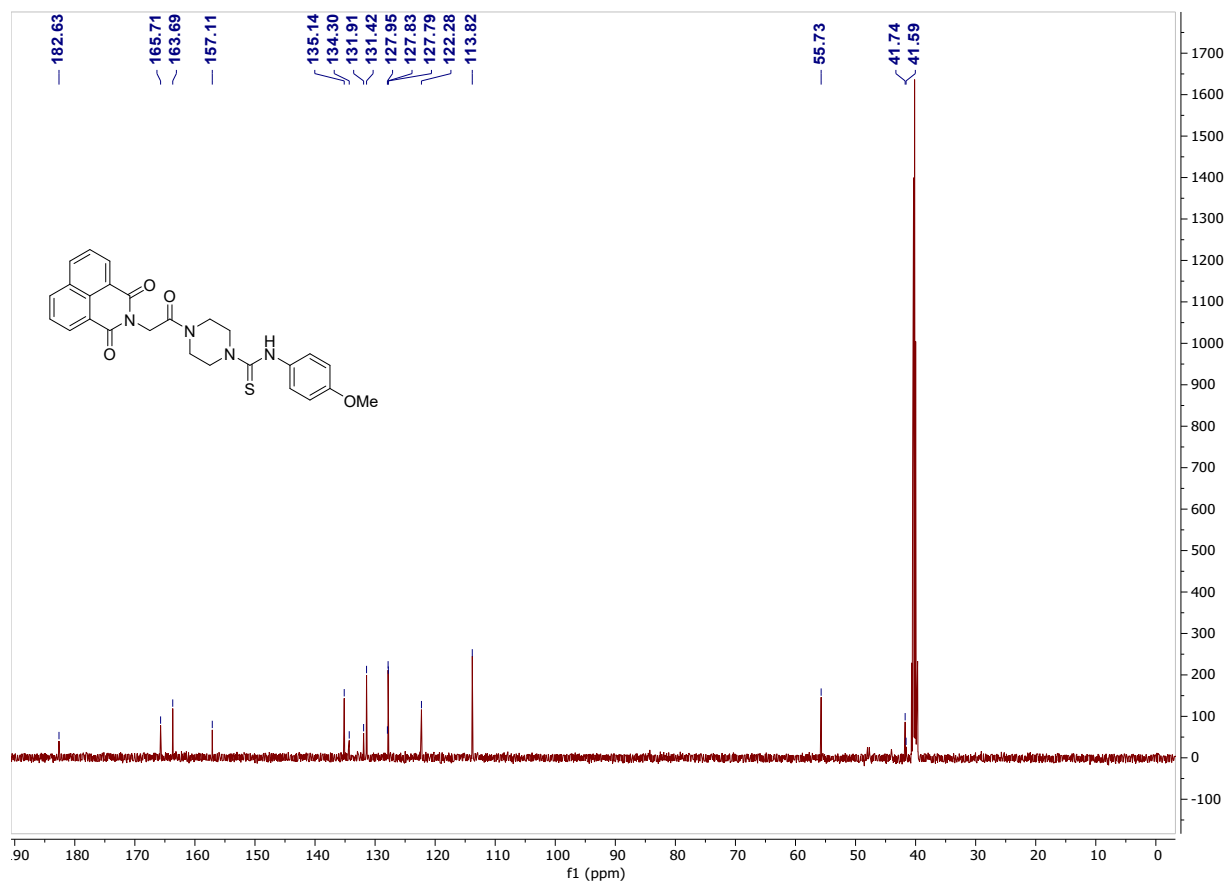

$^{13}\text{C}$  spectrum for compound **9d** (125 MHz:  $\text{DMSO-}d_6$ )

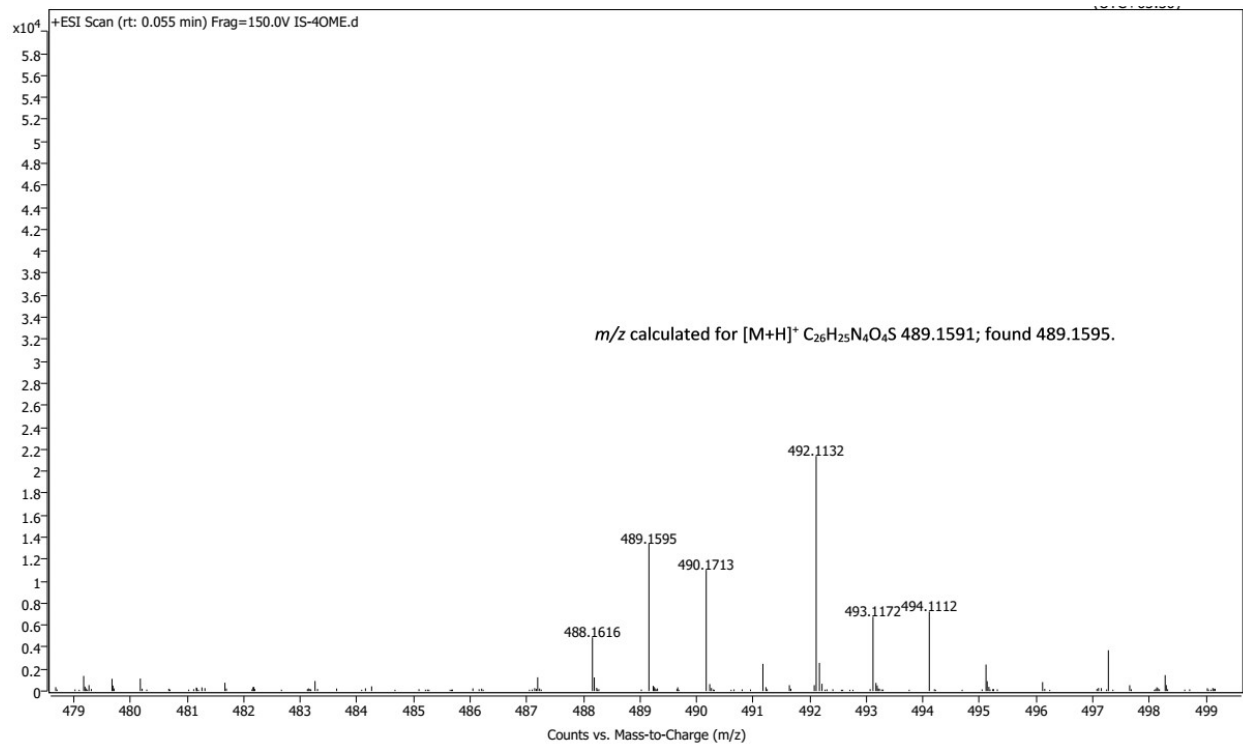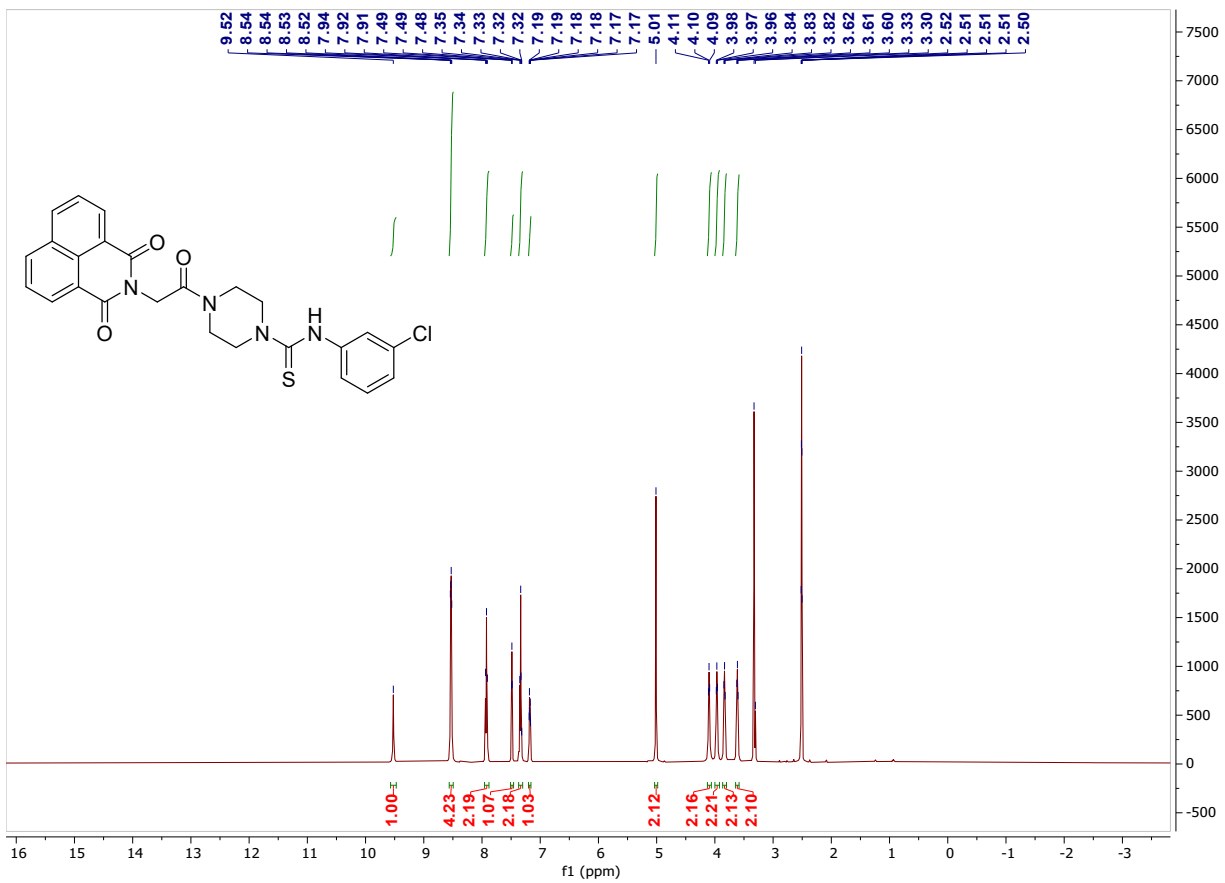

<sup>1</sup>H spectrum for compound 9e (500 MHz: DMSO-d<sub>6</sub>)



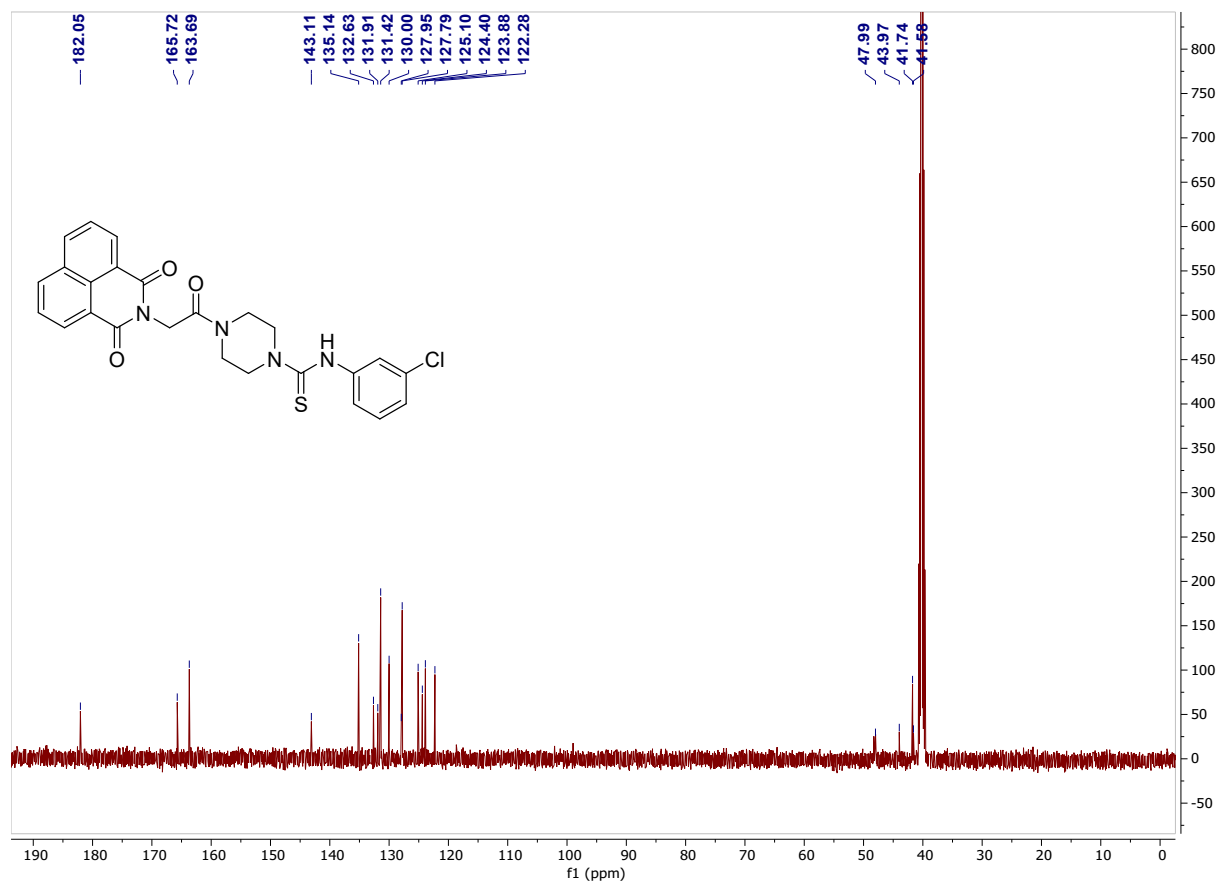

$^{13}\text{C}$  spectrum for compound 9e (125 MHz: DMSO- $d_6$ )

x10<sup>4</sup>

+ESI Scan (rt: 0.893 min) Frag=122.0V CID@2.0 142.d

*m/z* calculated for [M+H]<sup>+</sup> C<sub>25</sub>H<sub>22</sub>CIN<sub>4</sub>O<sub>3</sub>S 493.1096; found 493.1080.

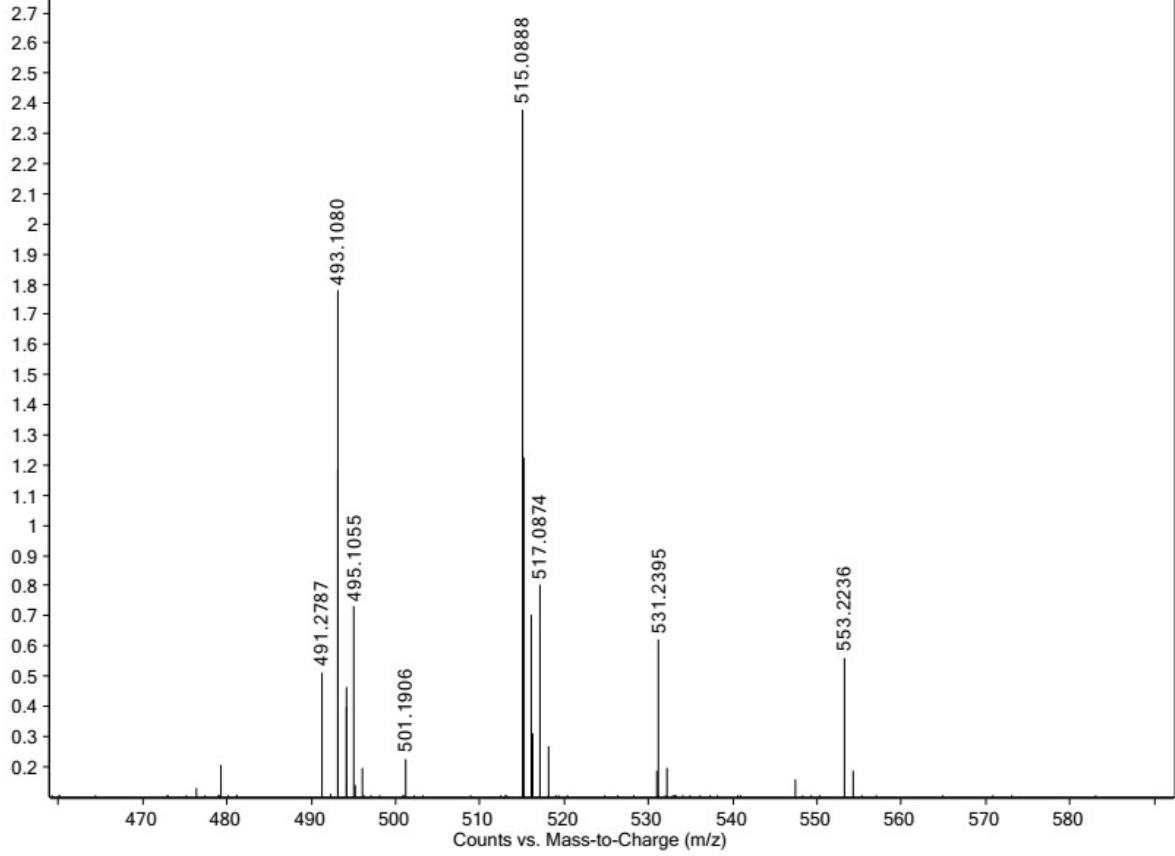

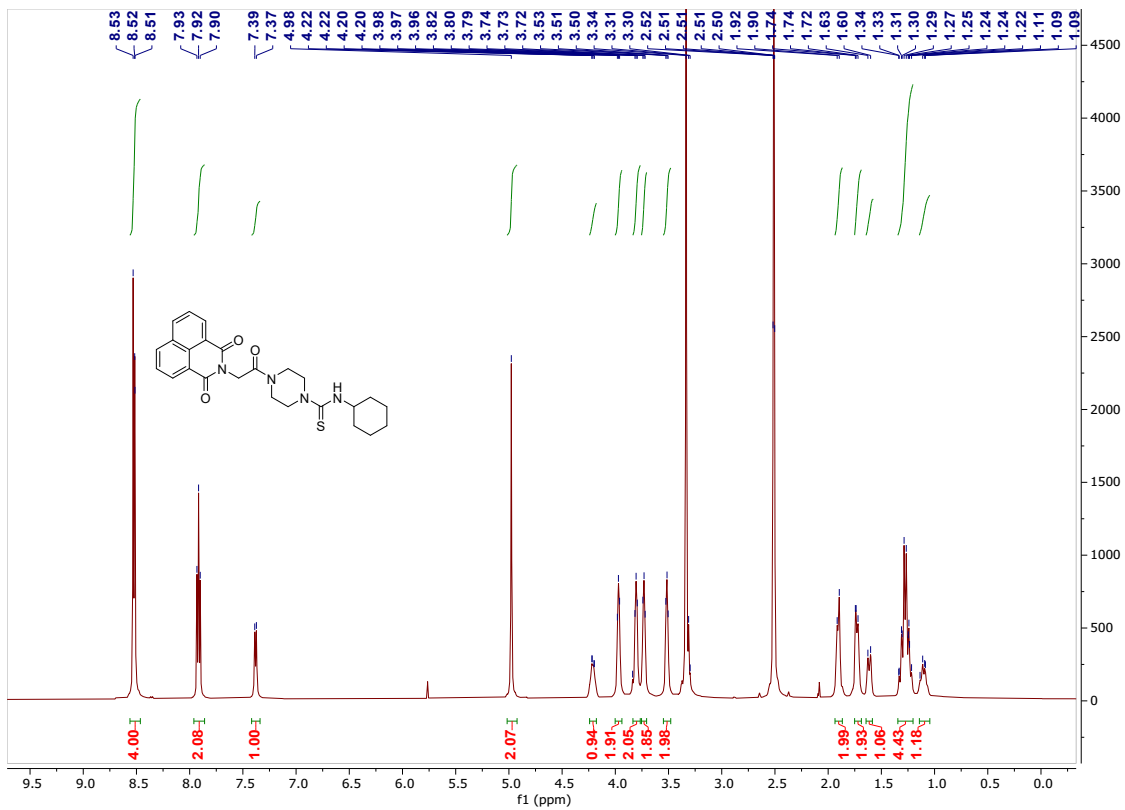

$^1\text{H}$  spectrum for compound **9f** (500 MHz:  $\text{DMSO-}d_6$ )

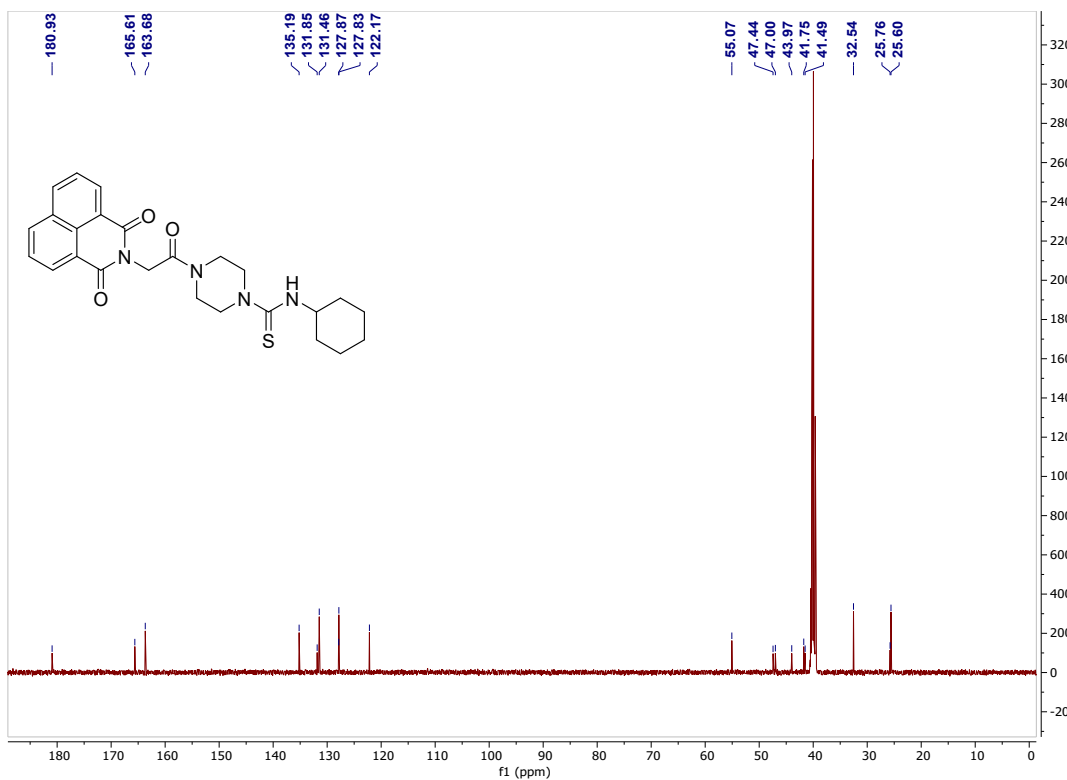

$^{13}\text{C}$  spectrum for compound **9f** (125 MHz:  $\text{DMSO-}d_6$ )

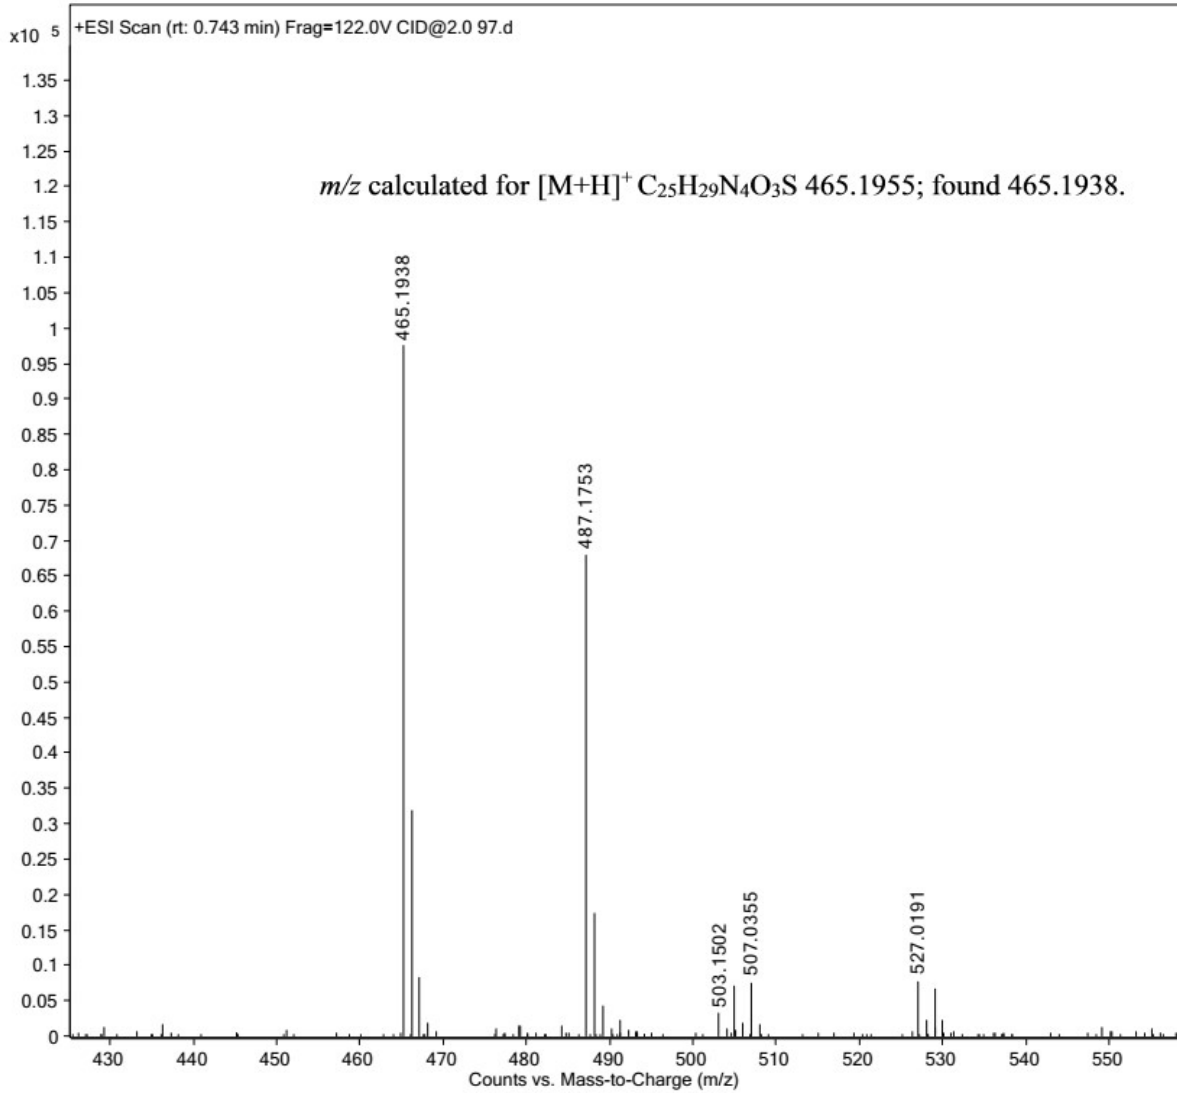

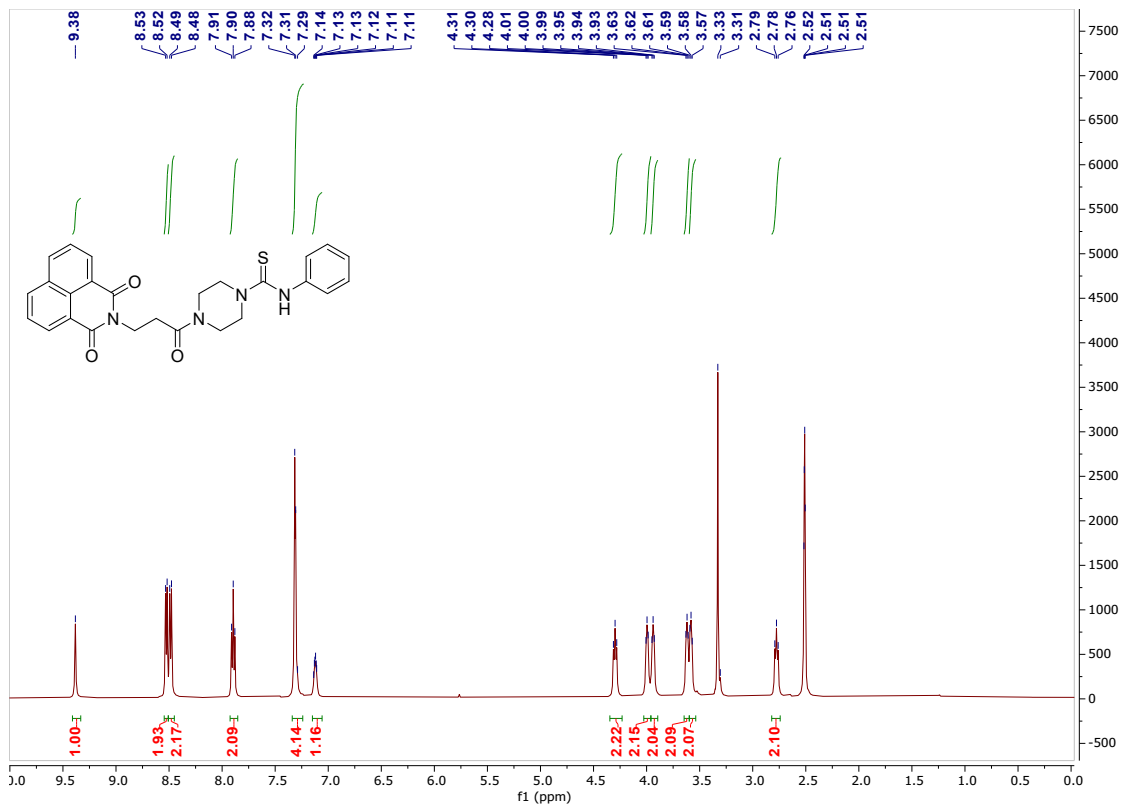

$^1\text{H}$  spectrum for compound 9g (500 MHz:  $\text{DMSO}-d_6$ )

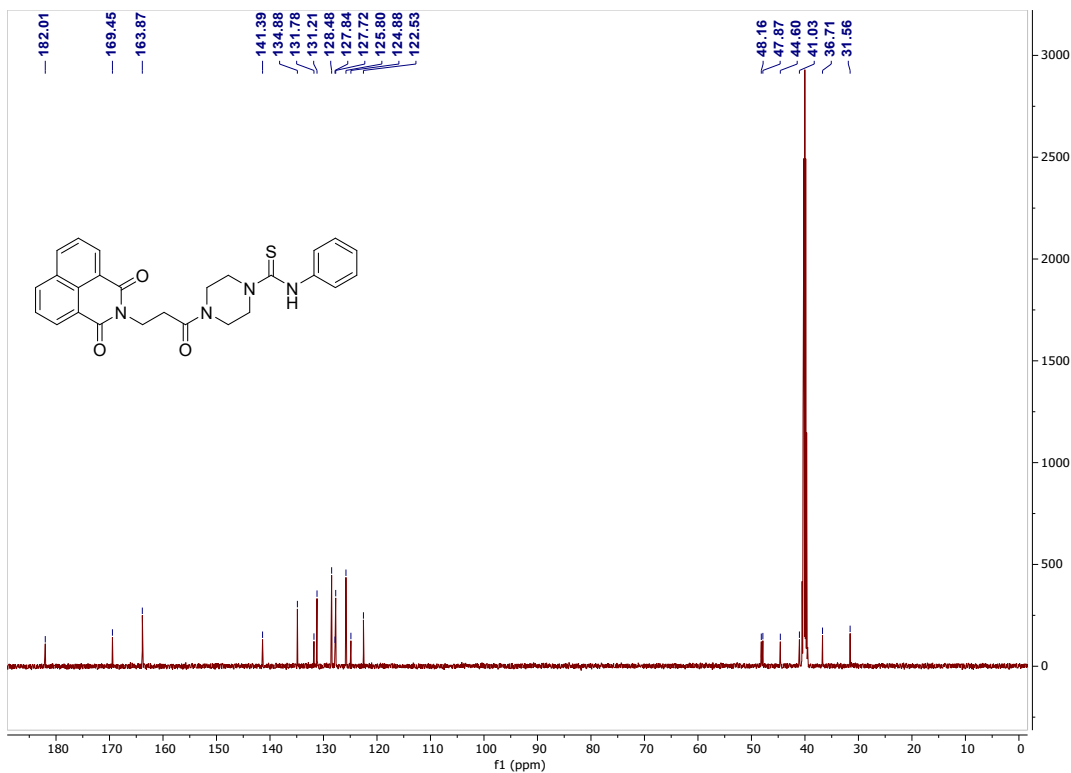

$^{13}\text{C}$  spectrum for compound 9g (125 MHz:  $\text{DMSO}-d_6$ )

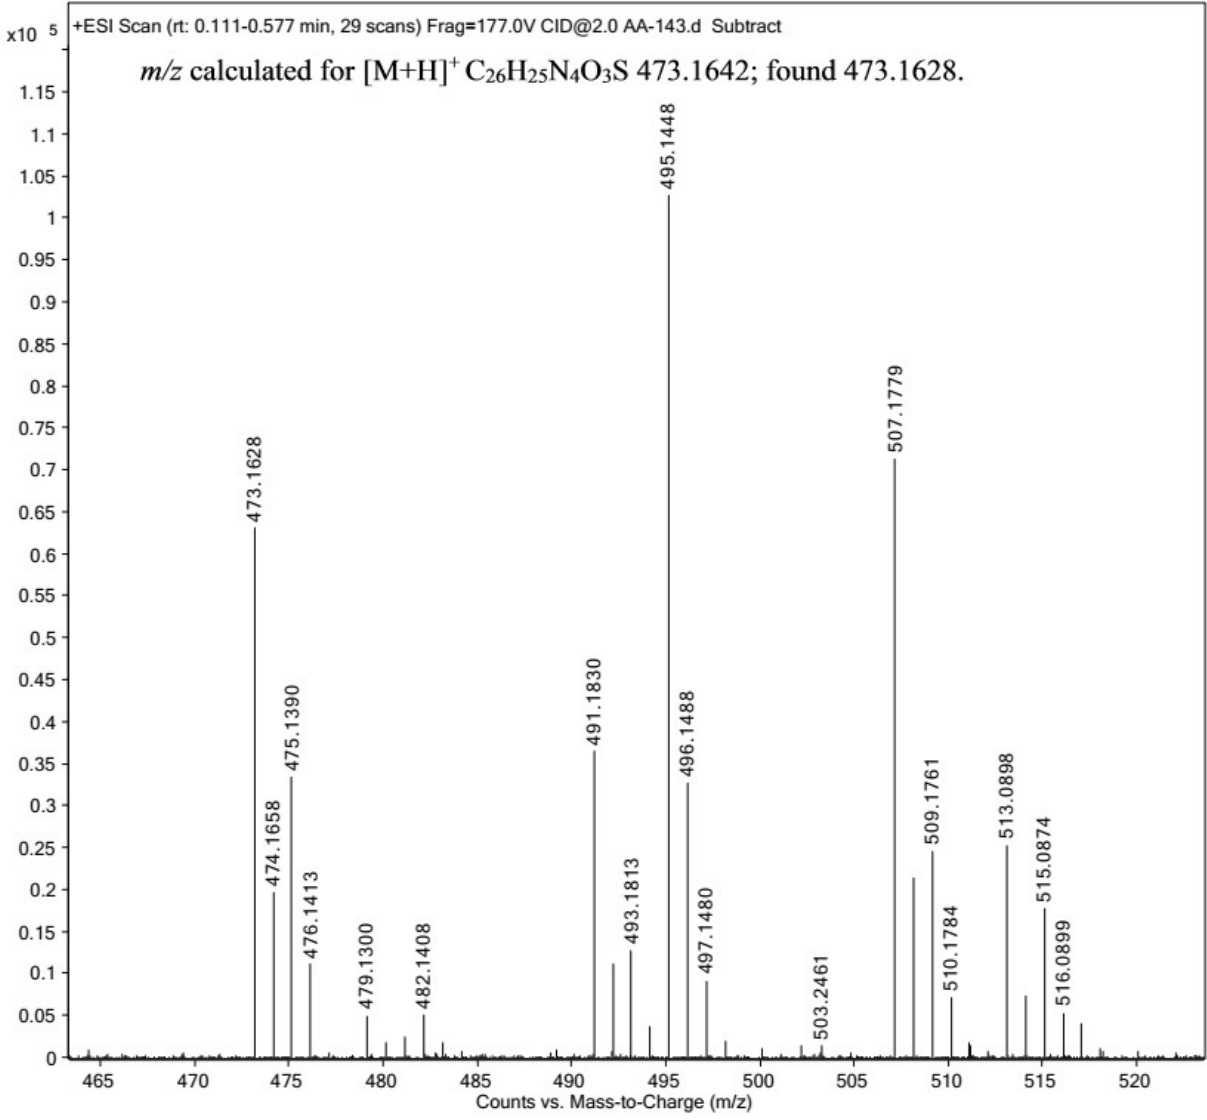

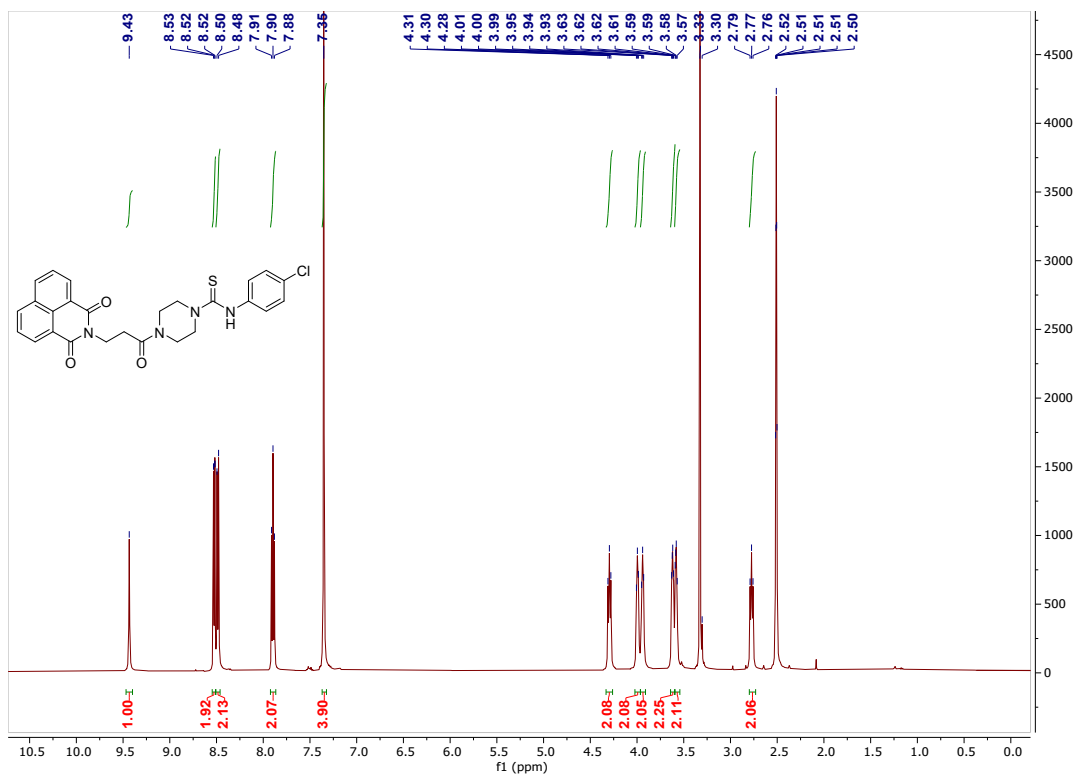

$^1\text{H}$  spectrum for compound 9h (500 MHz:  $\text{DMSO-}d_6$ )

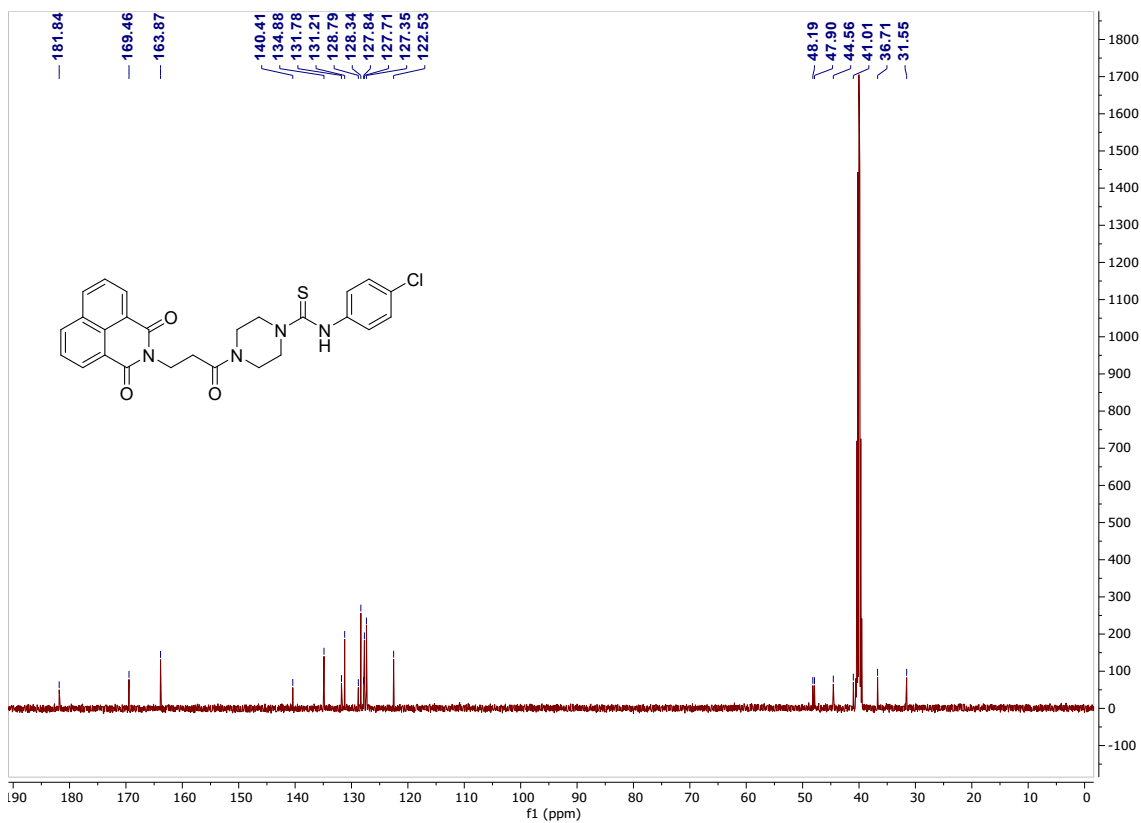

$^{13}\text{C}$  spectrum for compound 9h (125 MHz:  $\text{DMSO-}d_6$ )

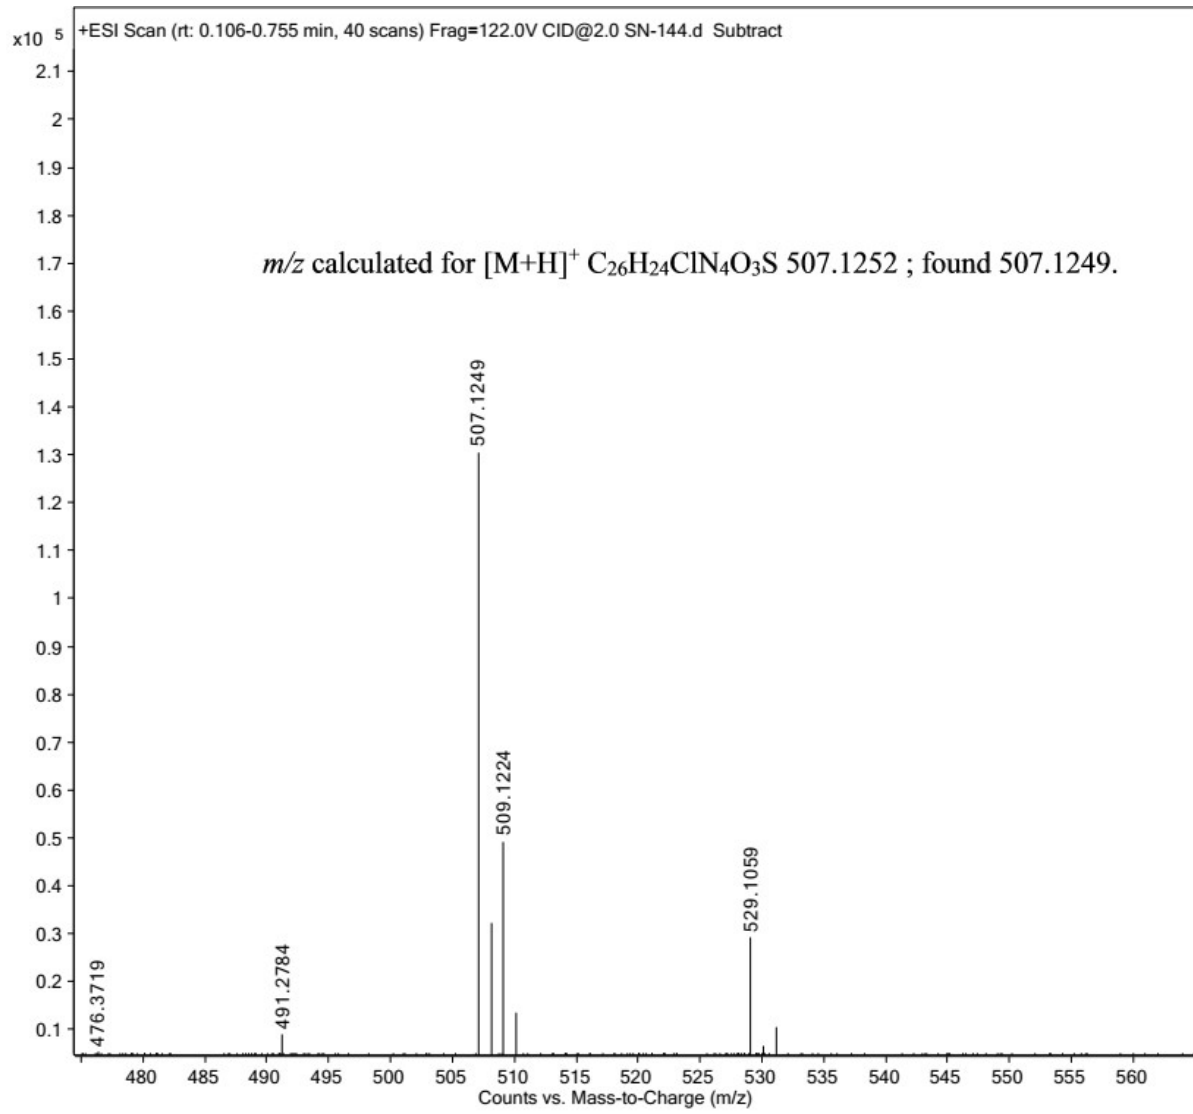



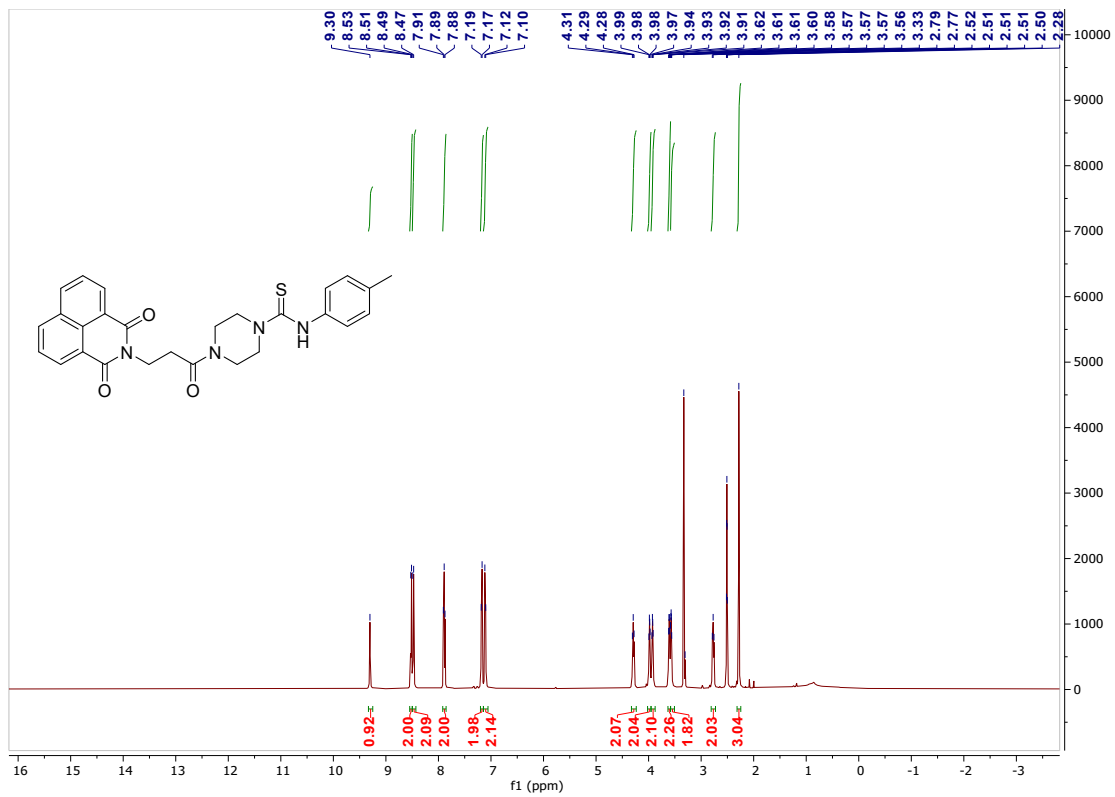

**<sup>1</sup>H spectrum for compound 9i (500 MHz: DMSO-*d*<sub>6</sub>)**

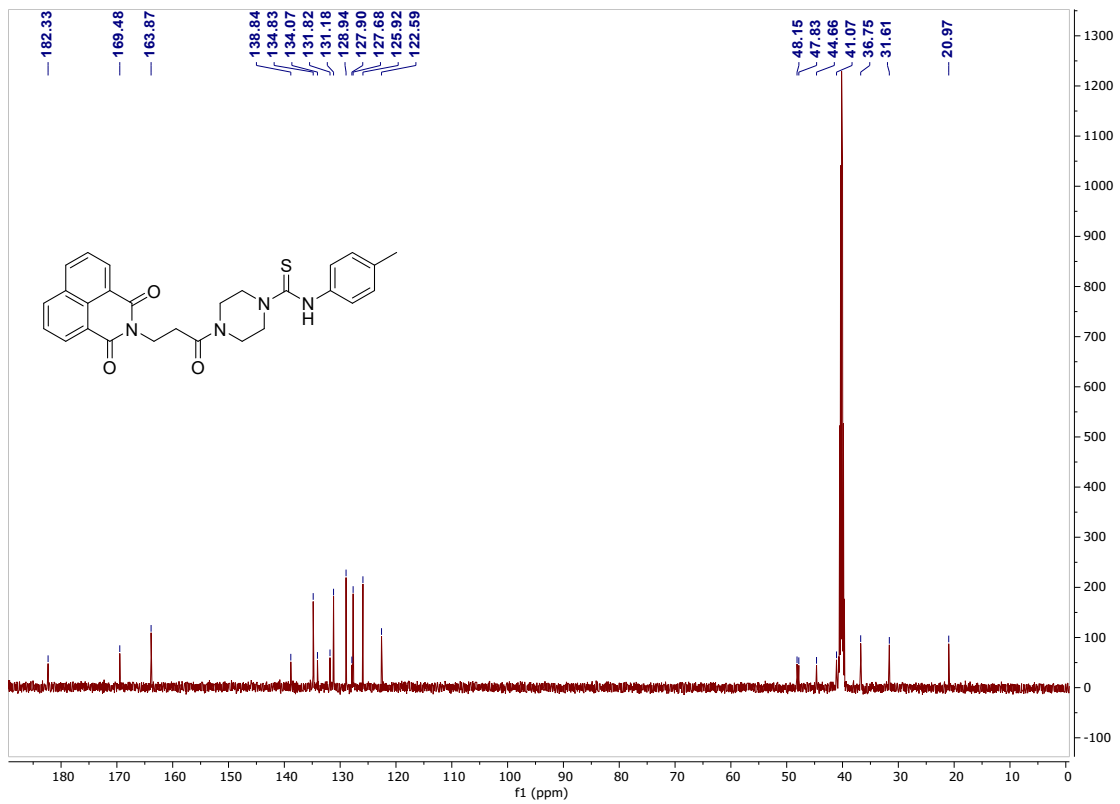

**<sup>13</sup>C spectrum for compound 9i (125 MHz: DMSO-*d*<sub>6</sub>)**

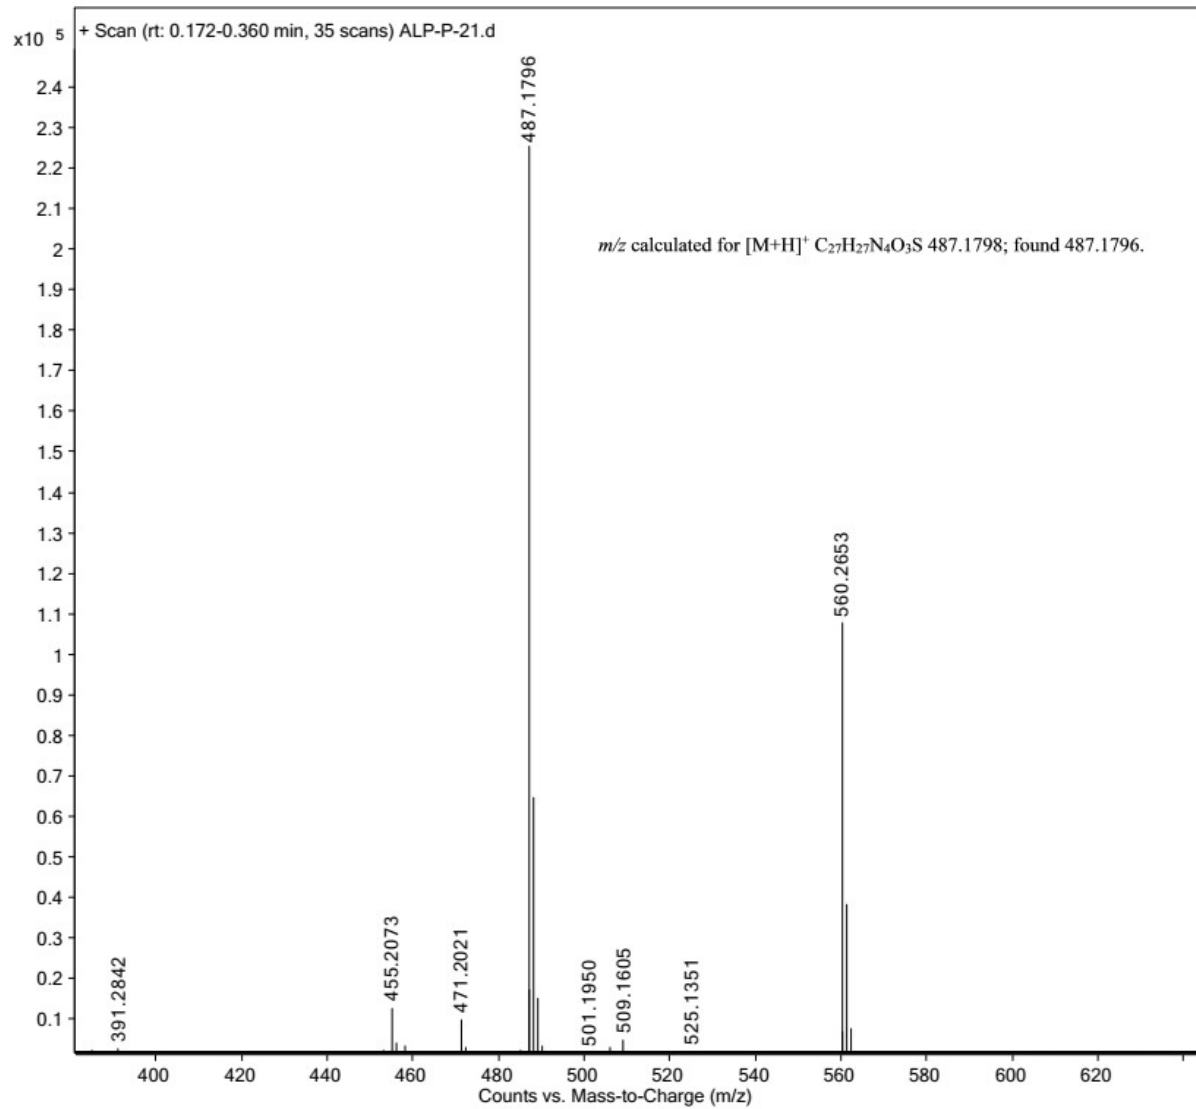

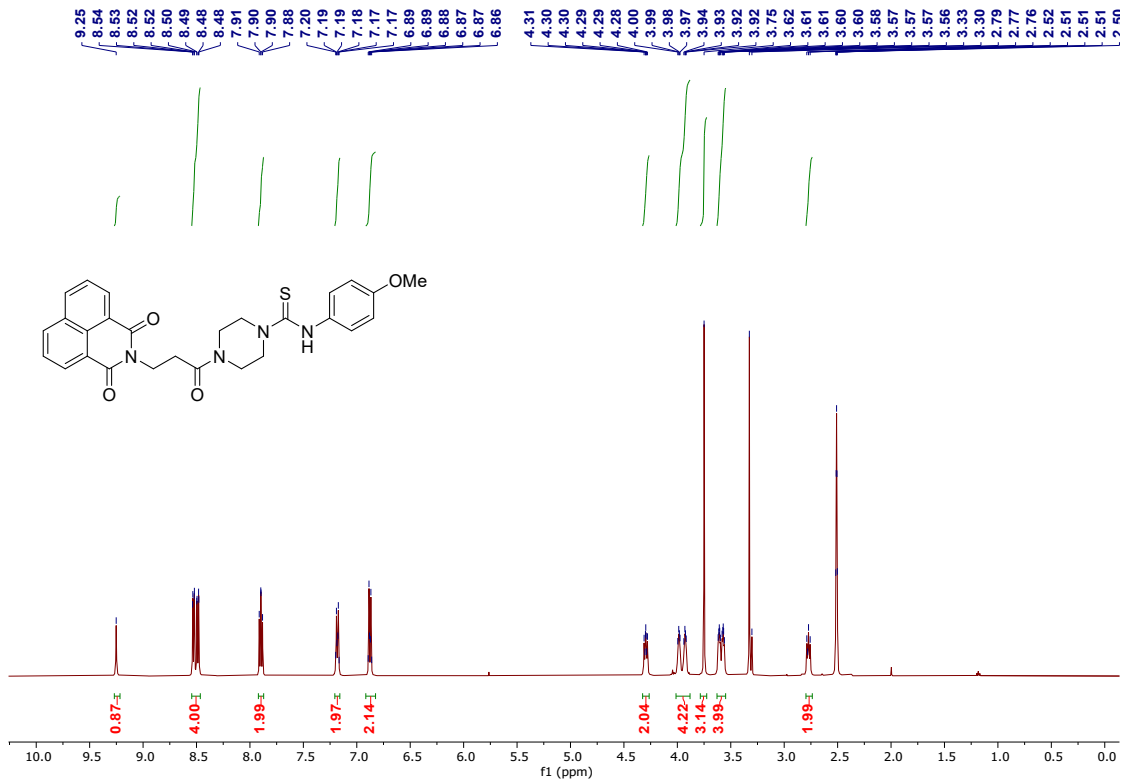

<sup>1</sup>H spectrum for compound 9j (500 MHz: DMSO-*d*<sub>6</sub>)

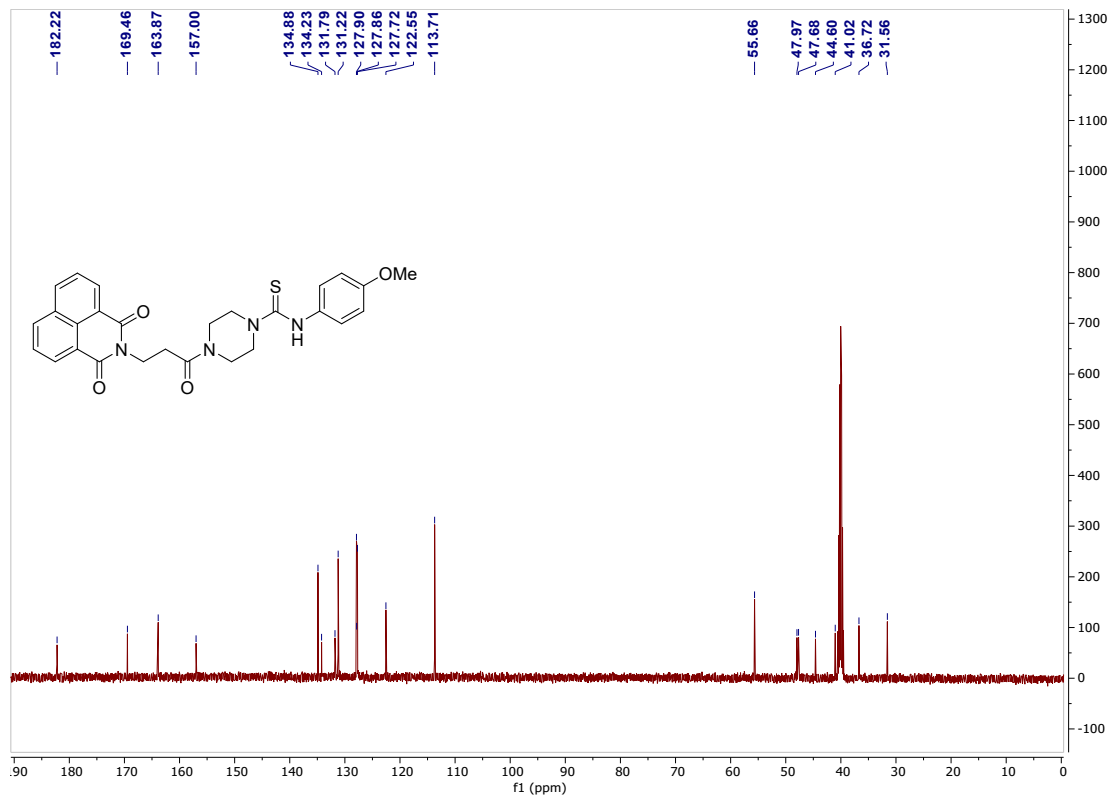

<sup>13</sup>C spectrum for compound 9j (125 MHz: DMSO-*d*<sub>6</sub>)

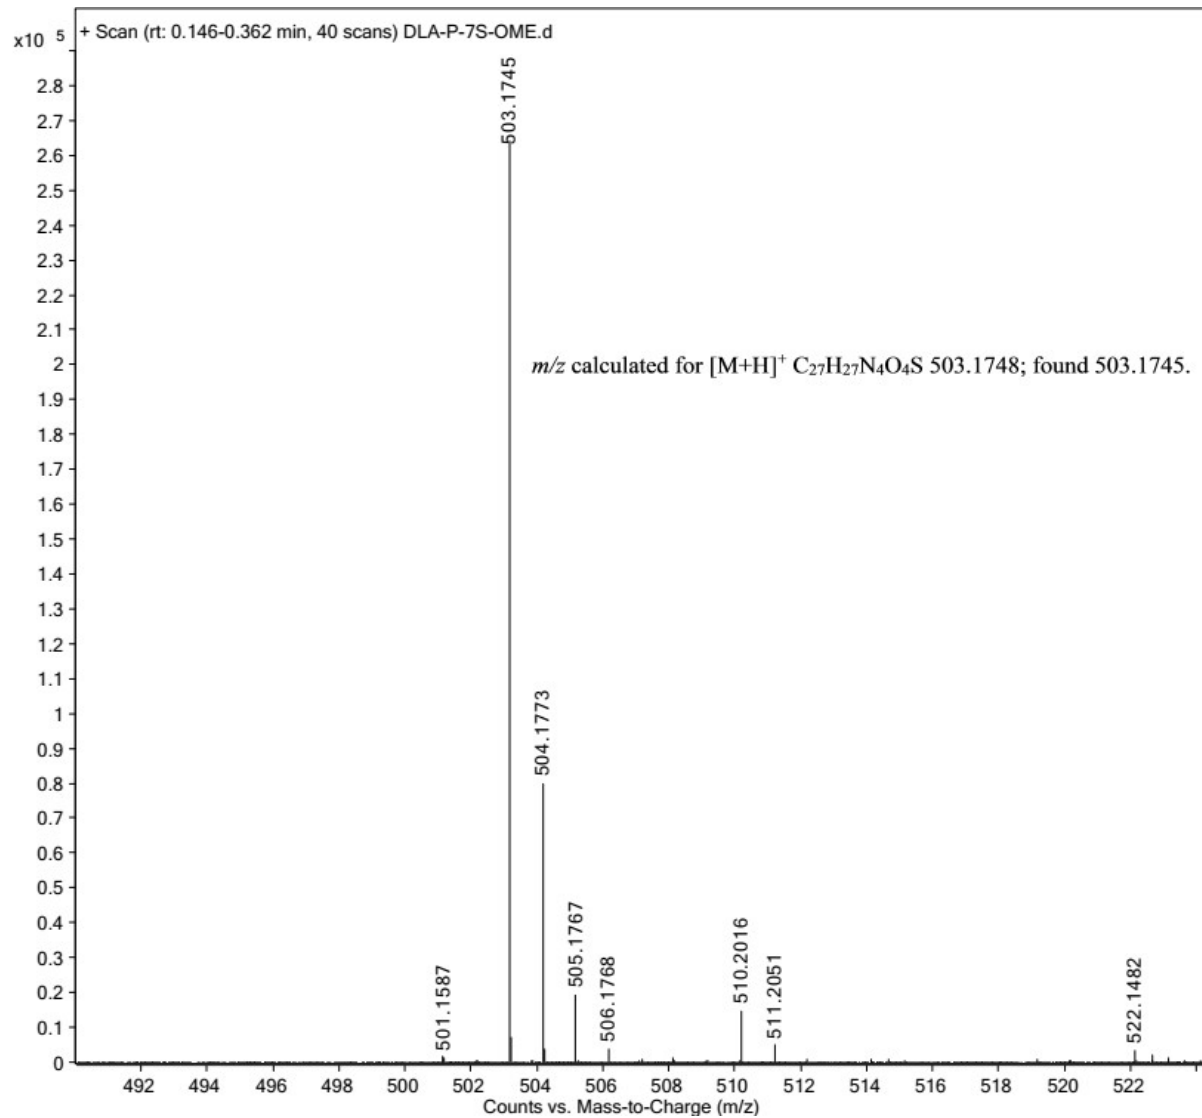

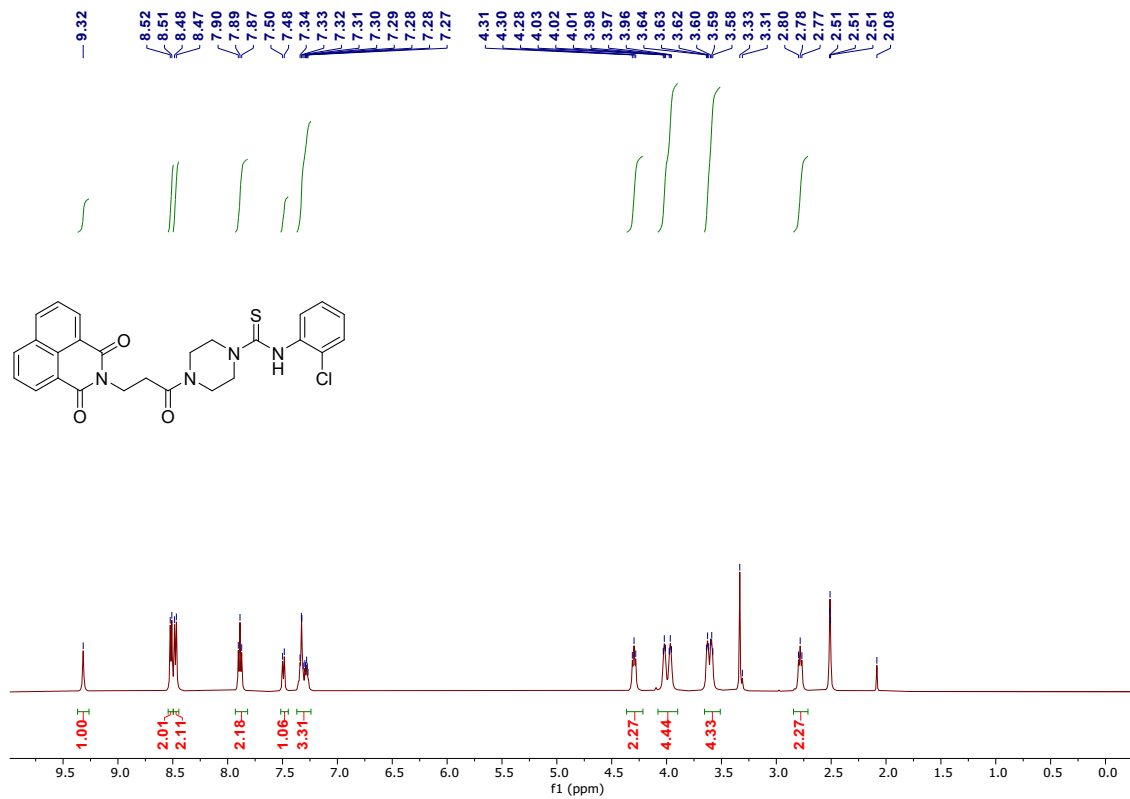

<sup>1</sup>H spectrum for compound **9k** (500 MHz: DMSO-*d*<sub>6</sub>)

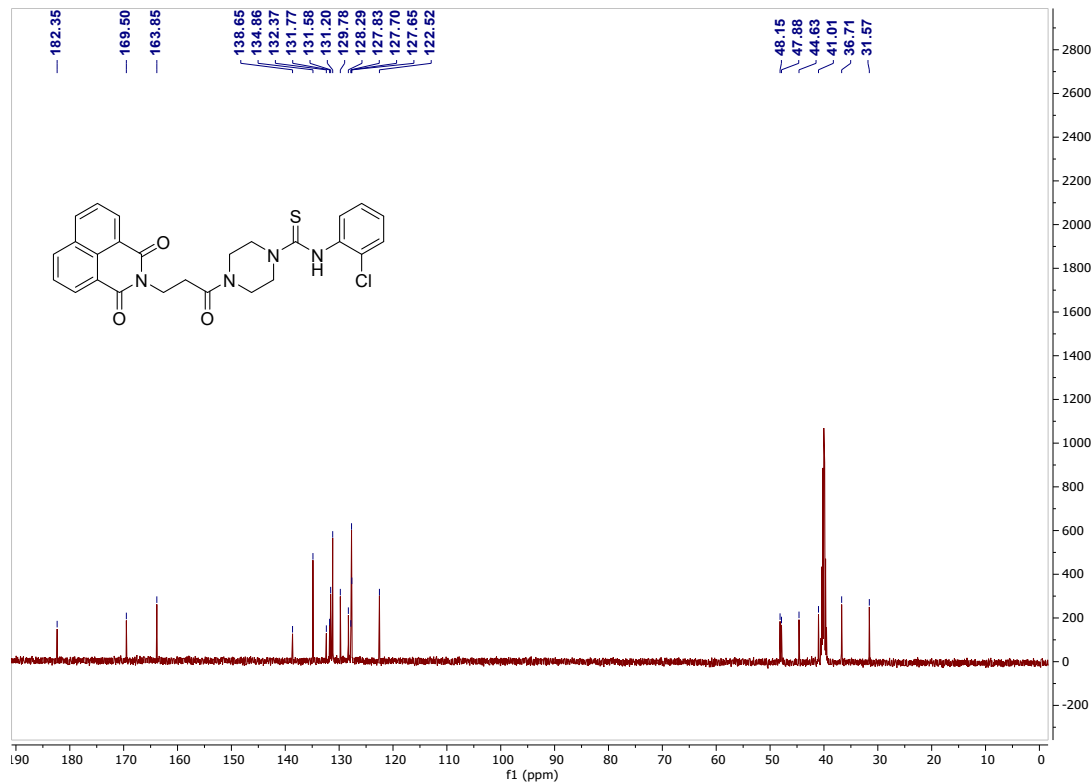

<sup>13</sup>C spectrum for compound **9k** (125 MHz: DMSO-*d*<sub>6</sub>)

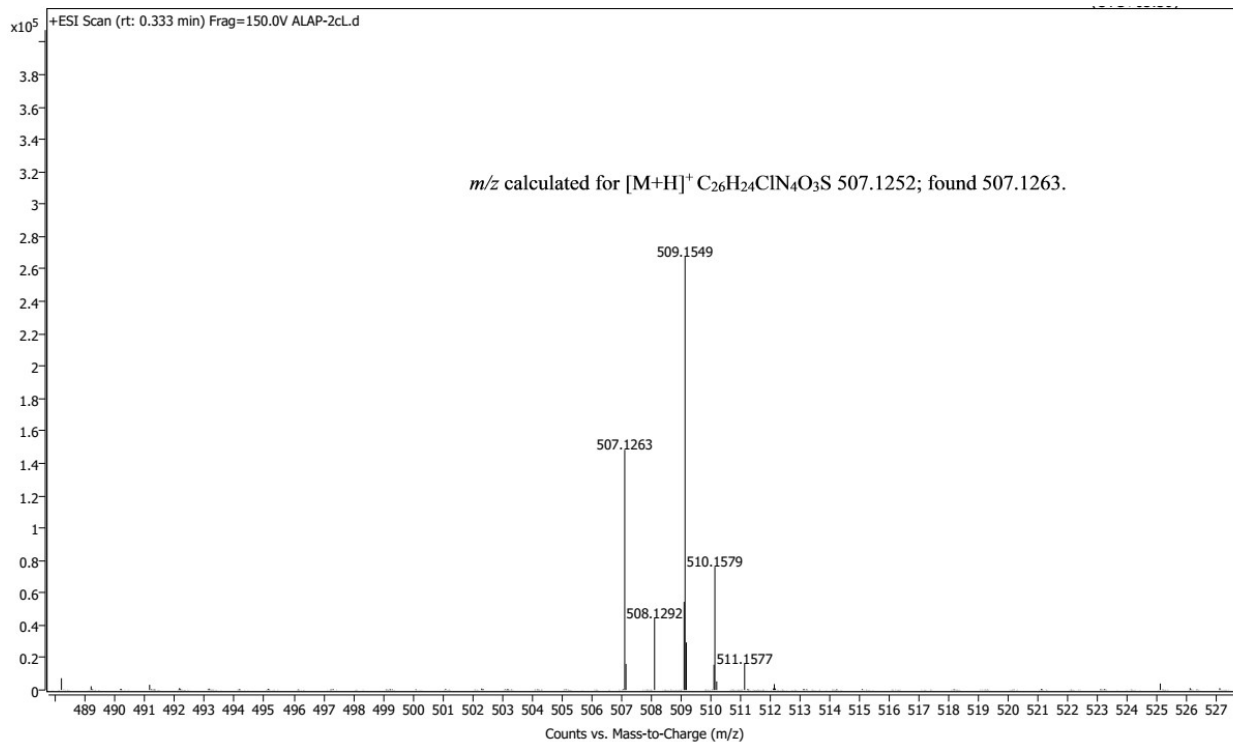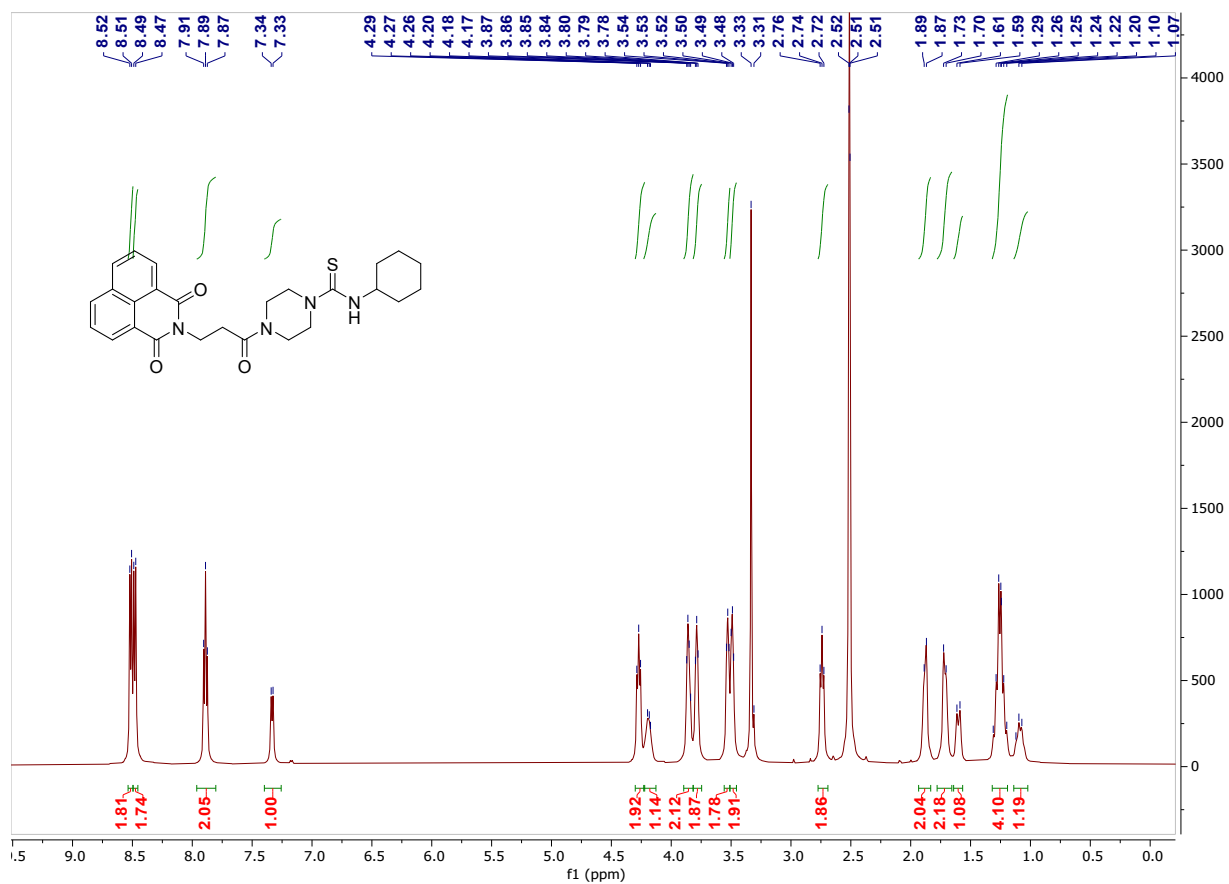

<sup>1</sup>H spectrum for compound **9l** (500 MHz: DMSO-*d*<sub>6</sub>)

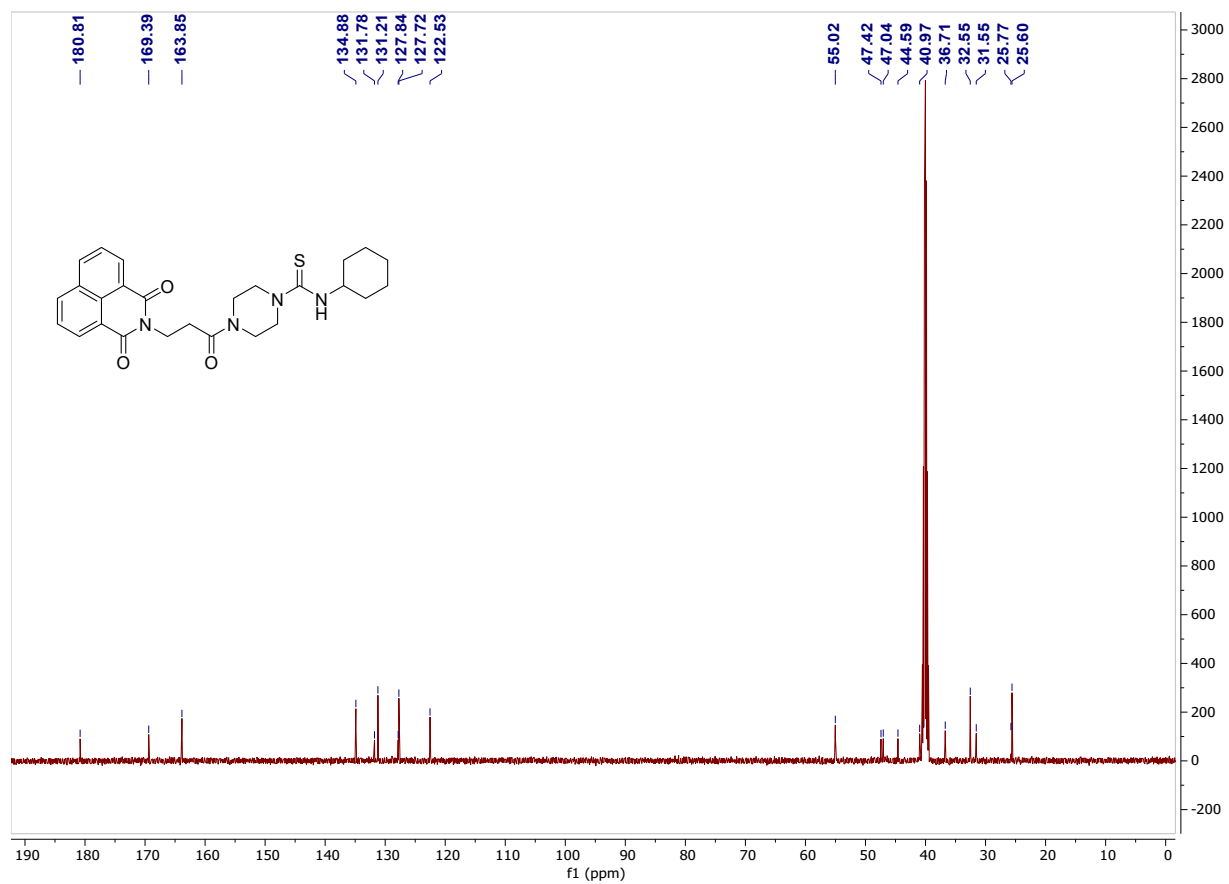

$^{13}\text{C}$  spectrum for compound 9I (500 MHz:  $\text{DMSO-}d_6$ )

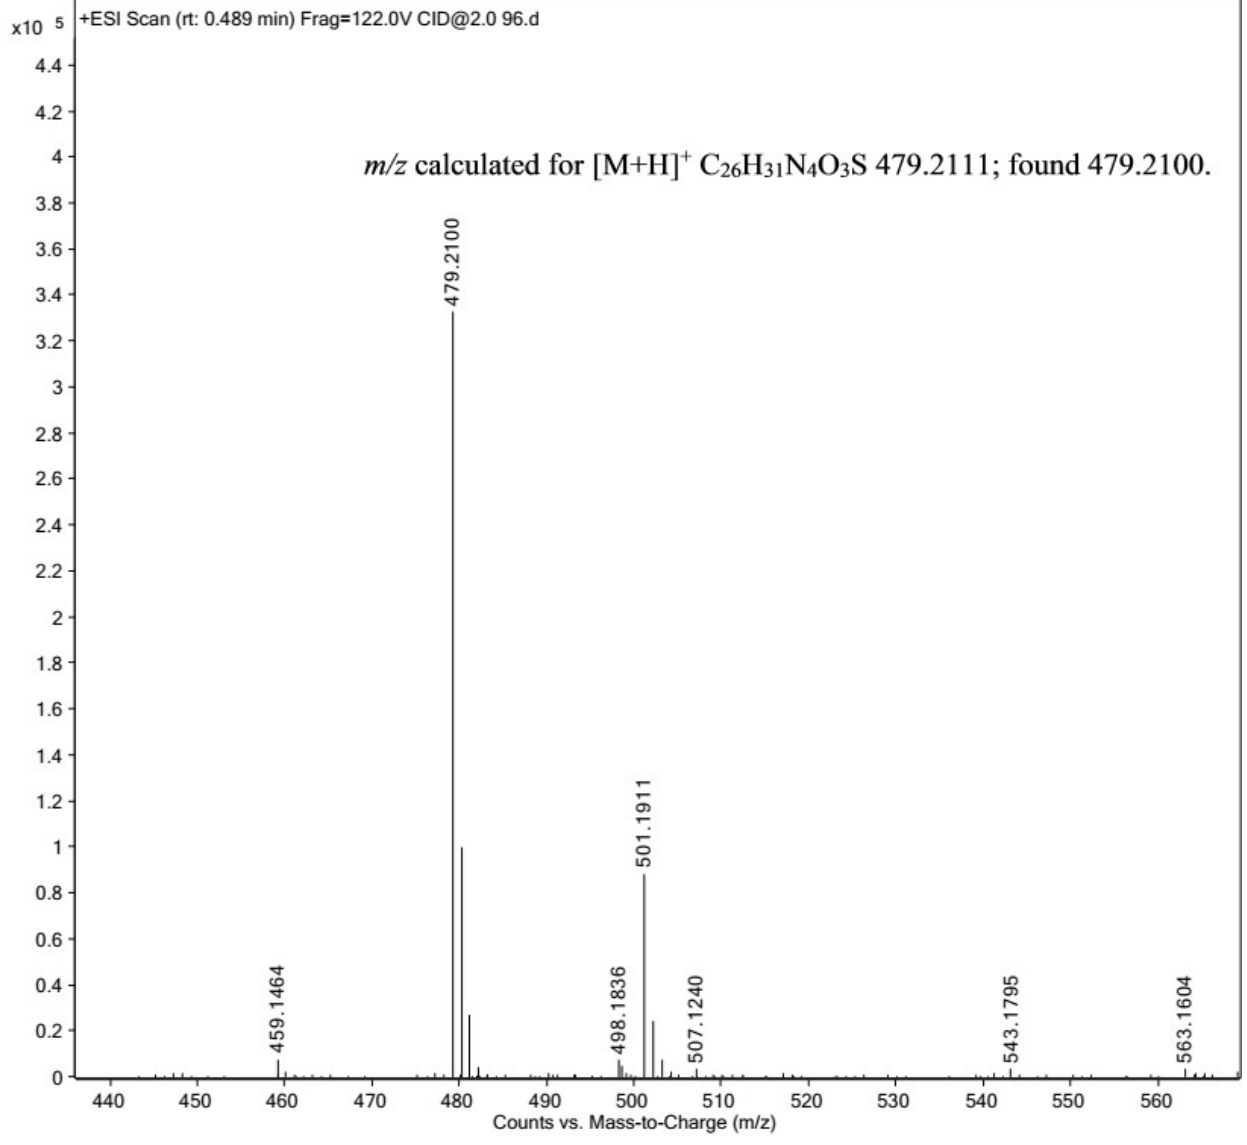



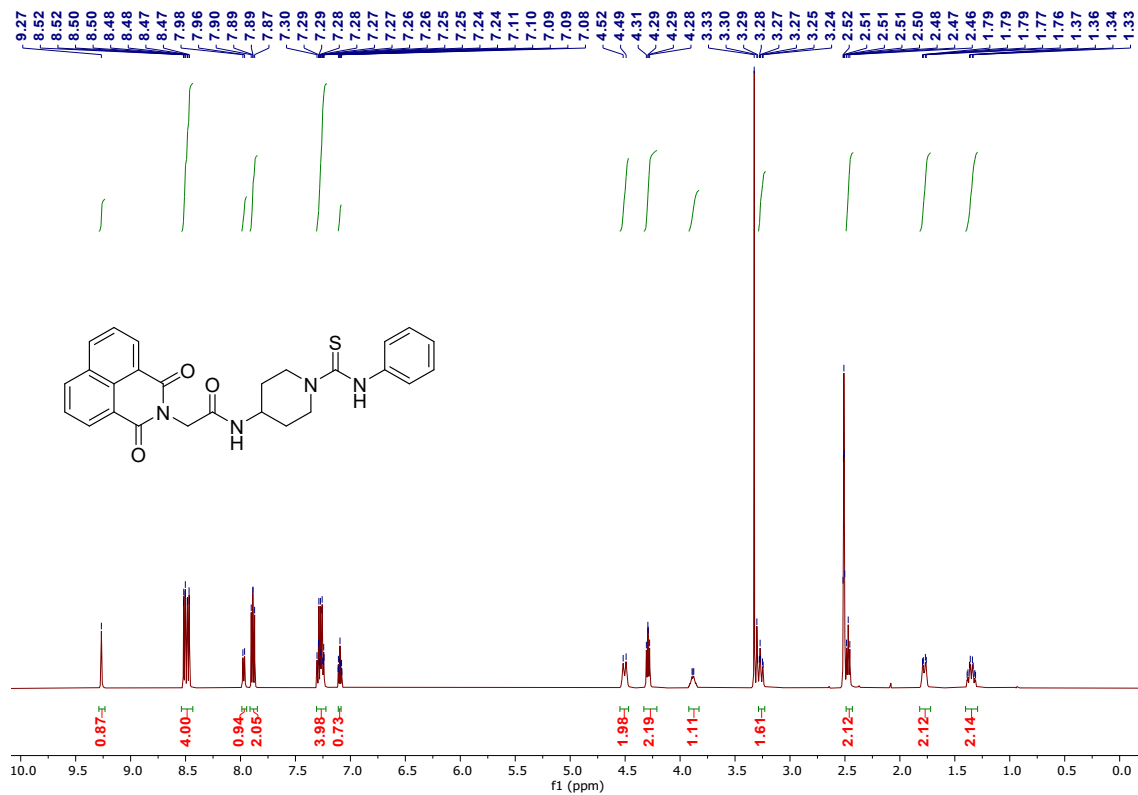

<sup>1</sup>H spectrum for compound **13a** (500 MHz: DMSO-*d*<sub>6</sub>)

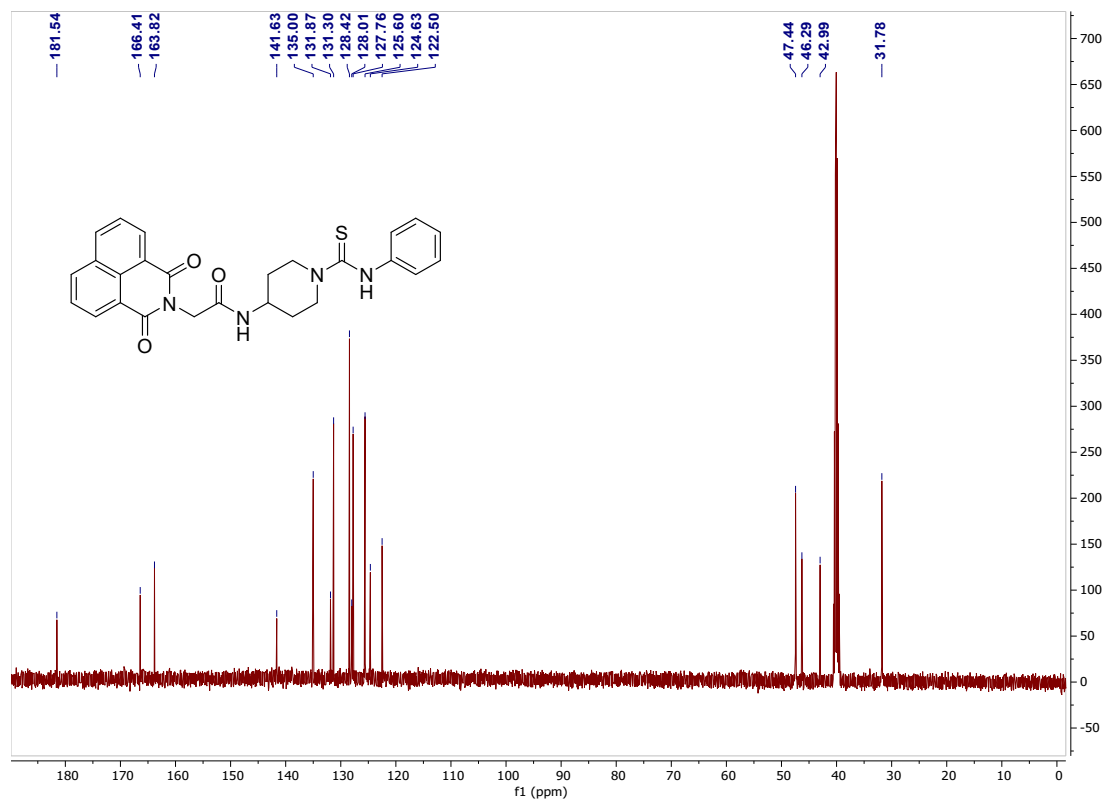

<sup>13</sup>C spectrum for compound **13a** (125 MHz: DMSO-*d*<sub>6</sub>)

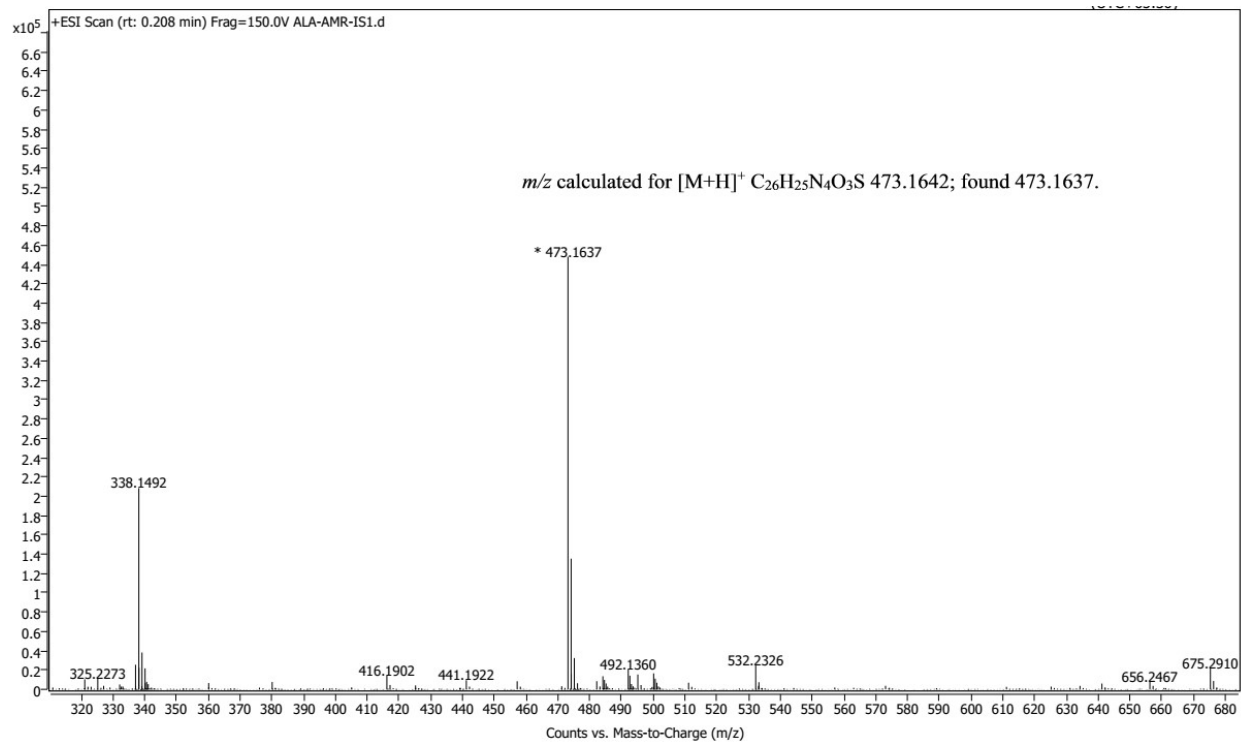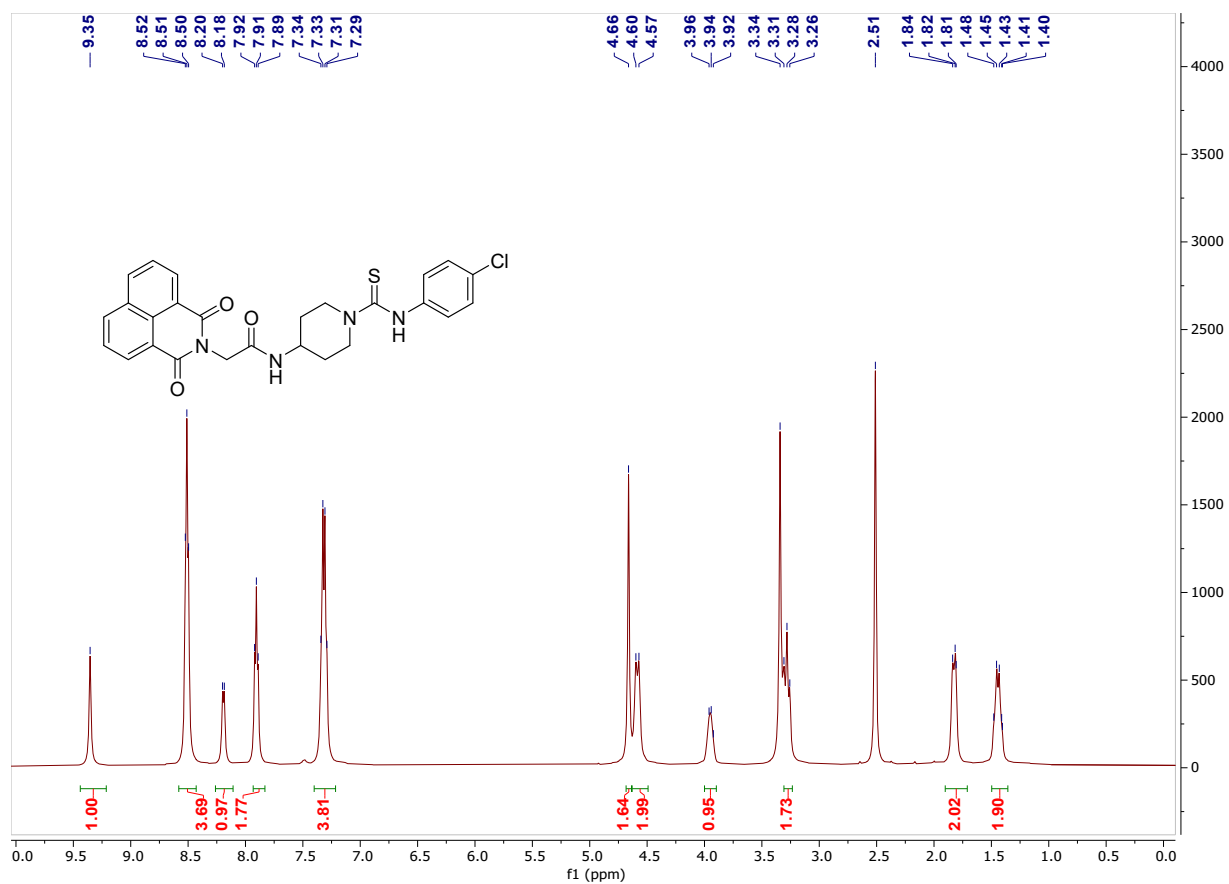

$^1H$  spectrum for compound **13b** (500 MHz: DMSO- $d_6$ )

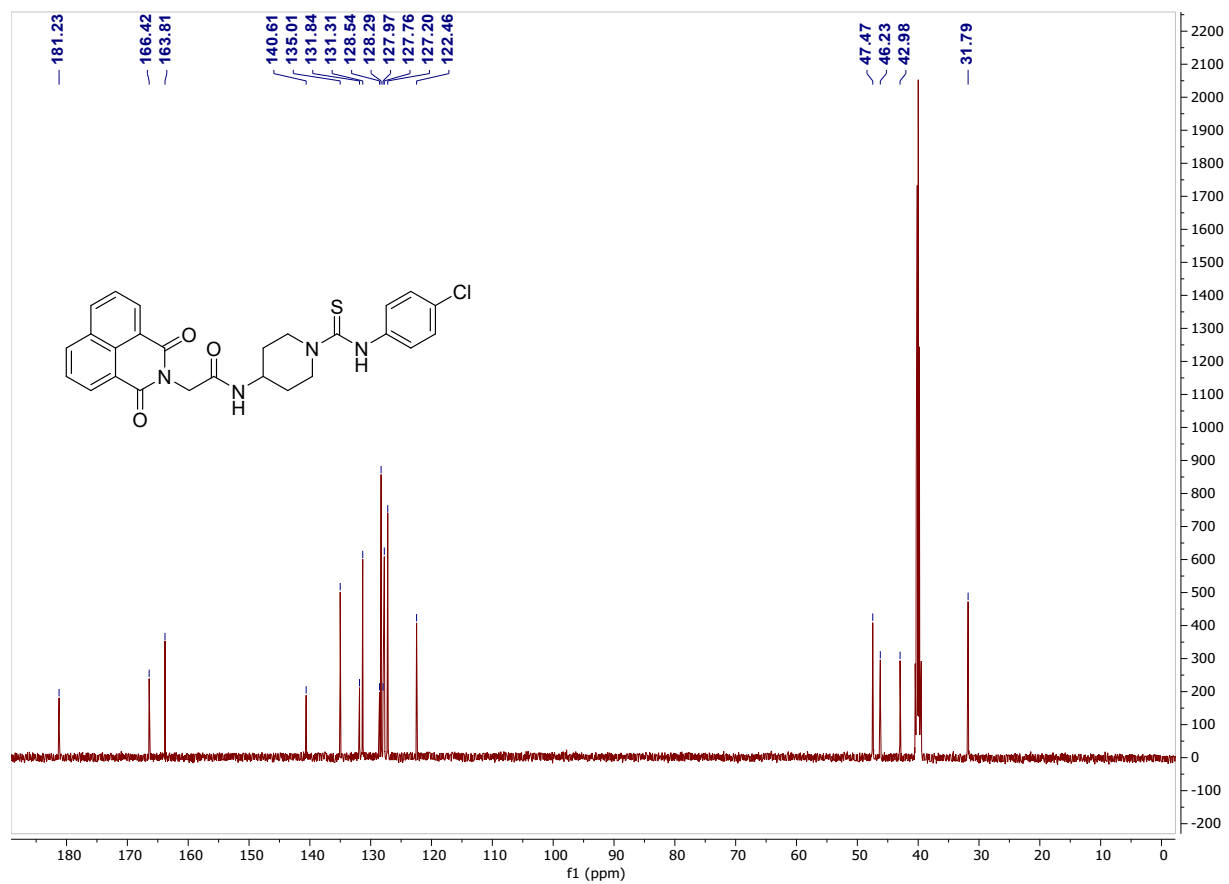

$^{13}\text{C}$  spectrum for compound **13b** (125 MHz:  $\text{DMSO-}d_6$ )

x10 5

+ Scan (rt: 0.115-0.319 min, 4 scans) PMN-IS-3CL.d

$m/z$  calculated for  $[M+H]^+$  C<sub>26</sub>H<sub>24</sub>ClN<sub>4</sub>O<sub>3</sub>S 507.1252; found 507.1241.

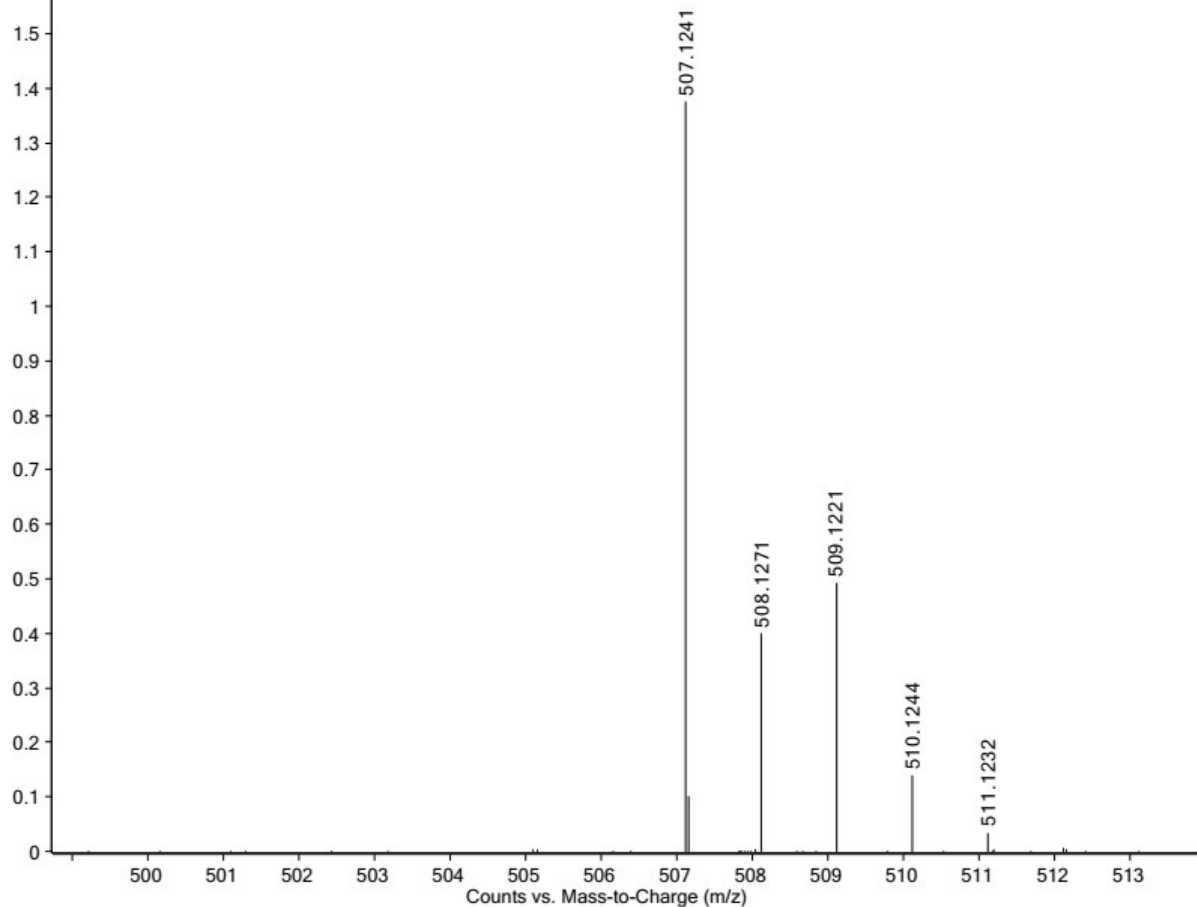

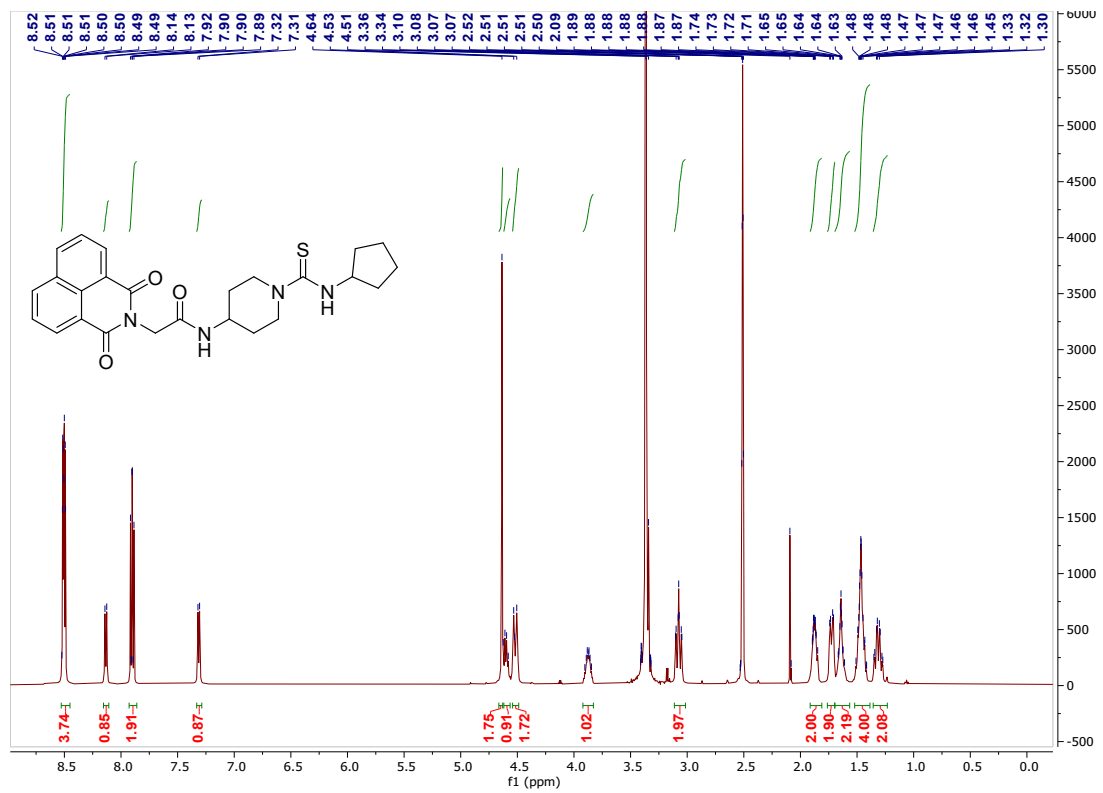

**<sup>1</sup>H spectrum for compound 13c (500 MHz: DMSO-d<sub>6</sub>)**

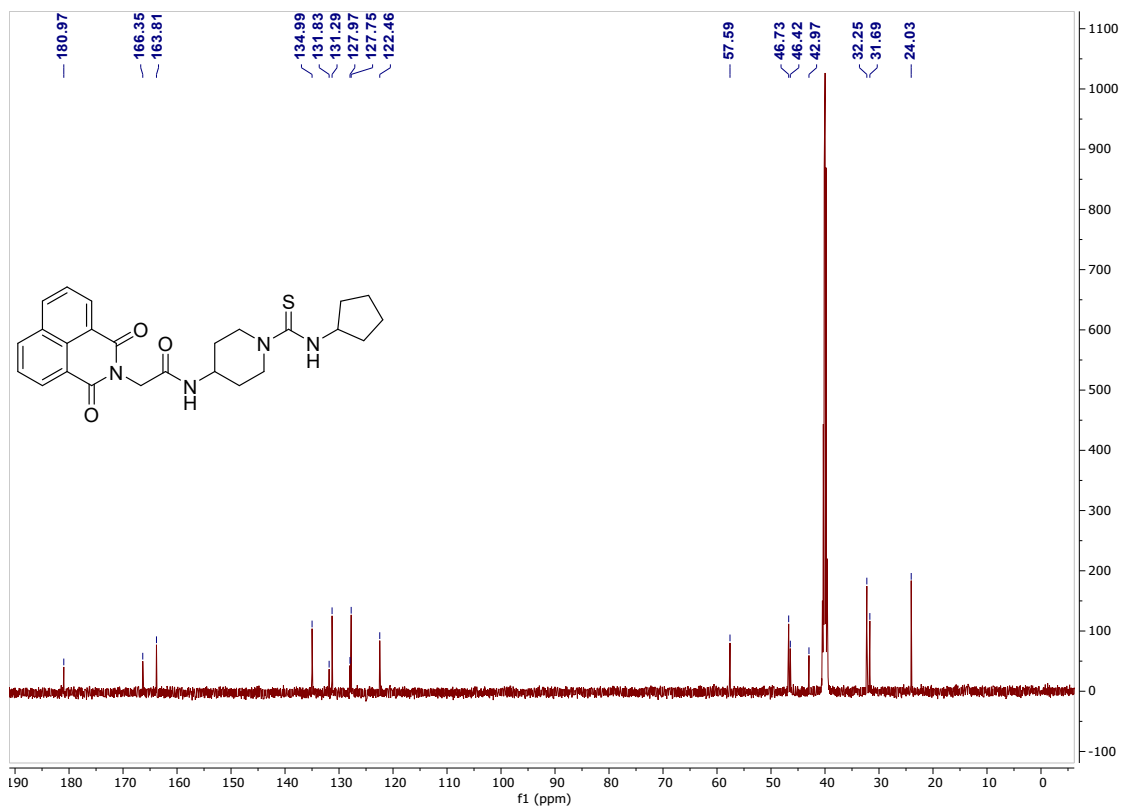

**<sup>13</sup>C spectrum for compound 13c (125 MHz: DMSO-d<sub>6</sub>)**

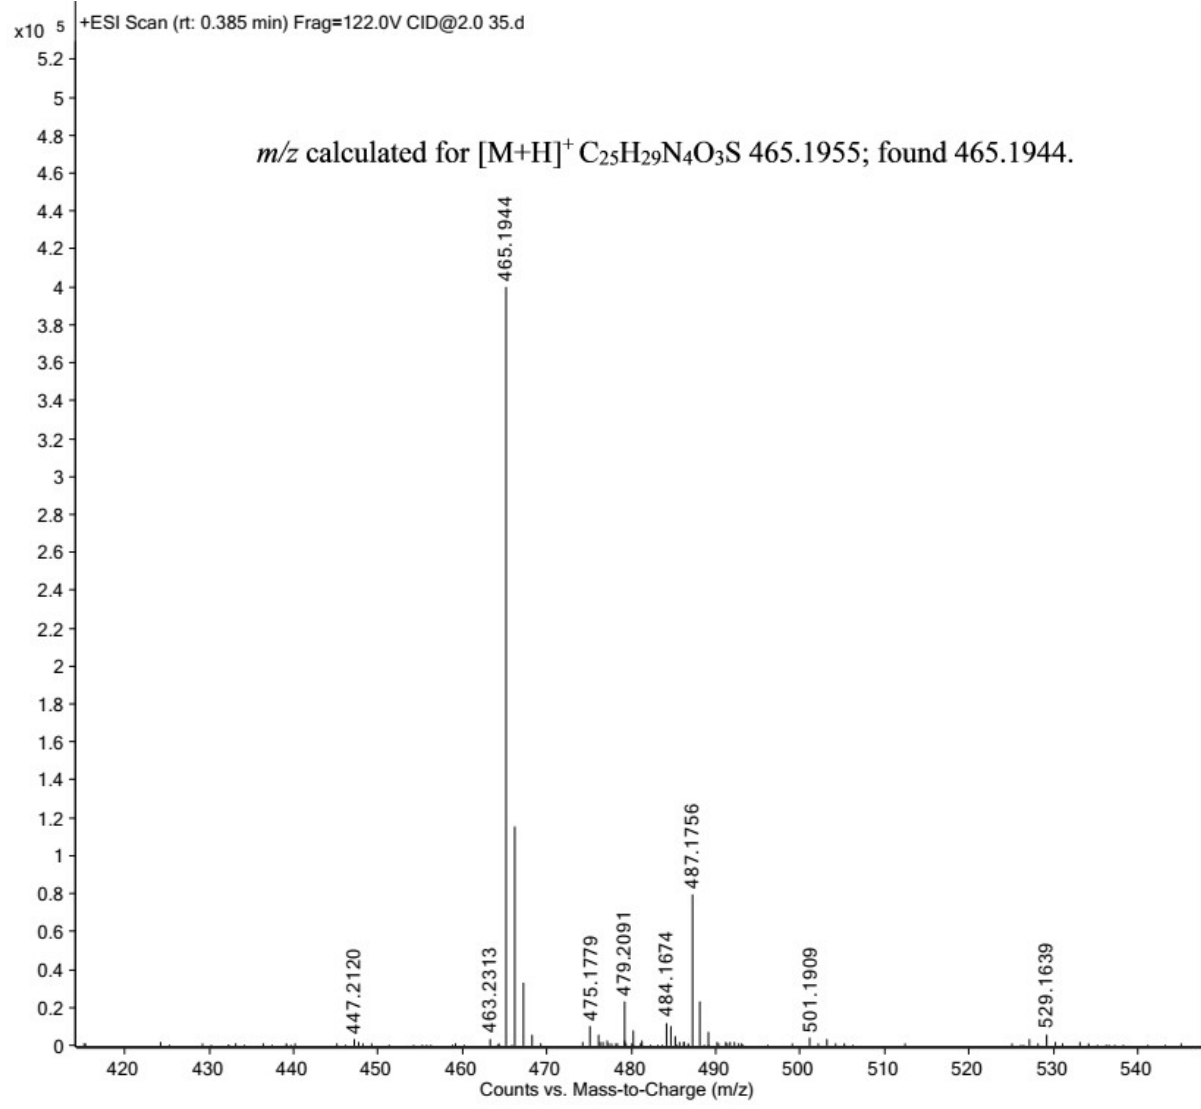

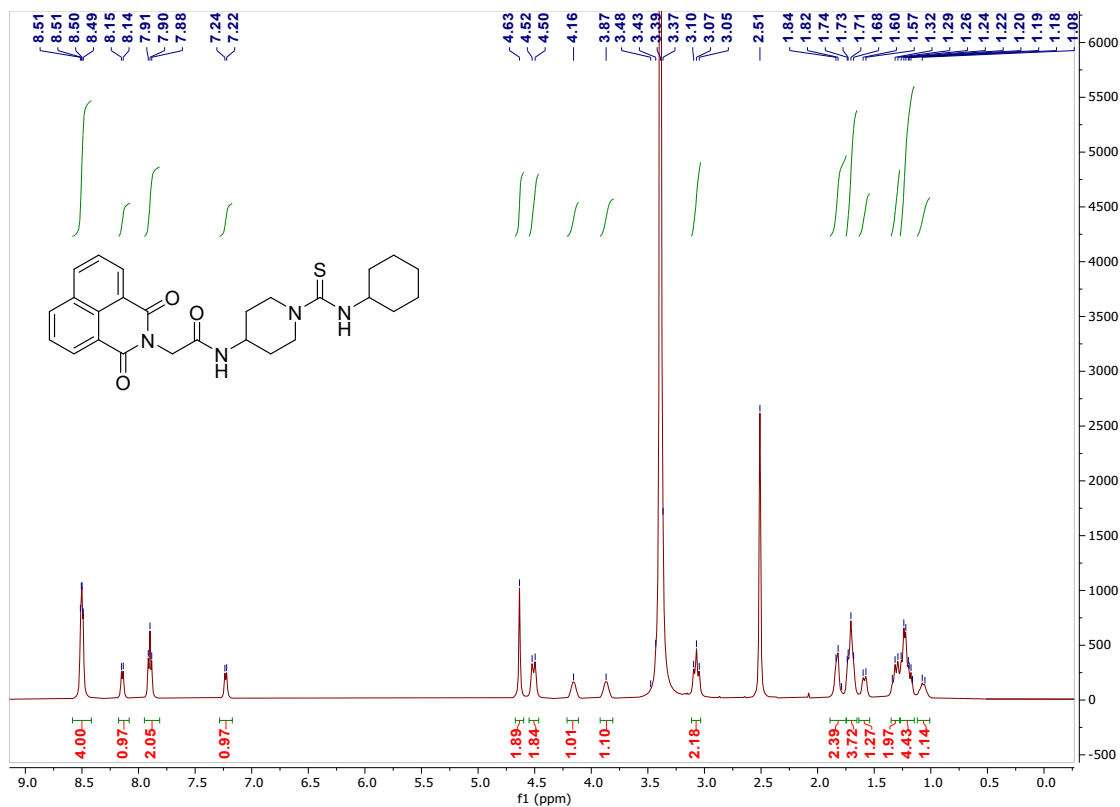

**<sup>1</sup>H spectrum for compound 13d (500 MHz: DMSO-*d*<sub>6</sub>)**

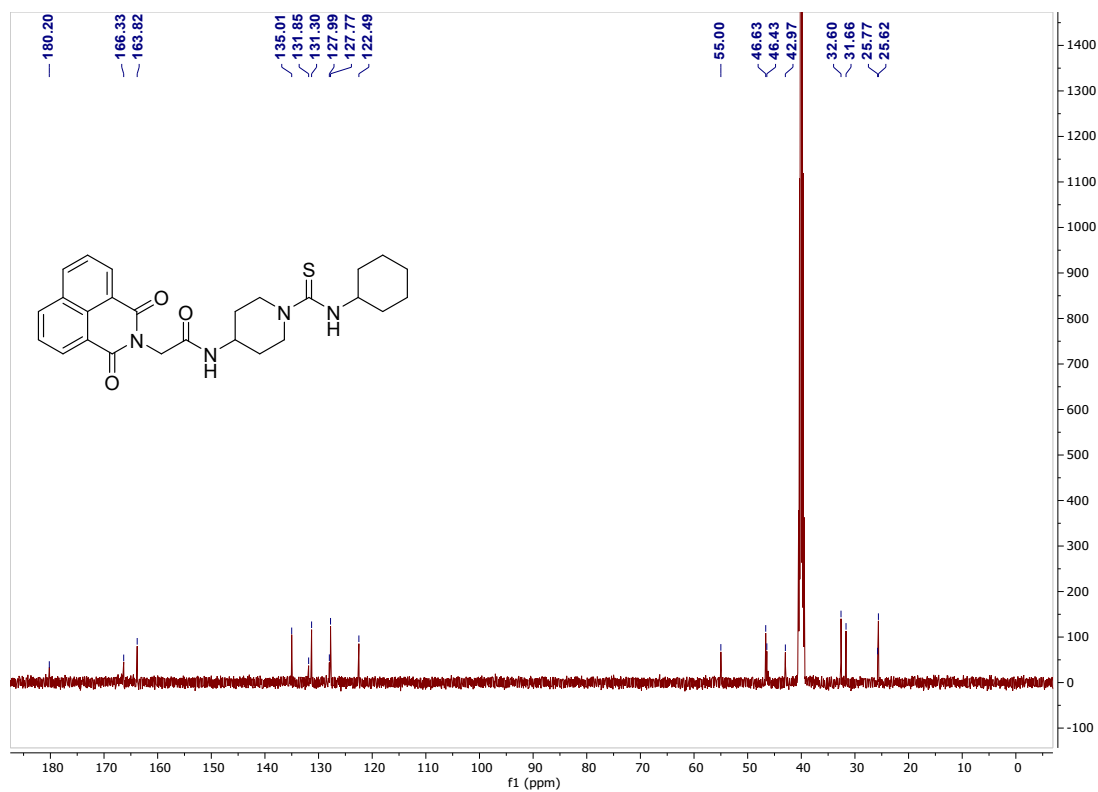

**<sup>13</sup>C spectrum for compound 13d (125 MHz: DMSO-*d*<sub>6</sub>)**

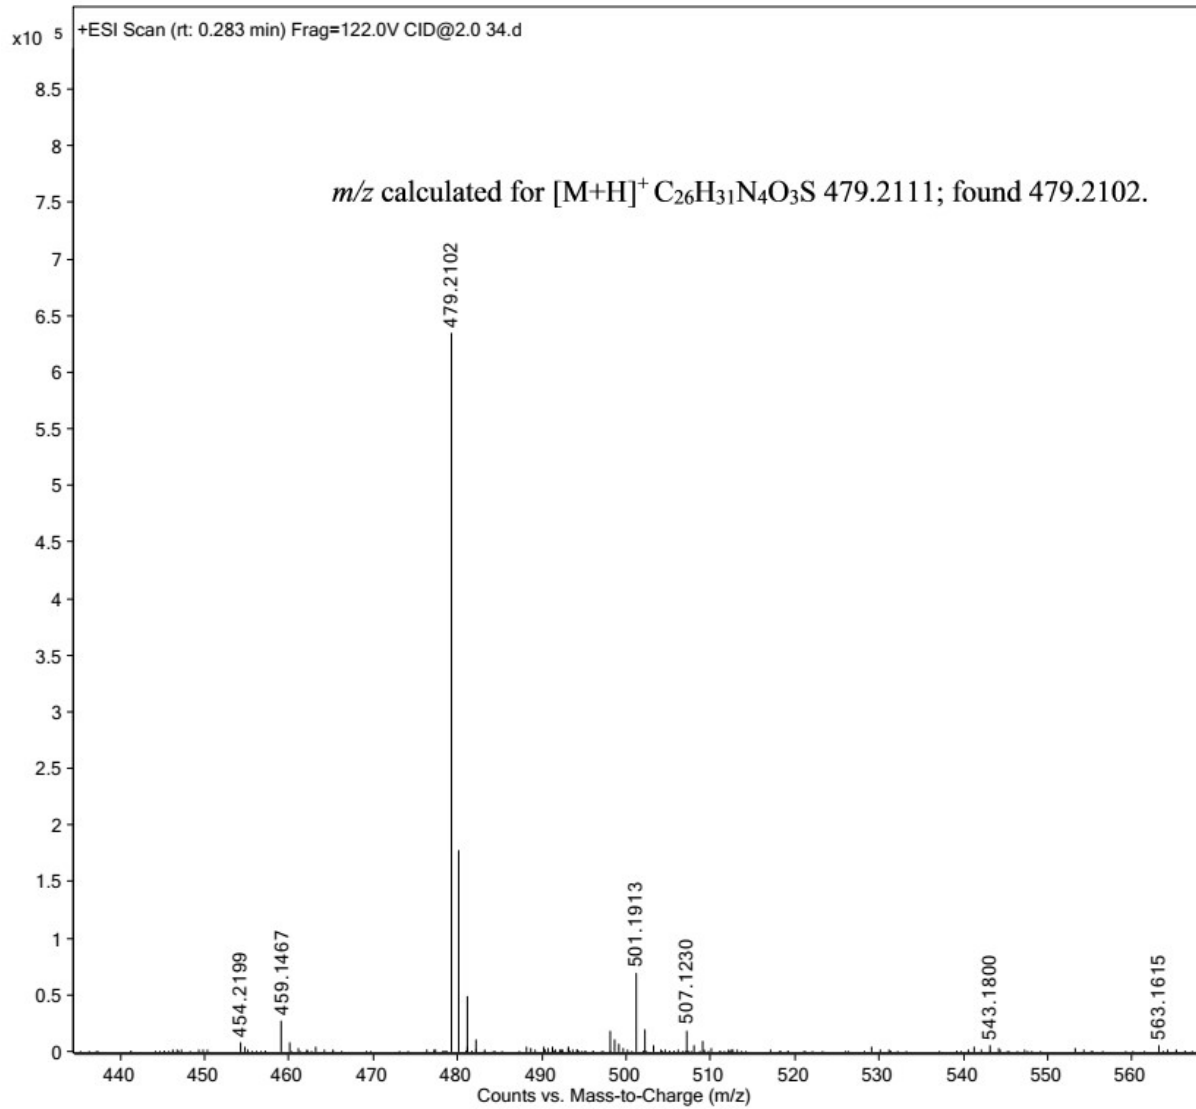



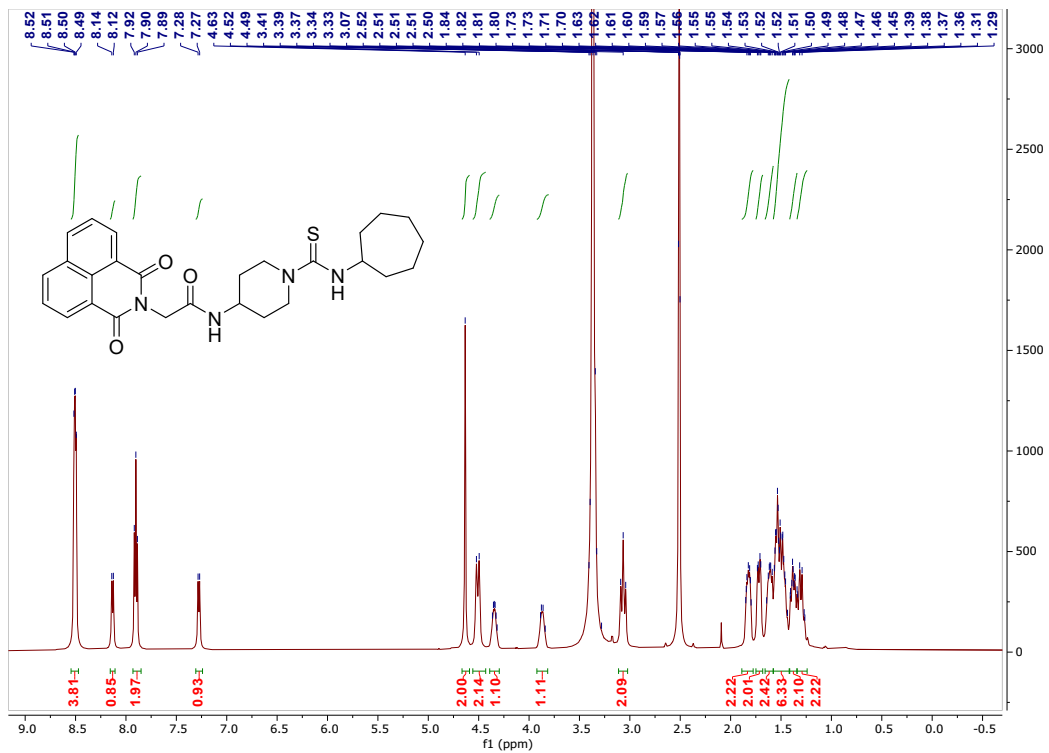

**<sup>1</sup>H NMR spectrum for compound 13e (500 MHz: DMSO-d<sub>6</sub>)**

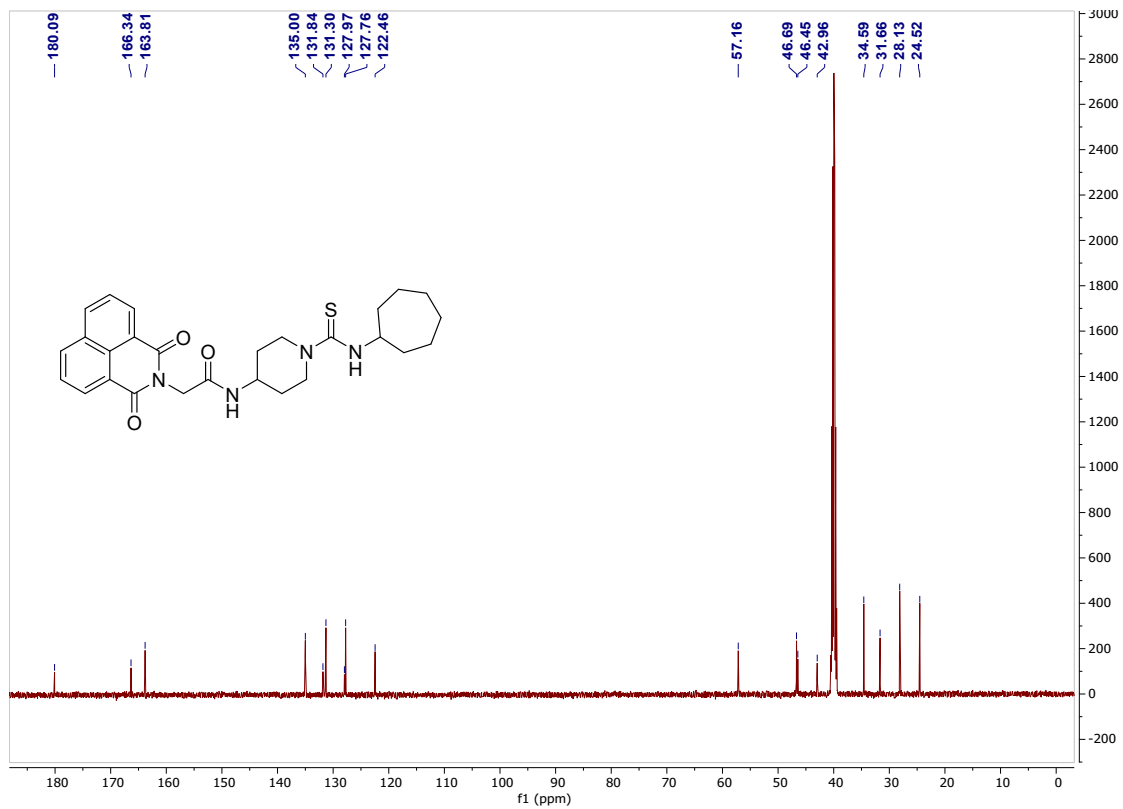

**<sup>13</sup>C NMR spectrum for compound 13e (125 MHz: DMSO-d<sub>6</sub>)**

x10 5

+ESI Scan (rt: 0.465 min) Frag=122.0V CID@2.0 36.d

$m/z$  calculated for  $[M+H]^+$   $C_{27}H_{33}N_4O_3S$  493.2268; found 493.2252.

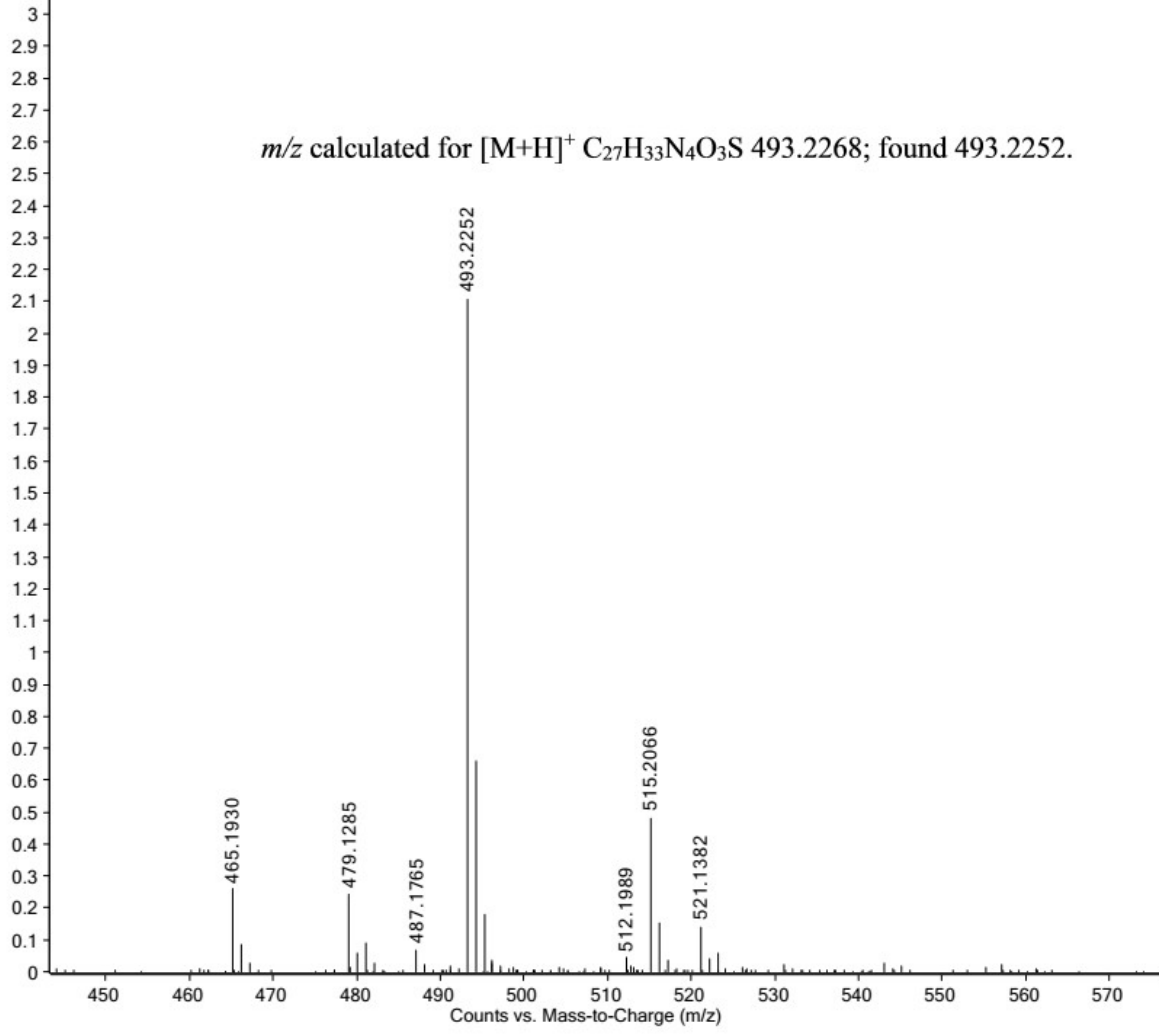

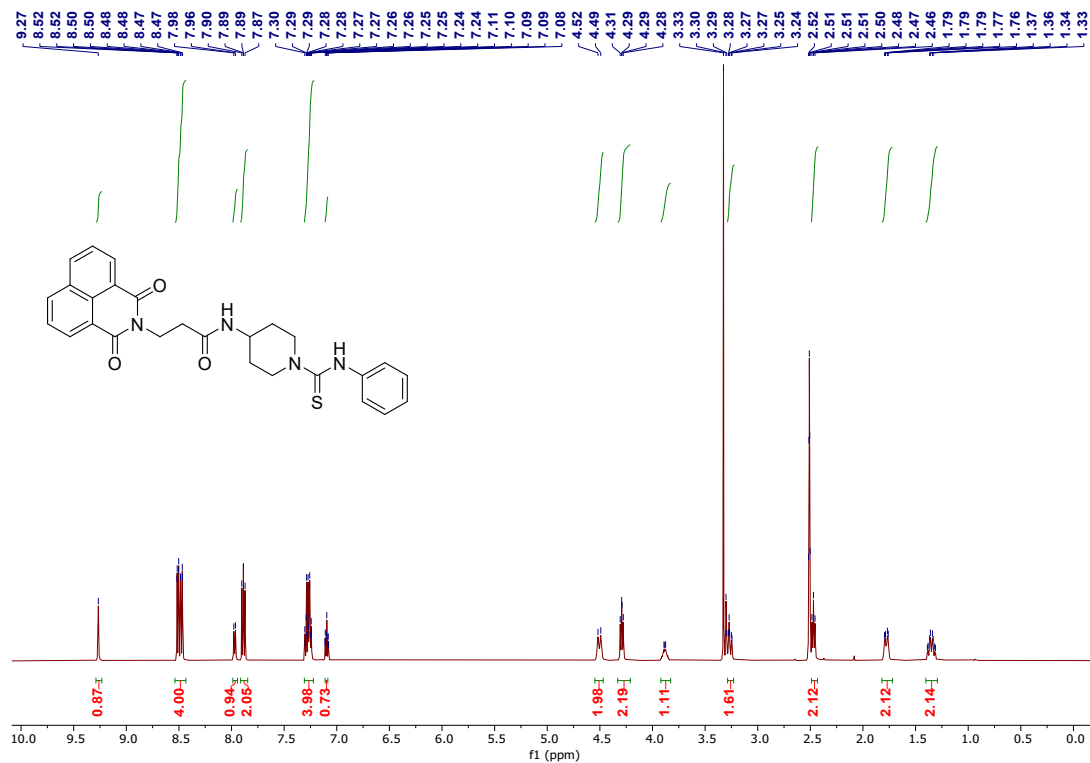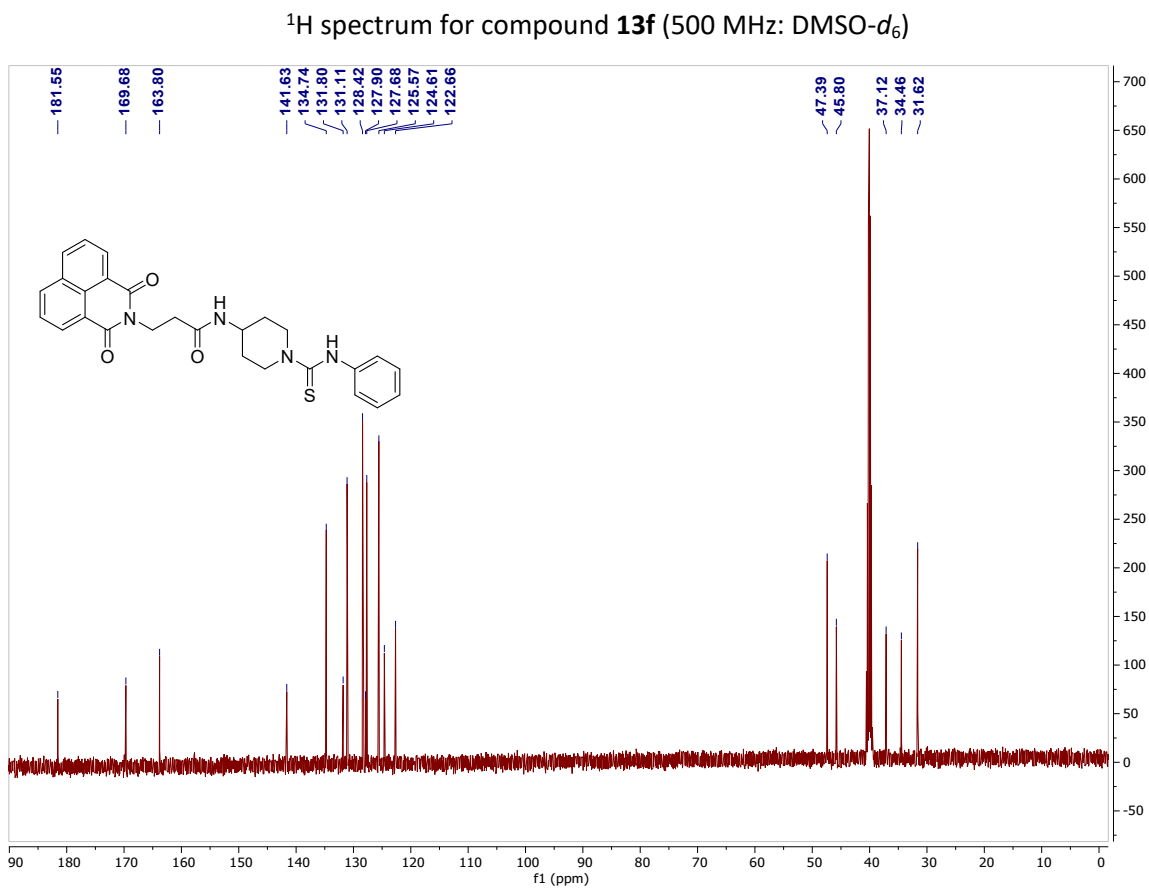

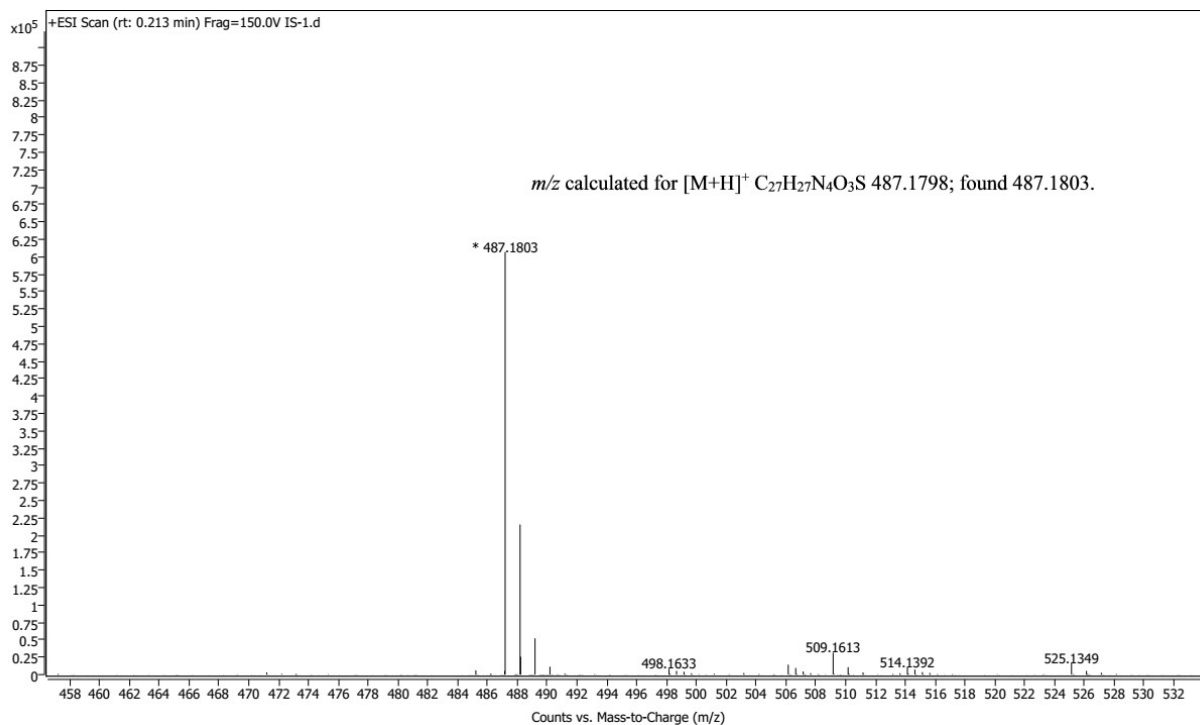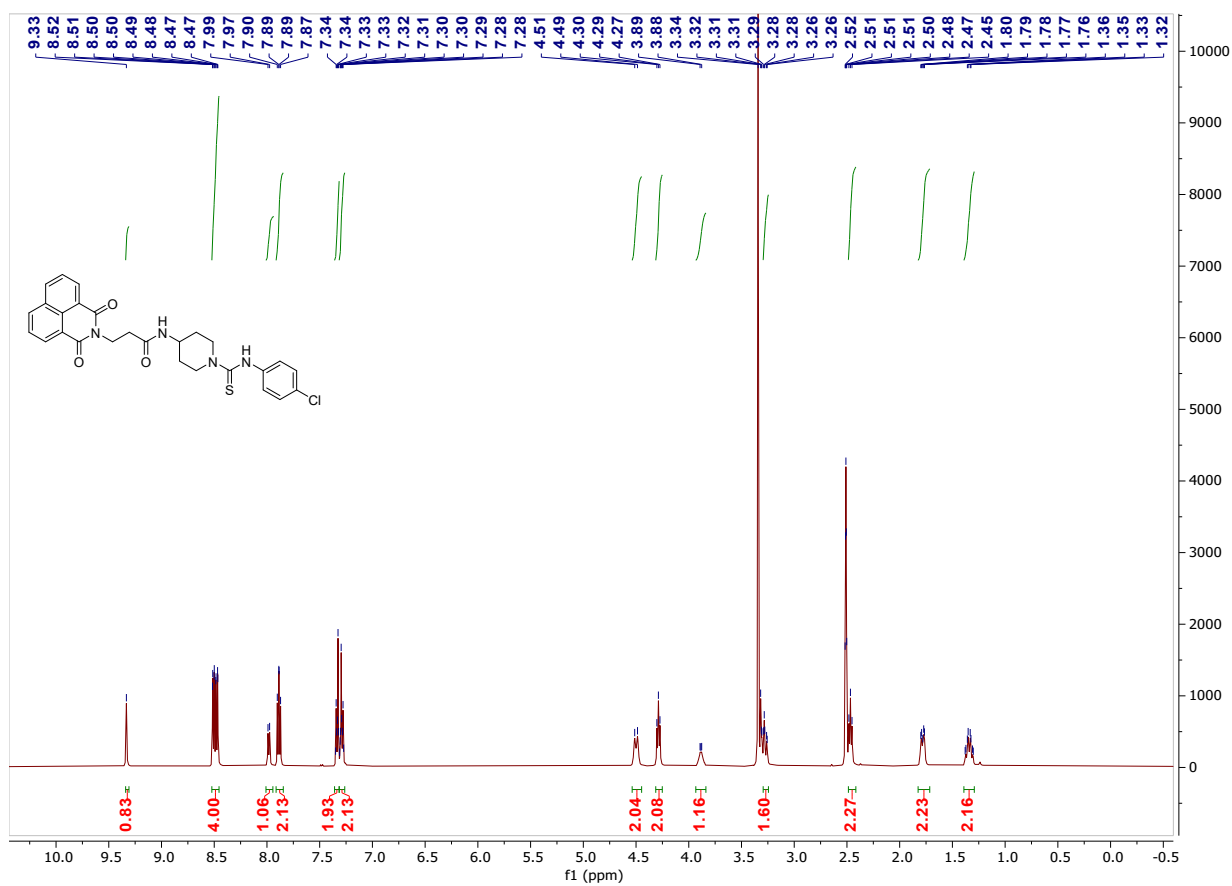

<sup>1</sup>H spectrum for compound 13g (500 MHz: DMSO-d<sub>6</sub>)

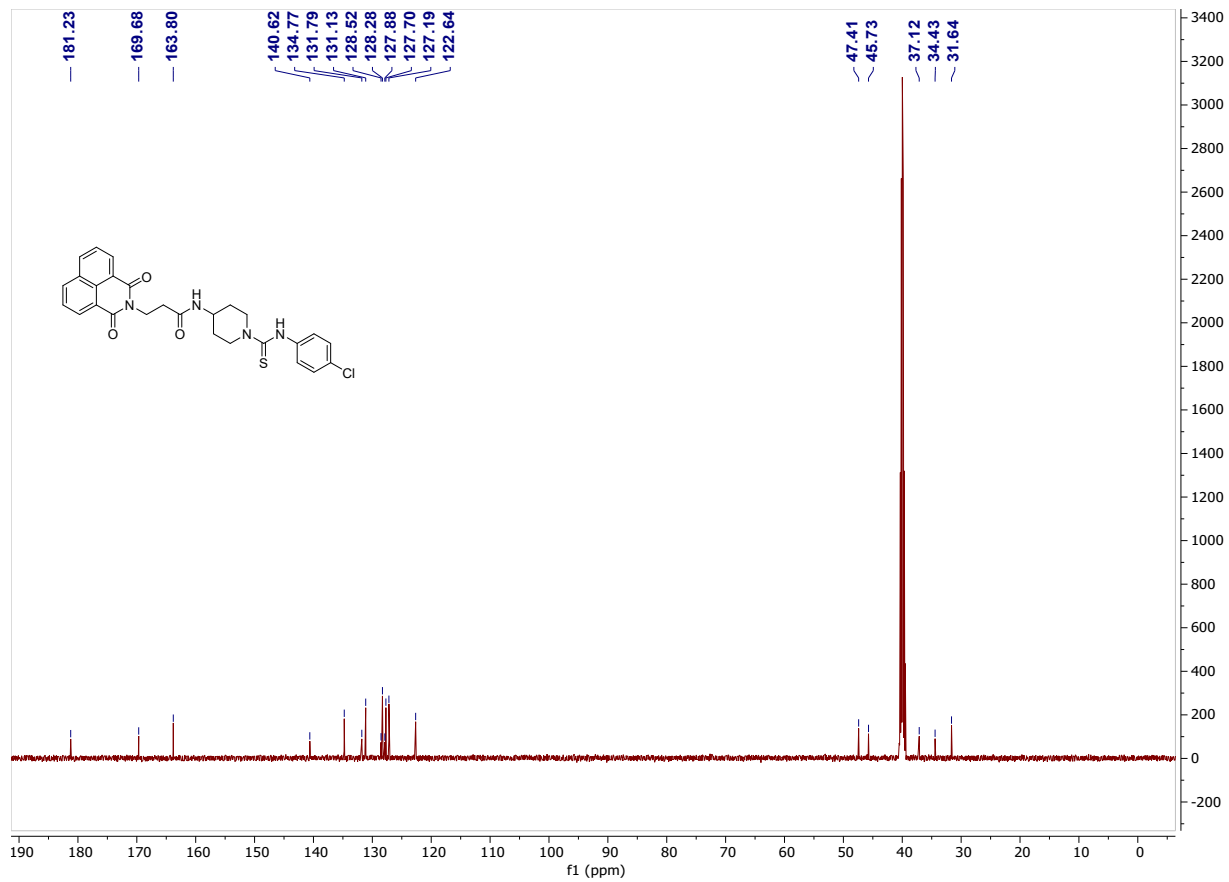

$^{13}\text{C}$  spectrum for compound **13g** (125 MHz:  $\text{DMSO-}d_6$ )

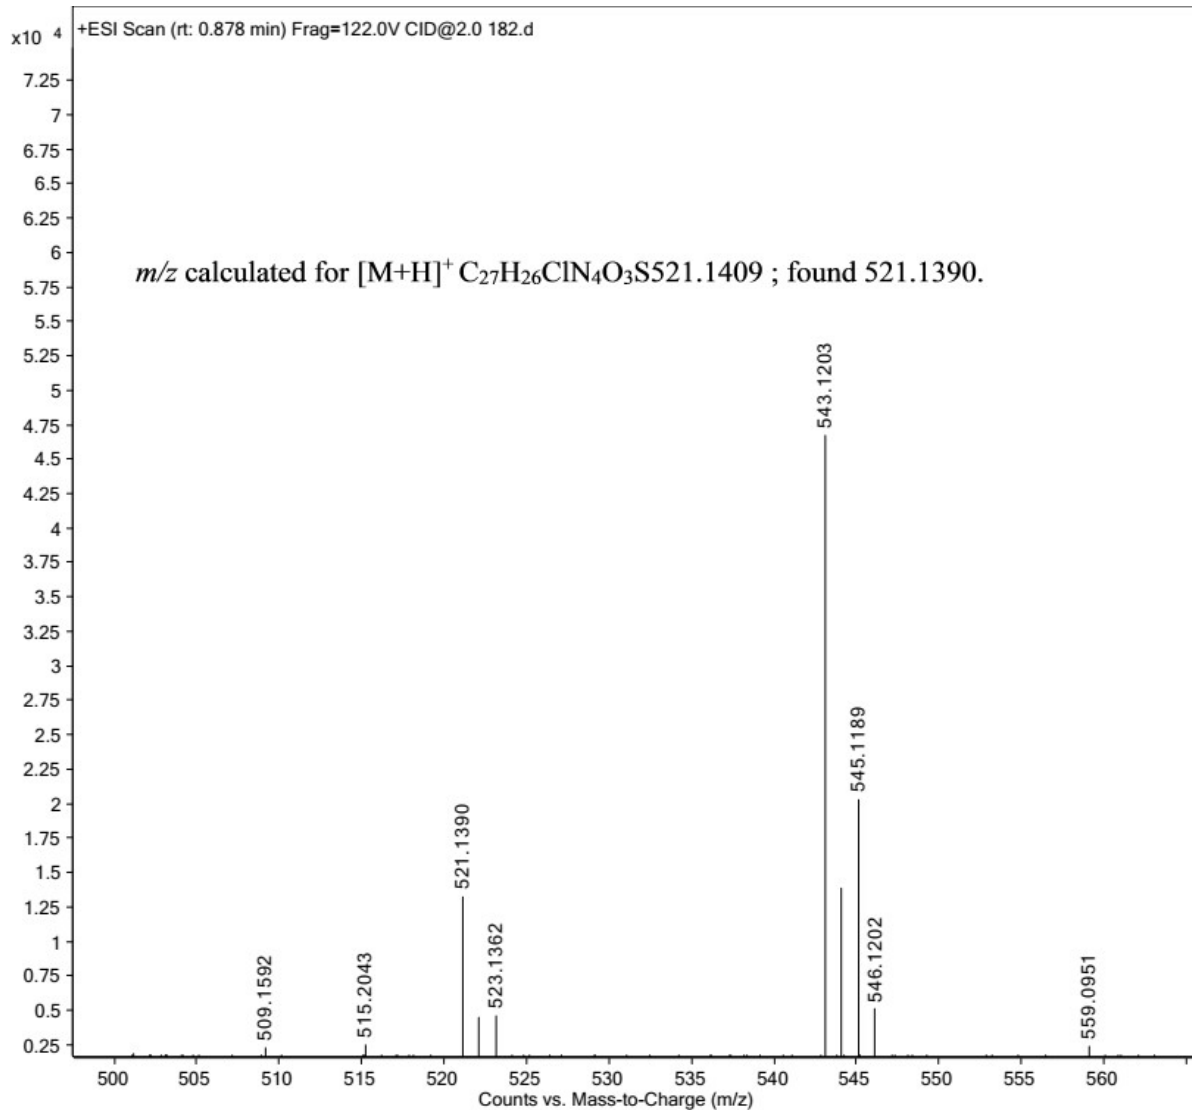

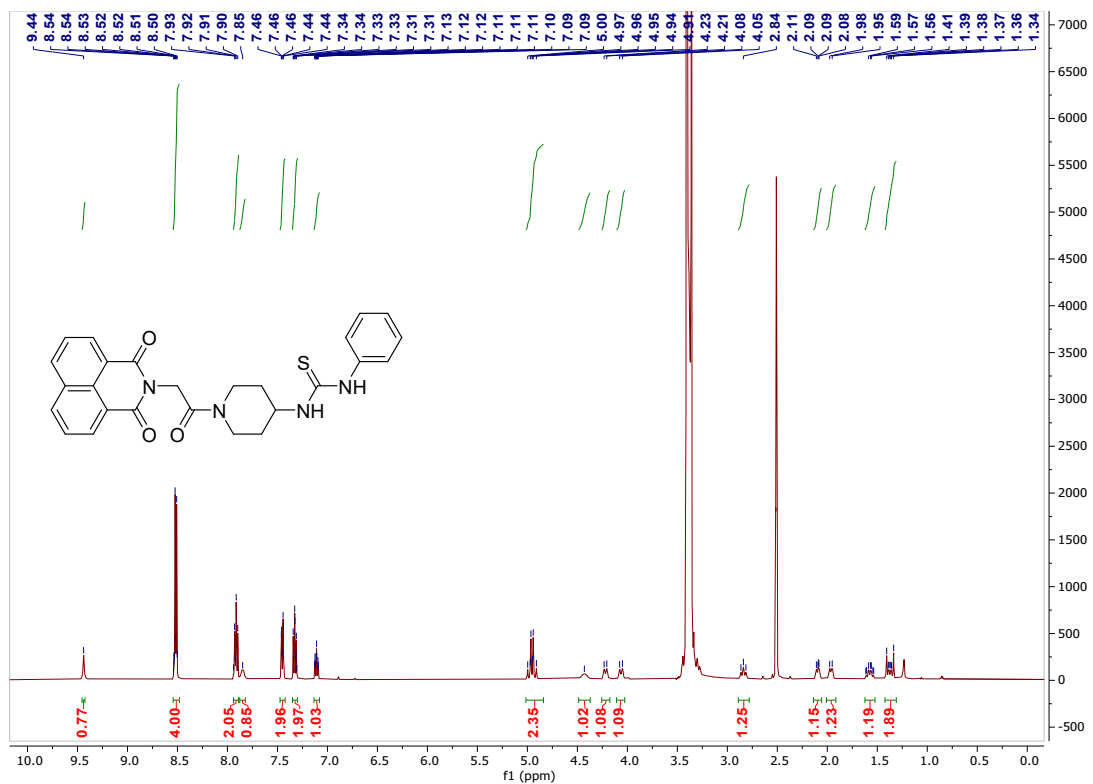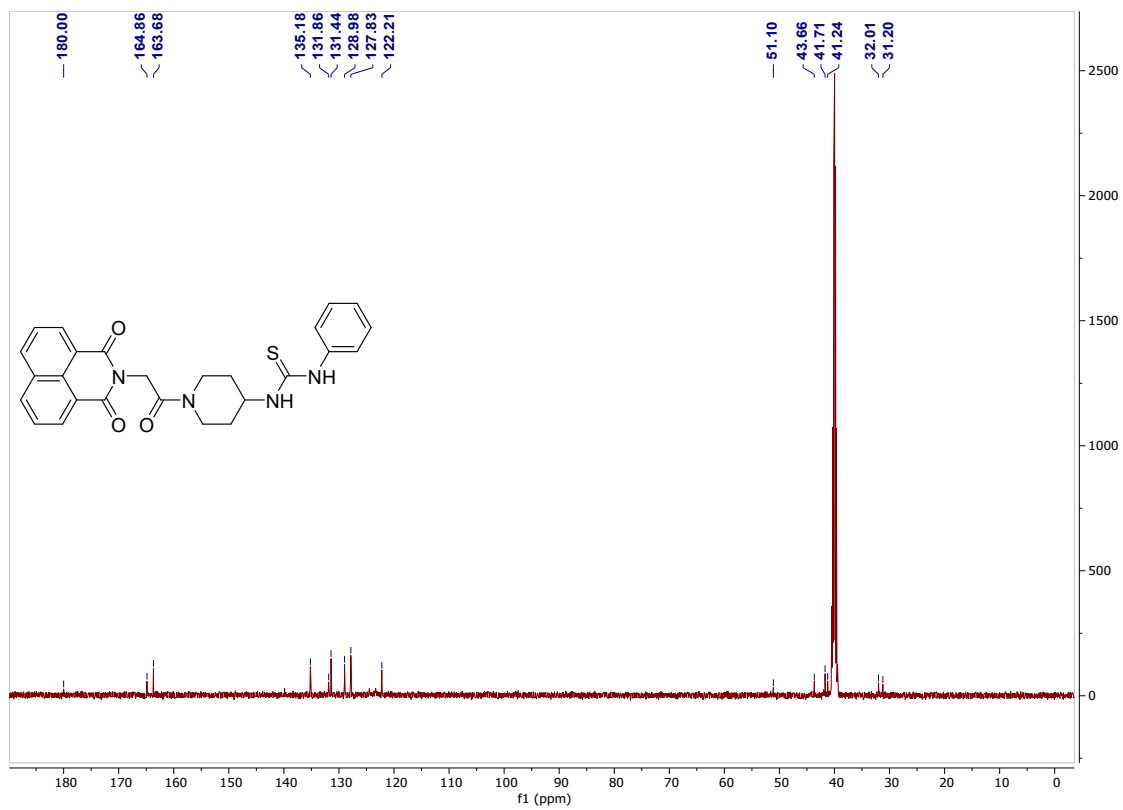

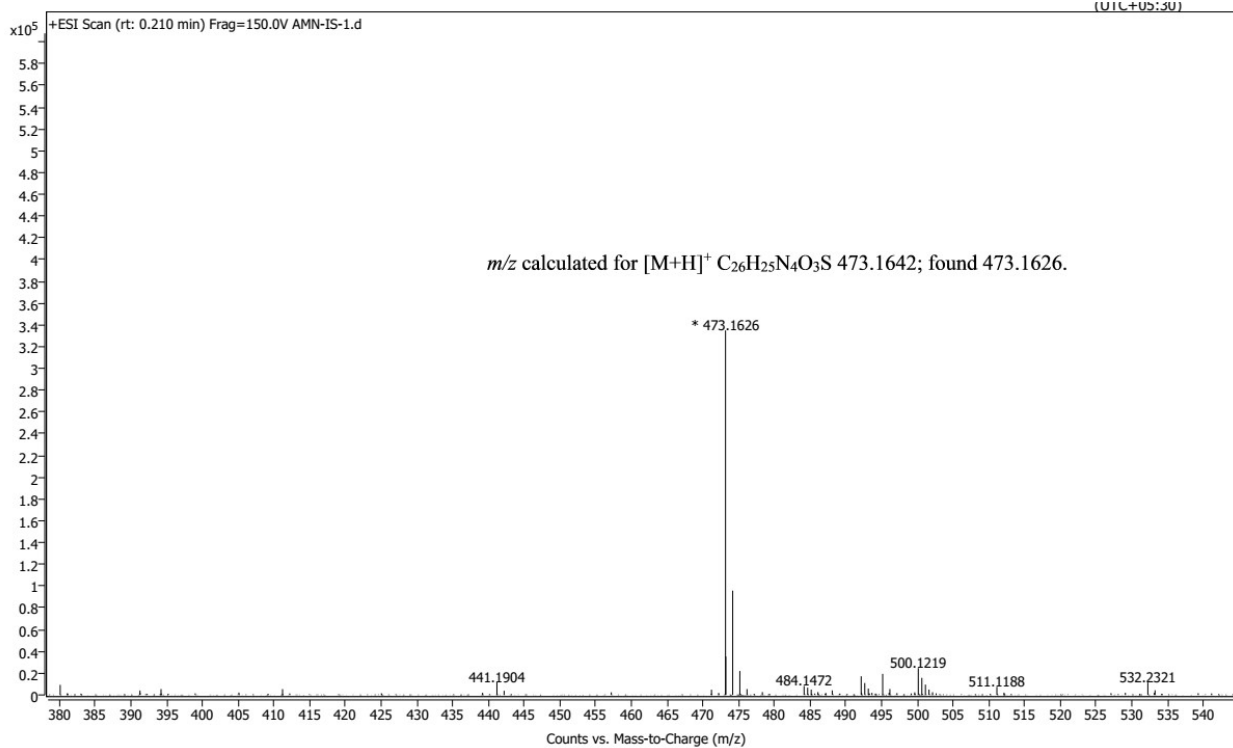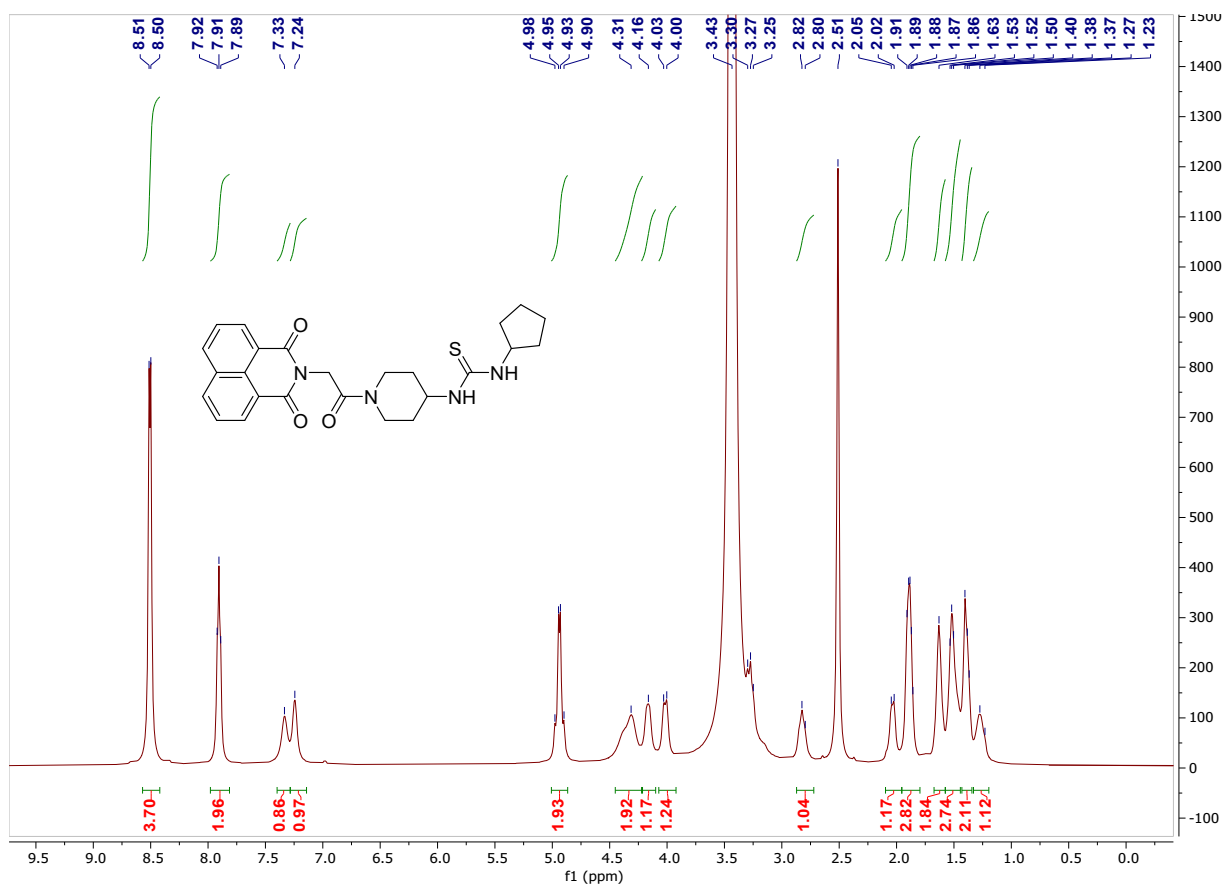



$^1\text{H}$  spectrum for compound **17b** (500 MHz:  $\text{DMSO-}d_6$ )

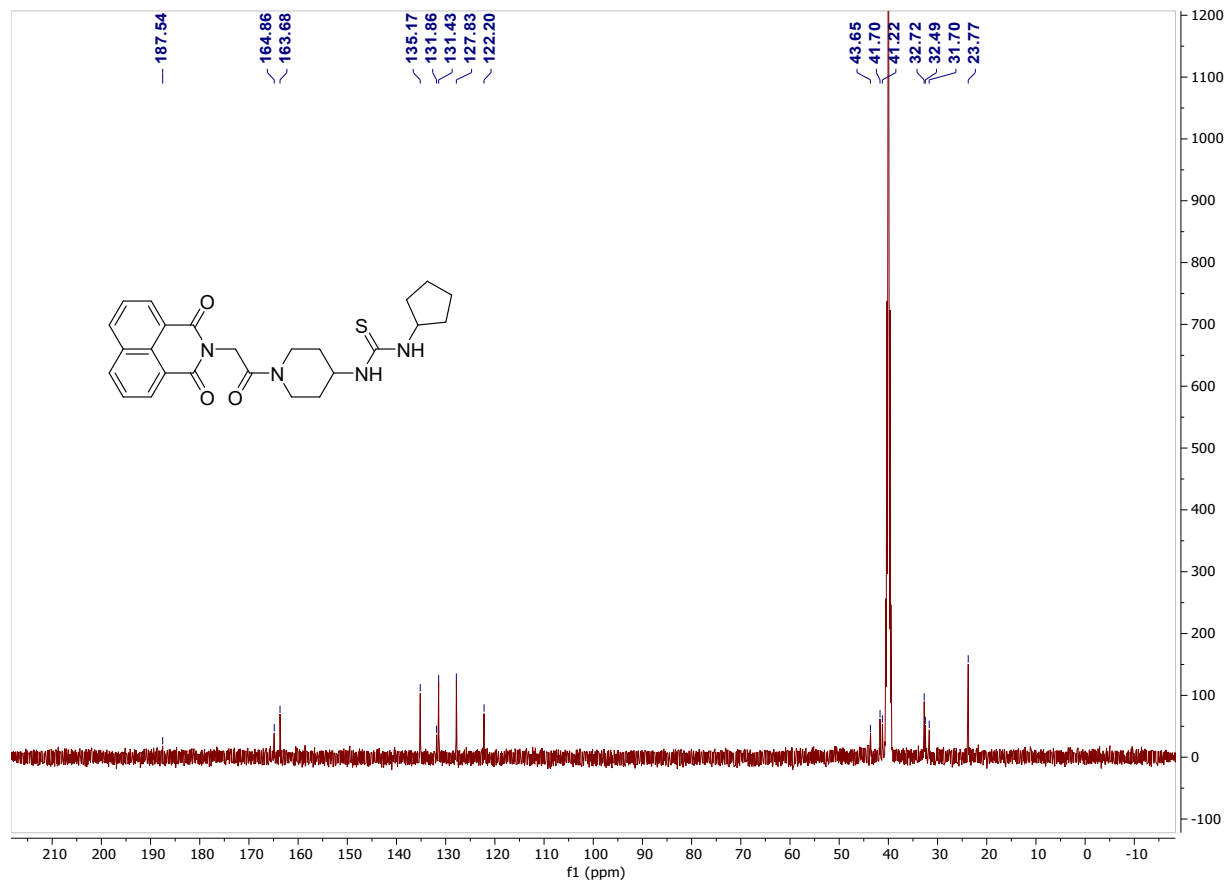

$^{13}\text{C}$  spectrum for compound **17b** (125 MHz:  $\text{DMSO-}d_6$ )

x10<sup>5</sup>

+ESI Scan (rt: 0.494 min) Frag=122.0V CID@2.0 30.d Subtract

$m/z$  calculated for  $[M+H]^+$  C<sub>25</sub>H<sub>29</sub>N<sub>4</sub>O<sub>3</sub>S 465.1955; found 465.1941.

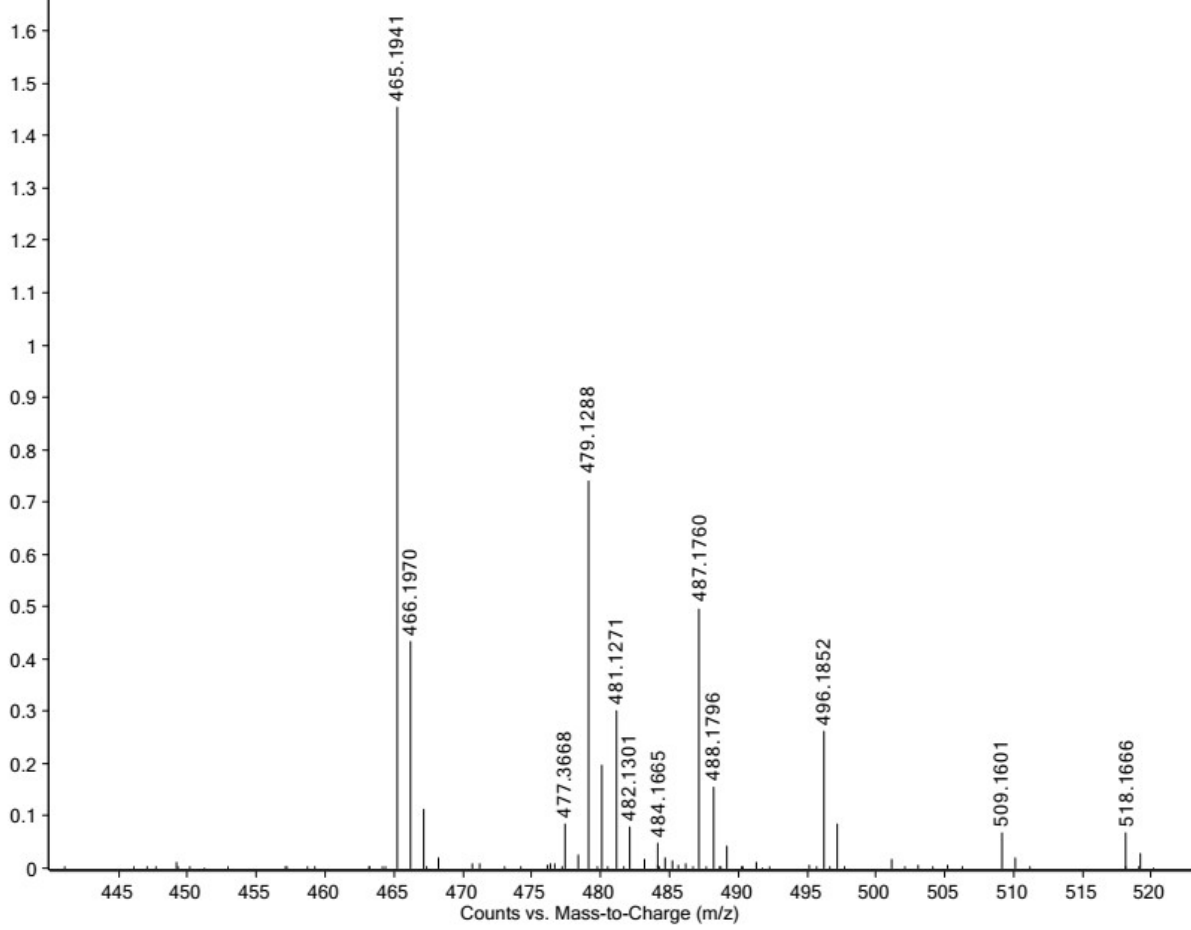

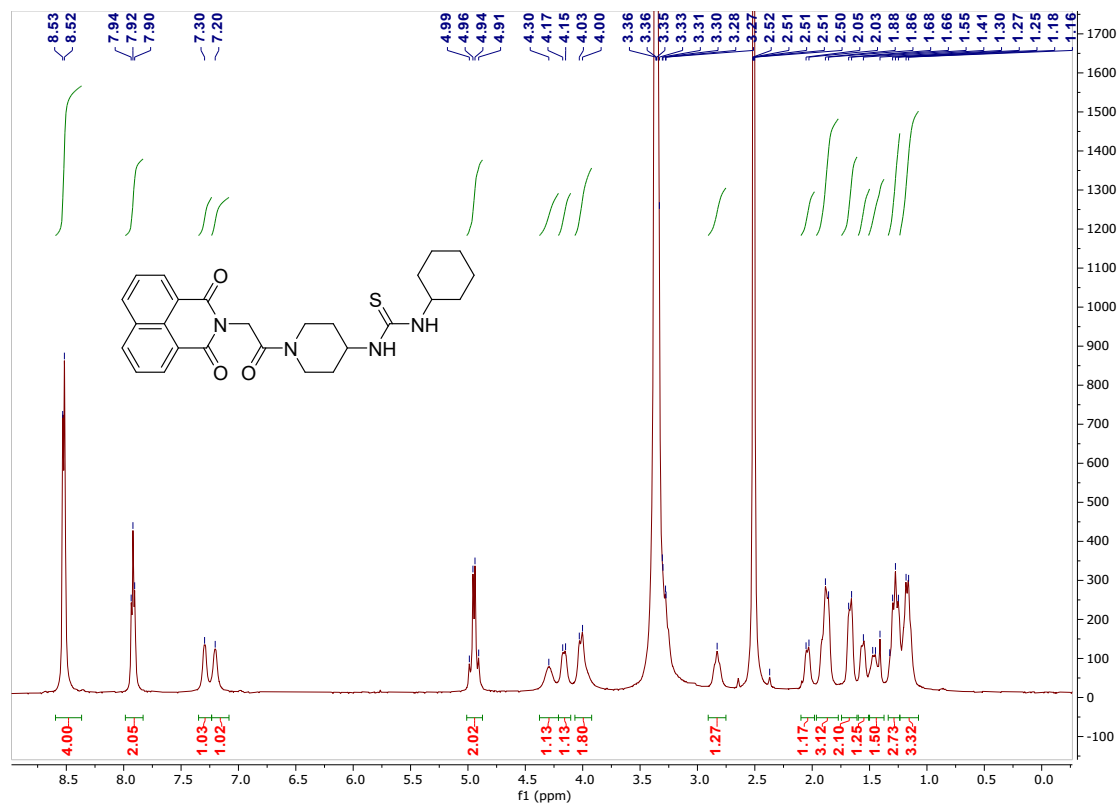

**<sup>1</sup>H spectrum for compound 17c (500 MHz: DMSO-d<sub>6</sub>)**

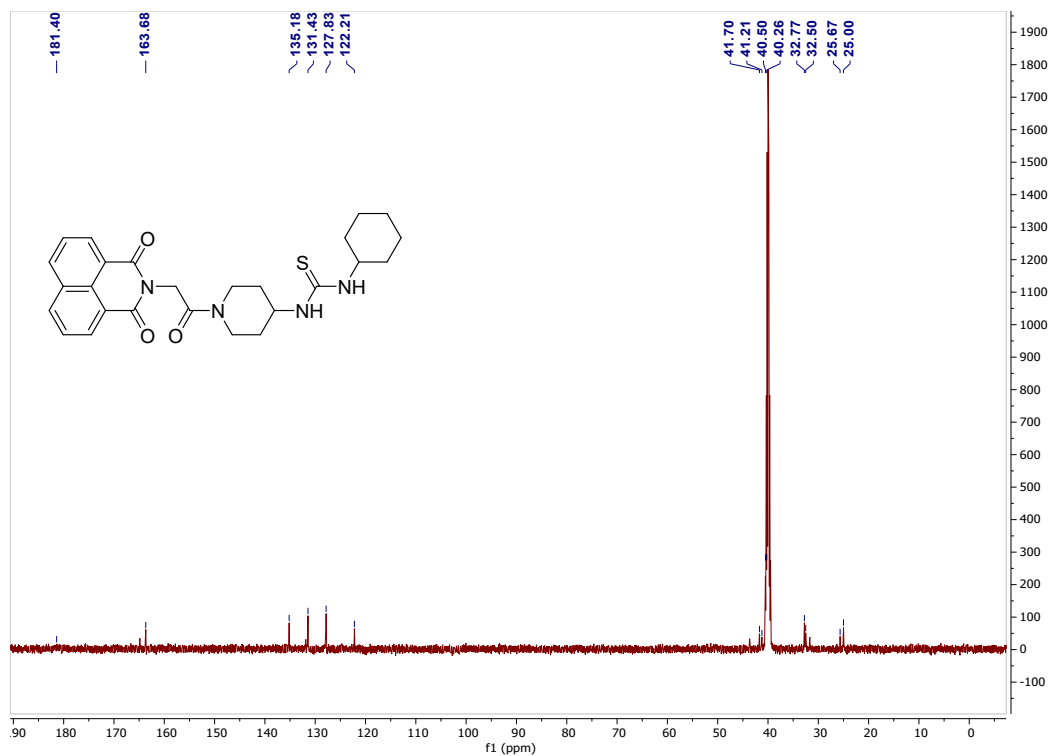

**<sup>13</sup>C spectrum for compound 17c (125 MHz: DMSO-d<sub>6</sub>)**

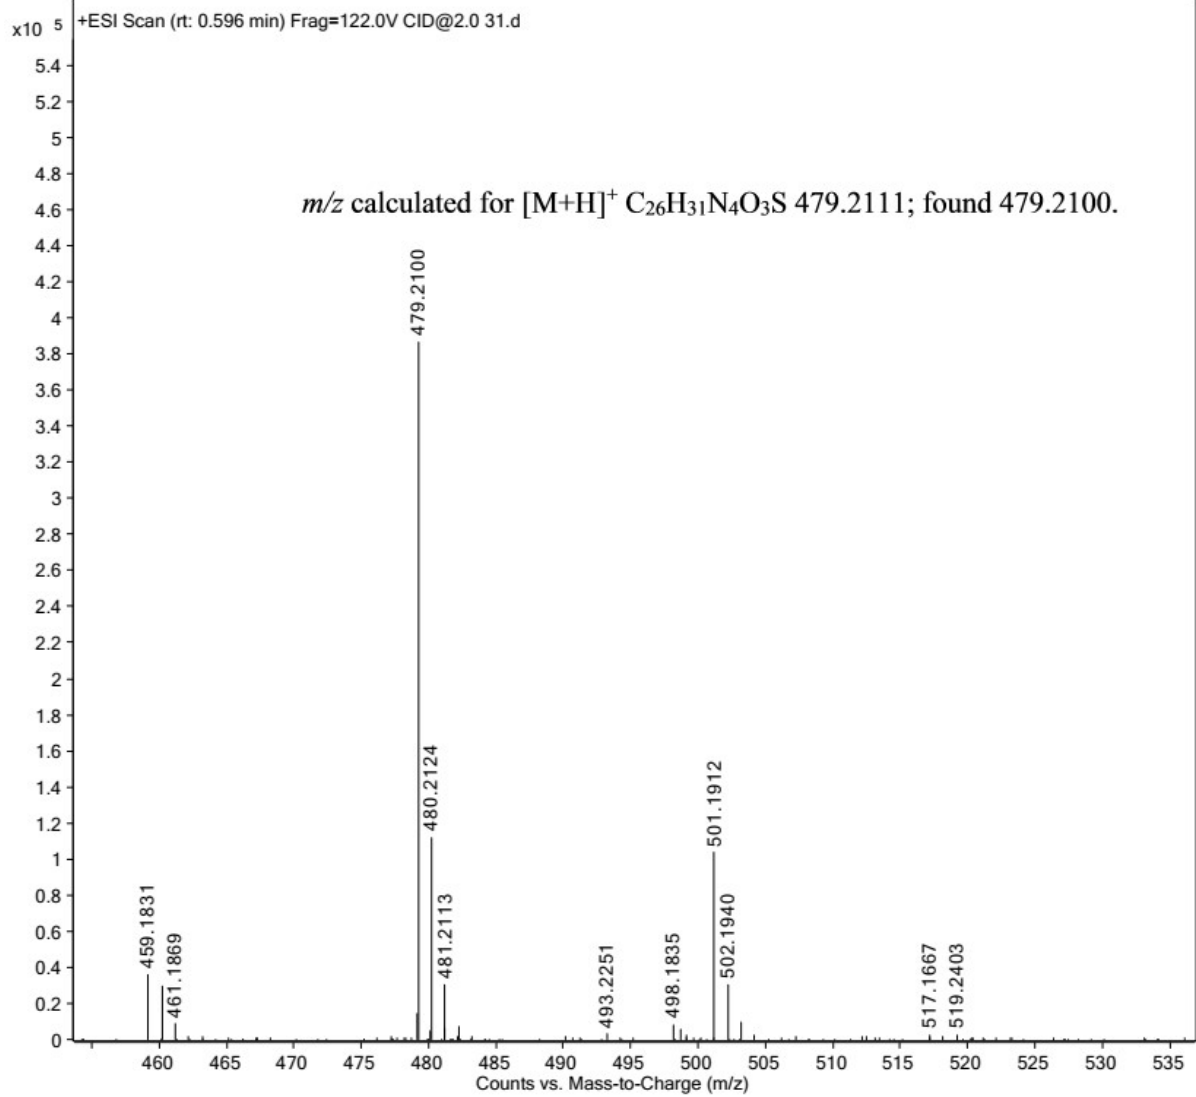

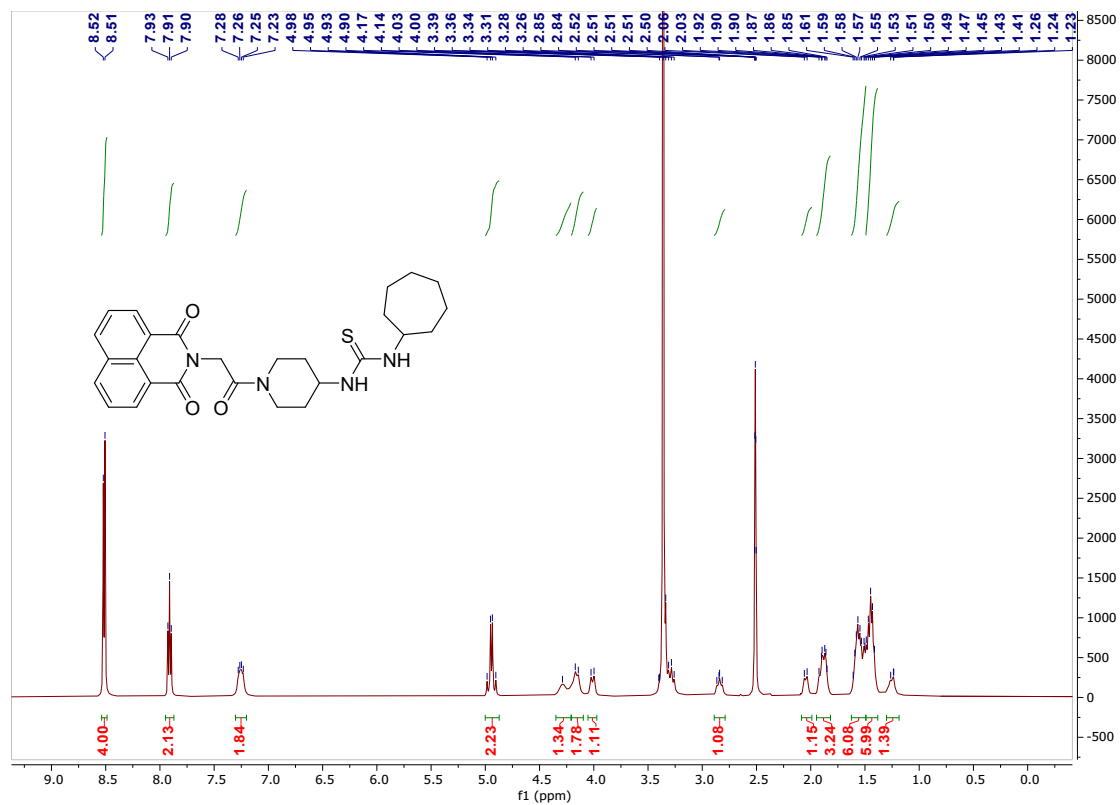

**<sup>1</sup>H spectrum for compound 17d (500 MHz: DMSO-*d*<sub>6</sub>)**

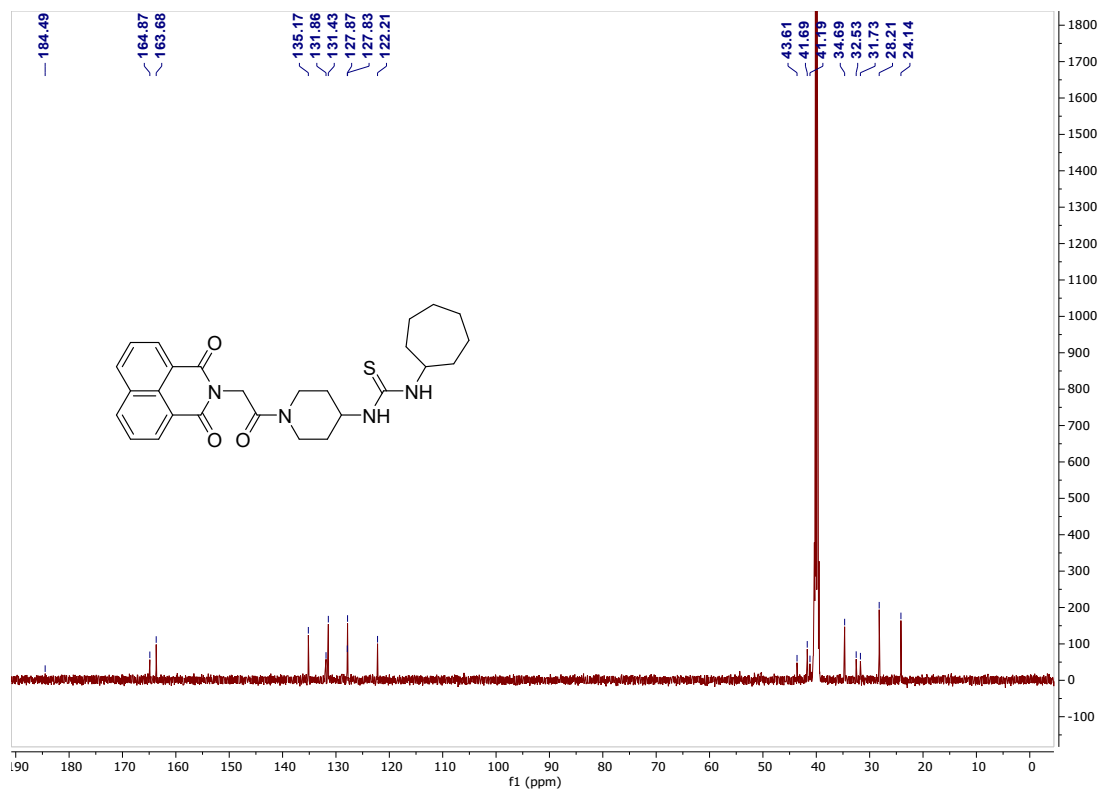

**<sup>13</sup>C spectrum for compound 17d (125 MHz: DMSO-*d*<sub>6</sub>)**

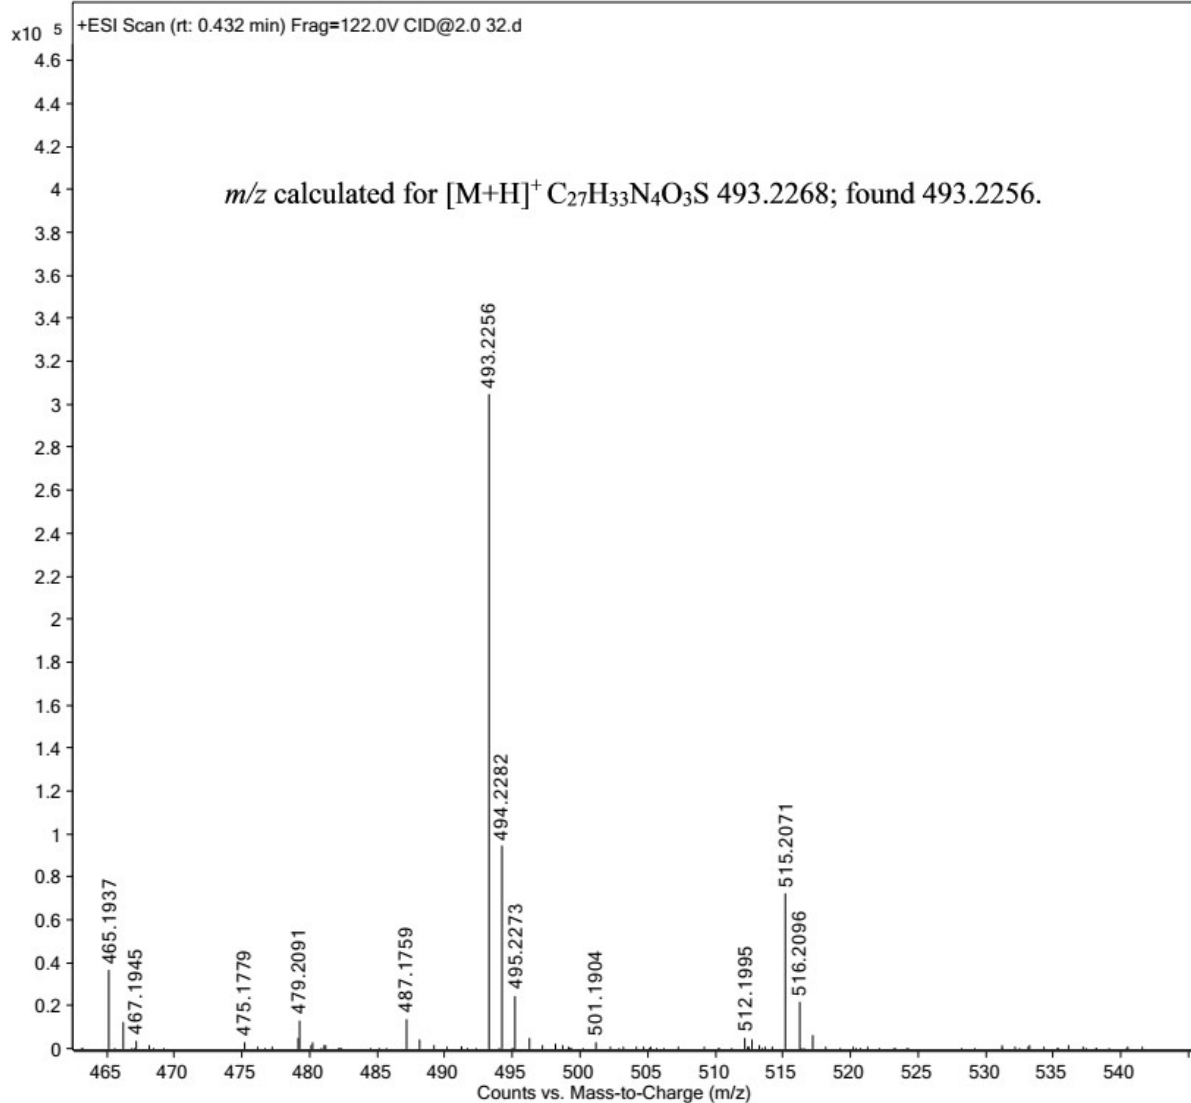

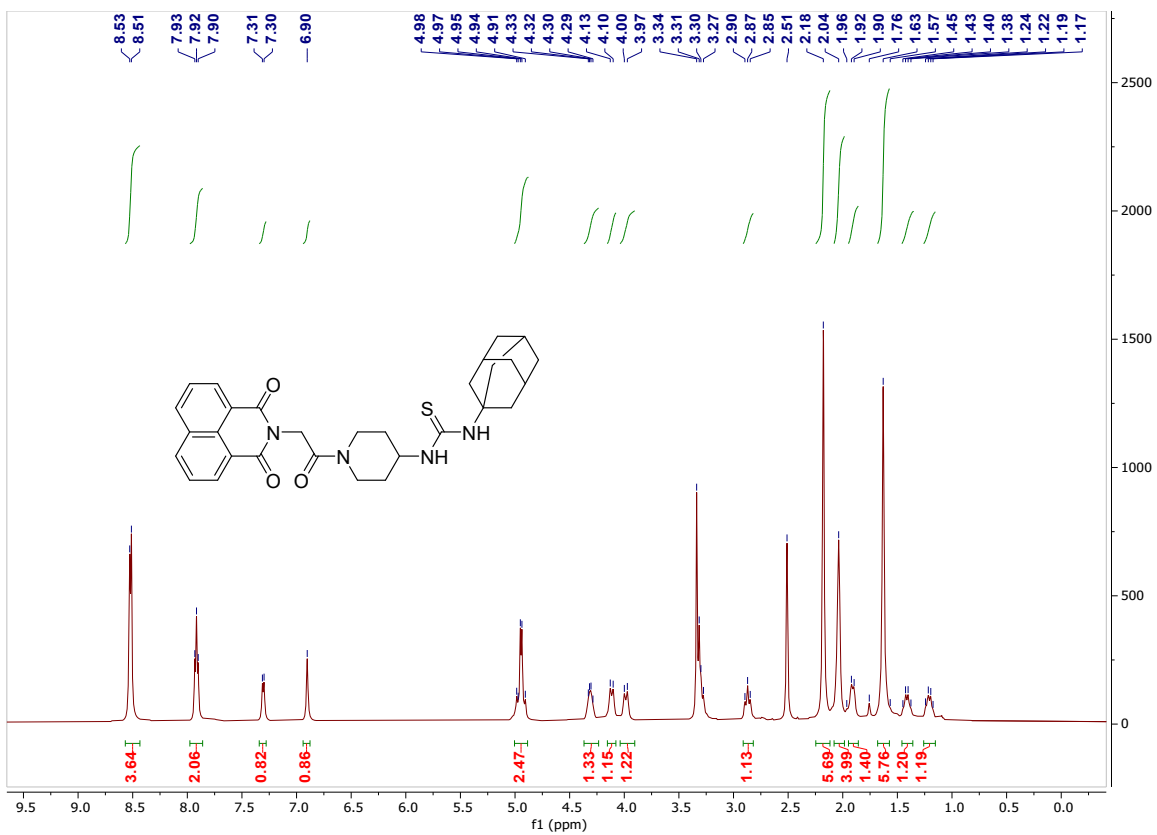

**<sup>1</sup>H spectrum for compound 17e (500 MHz: DMSO-d<sub>6</sub>)**

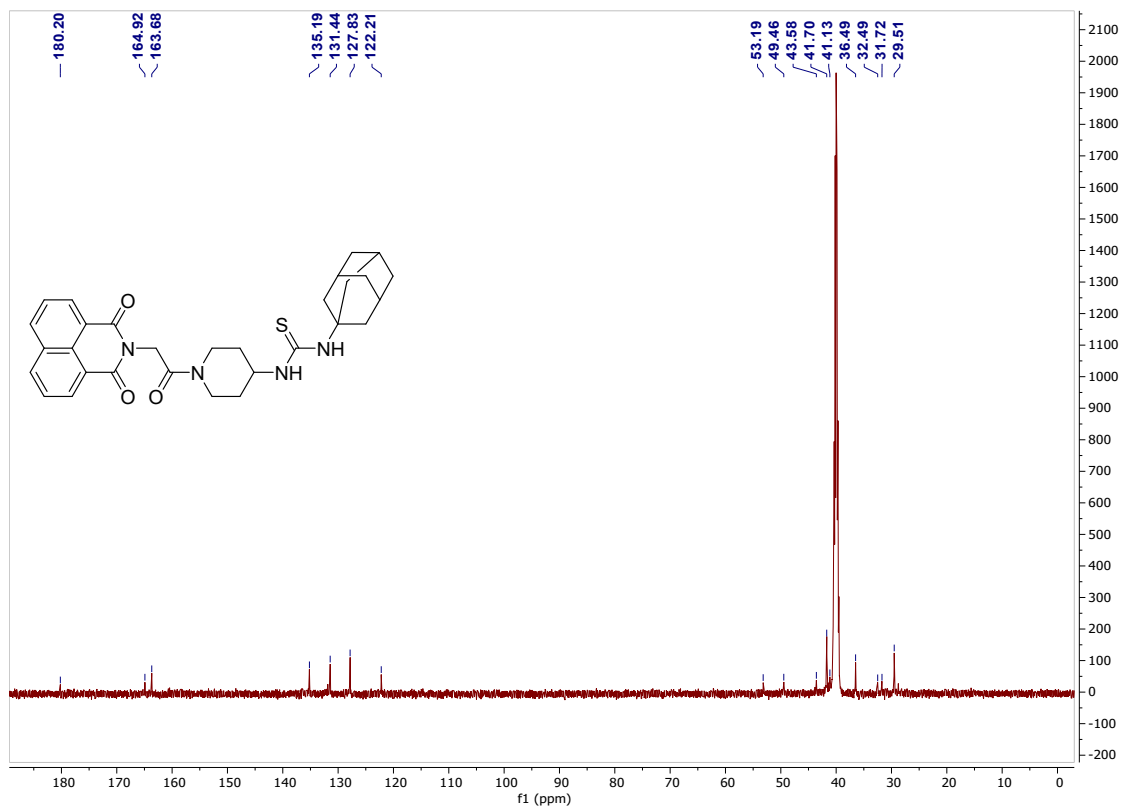

<sup>13</sup>C spectrum for compound **17e** (125 MHz: DMSO-*d*<sub>6</sub>)

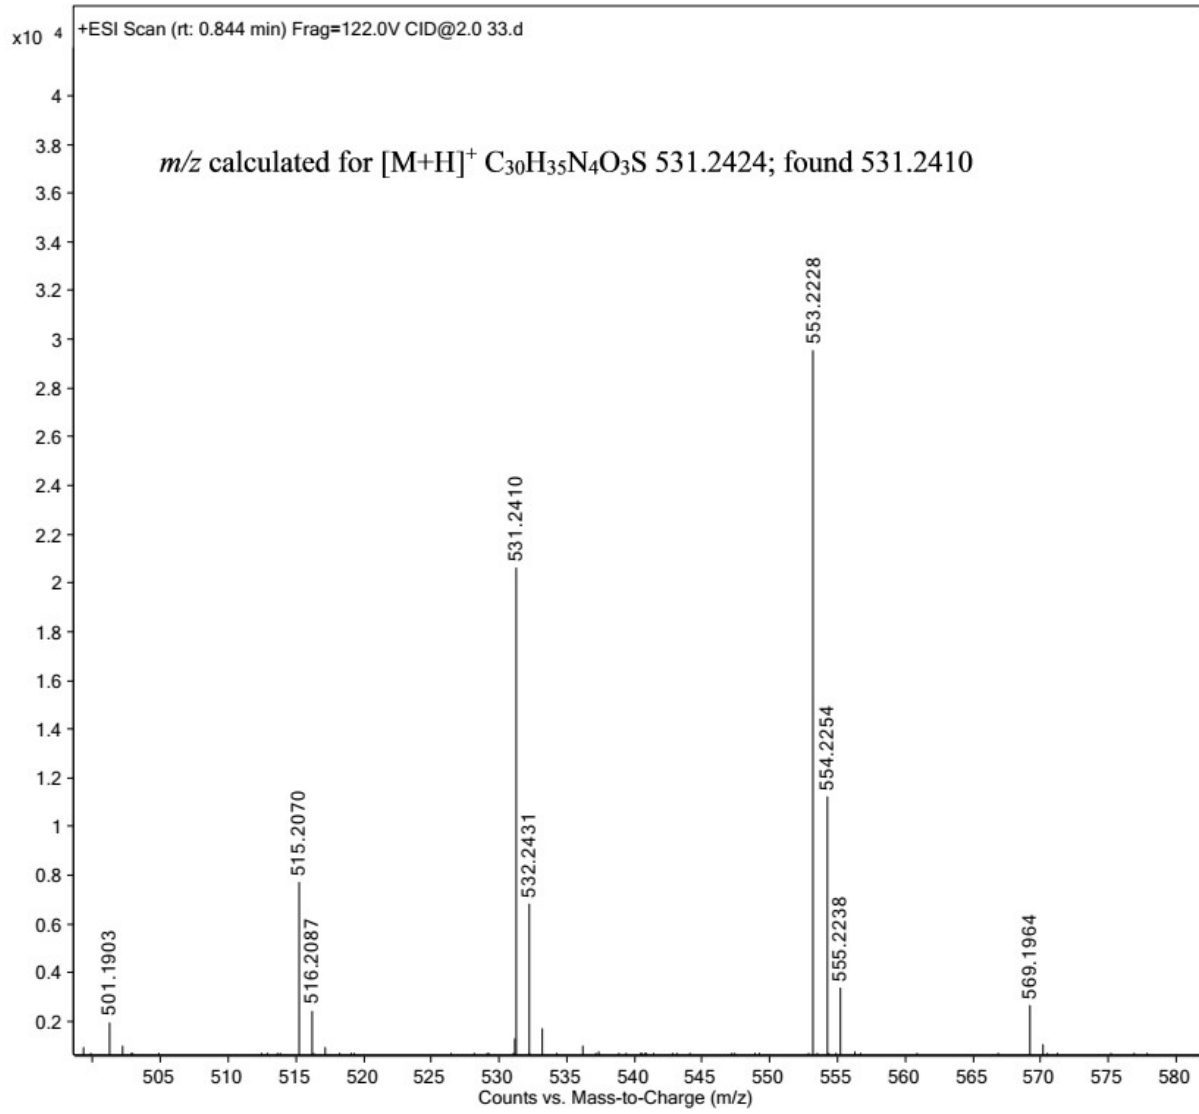



### 3. References

- [1] G.D. Christensen, W.A. Simpson, J.J. Younger, L.M. Baddour, F.F. Barrett, D.M. Melton, E.H. Beachey, G. Romney M. Humphries, Jane Ambler, Stephanie L. Mitchell, Mariana Castanheira, Tanis Dingle, Janet A. Hindler, K.S. Laura Koeth, CLSI Methods Development and Standardization Working Group Best Practices for Evaluation of Antimicrobial Susceptibility Tests, *J. Clin. Microbiol.* 56 (2018) 1–10. <https://doi.org/https://doi.org/10.1128/JCM.01934-17>.
- [2] J.H. Jorgensen, J.F. Hindler, New consensus guidelines from the Clinical and Laboratory Standards Institute for antimicrobial susceptibility testing of infrequently isolated or fastidious bacteria, *Clin. Infect. Dis.* 44 (2007) 280–286. <https://doi.org/10.1086/510431>.
- [3] M. Pandey, A.K. Singh, R. Thakare, S. Talwar, P. Karaulia, A. Dasgupta, S. Chopra, A.K. Pandey, Diphenyleneiodonium chloride (DPIC) displays broad-spectrum bactericidal activity, *Sci. Rep.* 7 (2017) 1–8. <https://doi.org/10.1038/s41598-017-11575-5>.
- [4] I. Wiegand, K. Hilpert, R.E.W. Hancock, Agar and broth dilution methods to determine the minimal inhibitory concentration (MIC) of antimicrobial substances, *Nat. Protoc.* 3 (2008) 163–175. <https://doi.org/10.1038/nprot.2007.521>.
- [5] B. Rivas-Santiago, C.E. Rivas Santiago, J.E. Castañeda-Delgado, J.C. León-Contreras, R.E.W. Hancock, R. Hernandez-Pando, Activity of LL-37, CRAMP and antimicrobial peptide-derived compounds E2, E6 and CP26 against *Mycobacterium tuberculosis*, *Int. J. Antimicrob. Agents.* 41 (2013) 143–148. <https://doi.org/10.1016/j.ijantimicag.2012.09.015>.
- [6] A. Nawaz, A. Jamal, A. Arif, Z. Parveen, In vitro cytotoxic potential of *Solanum nigrum* against human cancer cell lines, *Saudi J. Biol. Sci.* 28 (2021) 4786–4792. <https://doi.org/10.1016/j.sjbs.2021.05.004>.
- [7] S. Tahlan, P.K. Verma, Synthesis, SAR and in vitro therapeutic potentials of thiazolidine-2,4-diones, *Chem. Cent. J.* 12 (2018) 1–11. <https://doi.org/10.1186/s13065-018-0496-0>.
- [8] R. Thakare, A.K. Singh, S. Das, N. Vasudevan, G.R. Jachak, D.S. Reddy, A. Dasgupta, S. Chopra, Repurposing Ivacaftor for treatment of *Staphylococcus aureus* infections, *Int. J. Antimicrob. Agents.* 50 (2017) 389–392. <https://doi.org/https://doi.org/10.1016/j.ijantimicag.2017.03.020>.
- [9] Schrödinger Release 2022-1: Maestro, Schrödinger, LLC, New York, NY, 2021.
- [10] Schrödinger Release 2022-1: LigPrep, Schrödinger, LLC, New York, NY, 2021.
- [11] A.J. Lucas, J.L. Sproston, P. Barton, R.J. Riley, Estimating human ADME properties, pharmacokinetic parameters and likely clinical dose in drug discovery, *Expert Opin. Drug Discov.* 14 (2019) 1313–1327. <https://doi.org/10.1080/17460441.2019.1660642>.

[12] Schrödinger Release 2022-1: QikProp, Schrödinger, LLC, New York, NY, 2022.
